# Supplementary material for: Visible light-induced synthesis of 1,3-disubstituted bicyclo[1.1.1]pentane ketonesviacooperative photoredox and N-heterocyclic carbene catalysis
Source: Royal Society of Chemistry journal article supplement (doi:10.1039/d3gc00643c), 2023-01-01

SUPPORTING INFORMATION

**Visible Light-Induced Synthesis of 1,3-Disubstituted Bicyclo-[1.1.1]pentane Ketones via Cooperative Photoredox and *N*-Heterocyclic Carbene Catalysis**

Yan Gao, Zicong Zheng, Yu Zhu, Wenhao Xu, Yu Zhou, Chuanming Yu, and Xinpeng Jiang\*

**Contents**

|                                                                                                     |     |
|-----------------------------------------------------------------------------------------------------|-----|
| 1. General information .....                                                                        | S2  |
| 2. Preparation of the solution of [1.1.1]propellane.....                                            | S2  |
| 3. General procedure .....                                                                          | S2  |
| 4. Gram-scale experiment .....                                                                      | S3  |
| 5. Mechanistic studies .....                                                                        | S3  |
| 6. Characterization of products .....                                                               | S7  |
| 7. Reference .....                                                                                  | S19 |
| 8. Copies of <sup>1</sup> H, <sup>19</sup> F, and <sup>13</sup> C NMR spectra of all products. .... | S20 |

## 1. General information

**General remarks.** Reactions were performed under an Ar atmosphere using pre-dried glassware. Thin-layer chromatography (TLC) was conducted on plates (GF254) supplied by Yantai Chemicals (China). Column chromatography was performed on silica gel (300-400 mesh).

**Materials.** Compounds **1s**,<sup>[1]</sup> **1ab-1ac**,<sup>[2]</sup> (**3b-3l**, **3o-3q**),<sup>[3]</sup> **3m**,<sup>[4]</sup> **3n**,<sup>[5]</sup> (NHC **A**, **F**, and **G**),<sup>[6]</sup> and (NHC **B** and **C**)<sup>[7]</sup> were prepared using reported procedures. Other compounds were purchased from Energy Chemical or Bidepharm and used without further purification.

**Instrumentation.** NMR spectra were recorded using Bruker Avance III 400 MHz or Bruker Avance III 600 MHz spectrometers. Chemical shifts ( $\delta$ ) were reported in ppm relative to the residual solvent signal ( $\text{CDCl}_3$   $\delta = 7.26$  for  $^1\text{H}$  NMR and  $\delta = 77.0$  for  $^{13}\text{C}$  NMR). Multiplicities are given as s (singlet), d (doublet), t (triplet), dd (doublet of doublets), td (triplet of doublets), or m (multiplet). Melting points were determined using a Büchi B-540 capillary melting point apparatus. HRMS spectra were recorded on an electrospray ionization quadrupole time-of-flight (ESI-Q-TOF) mass spectrometer. Electron spin resonance (ESR) spectra were recorded with a JEOL JES FA200 (X-band). The UV-Vis absorption spectra were measured on a SHIMADZU UV-2550 spectrometer. Emission intensities results were monitored by an F-7000 FL spectrophotometer.

## 2. Preparation of the solution of [1.1.1]propellane

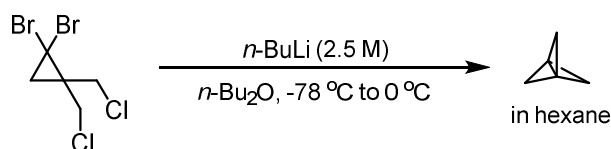

A solution of *n*-BuLi (48 mL, 120 mmol, 2.0 equiv., 2.5 M in hexane) was added dropwise to a suspension of 1,1-dibromo-2,2-bis(chloromethyl)cyclopropane (60 mmol) in anhydrous dibutyl ether (60 mL) under argon at  $-78\text{ }^\circ\text{C}$ . After the addition was complete, the mixture was allowed to warm to  $0\text{ }^\circ\text{C}$  and stirred for 2 h before distillation under vacuum. The concentration can be measured by  $^1\text{H}$ -NMR with 1,3,5-trimethoxybenzene as an internal standard (typically concentrations are 0.4-0.7 M).

## 3. General procedure

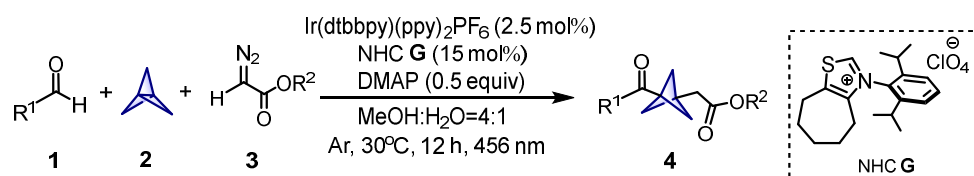

To a 10 mL seal tube equipped with a magnetic stir bar was added NHC **G** (12 mg, 0.03 mmol, 0.15 equiv.), DMAP (12 mg, 0.1 mmol, 0.5 equiv.),  $\text{Ir(dtbbpy)(ppy)}_2\text{PF}_6$  (5 mg, 0.005 mmol, 2.5

mol %), **1** (if solid) (0.28 mmol, 1.4 equiv.), and **3** (if solid) (0.4 mmol, 2.0 equiv.). The tube was sealed, evacuated, and backfilled with argon three times, then MeOH-H<sub>2</sub>O = 4:1 (2.0 mL), **1** (if liquid) (0.28 mmol, 1.4 equiv.), **3** (if liquid) (0.4 mmol, 2.0 equiv.), and **2** (0.2 mmol, 1.0 equiv.) were sequentially added. The resulting solution was irradiated by a 40 W Kessil lamp (456 nm, blue light, third gear) with stirring at a distance of 5 cm (with cooling by a fan) at 30 °C for about 12 h. The mixture was diluted with EtOAc (15 mL), then washed with water (10 mL) and brine (10 mL). The organic phase was dried over Na<sub>2</sub>SO<sub>4</sub>, filtered, and then concentrated under reduced pressure, purified by column chromatography on silica gel (petroleum ether/EtOAc) to afford the desired product **4**.

## 4. Gram-scale experiment

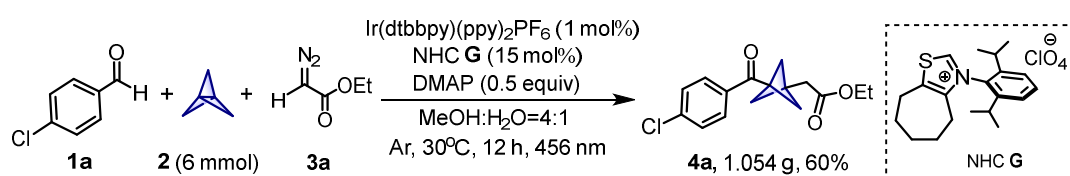

To a 100 mL three-necked flask equipped with a magnetic stir bar was added NHC **G** (373 mg, 0.9 mmol, 0.15 equiv.), DMAP (367 mg, 3 mmol, 0.5 equiv.), Ir(dtbbpy)(ppy)<sub>2</sub>PF<sub>6</sub> (55 mg, 0.06 mmol, 1 mol %), **1a** (8.4 mmol, 1.4 equiv.) sequentially under argon atmosphere, then MeOH-H<sub>2</sub>O = 4:1 (50.0 mL), **3a** (12 mmol, 2.0 equiv.), and **2** (6 mmol, 1.0 equiv.) were sequentially added. The resulting solution was irradiated by two 40 W Kessil lamps (456 nm, blue light, third gear) with stirring at a distance of 5 cm (with cooling by a fan) at 30 °C for about 12 h. The mixture was diluted with EtOAc (30 mL), then washed with water (30 mL) and brine (30 mL). The organic phase was dried over Na<sub>2</sub>SO<sub>4</sub>, filtered, and then concentrated under reduced pressure, purified by column chromatography on silica gel (petroleum ether/EtOAc) to afford the desired product **4a**.

## 5. Mechanistic studies

### 5.1 ESR experiments

Electron spin resonance (ESR) spectra were recorded with a JEOL JES FA200 (X-band). The sample was bubbled with Ar for over 5 min, then a small amount of the sample was transferred to a capillary under Ar, and ESR spectra were recorded under different conditions. ESR conditions: frequency (9.228 GHz), power (1 mW), modulation width (0.1 mT), center field (329 mT), amplitude (2 mT), sweep width (5 mT), sweep time (2 min), time constant (0.03 s).

A mixture (20 uL) of **1a** (140 mM), **2** (100 mM), **3a** (200 mM), PC-**I** (2.5 mol%), NHC **G** (15 mol%), 5,5-dimethyl-1-pyrroline *N*-oxide (DMPO; 100 mM), and DMAP (50 mM) in MeOH: H<sub>2</sub>O = 4:1 was transferred to a capillary tube, then the capillary tube was transferred to a quartz tube, the quartz tube was then placed in the ESR test cavity. After the mixture was irradiated with visible light (>420 nm) for 2 min, a composite spectrum was recorded with two sextet signals, one was a Breslow

intermediate **II** radical with  $g = 2.0054$ ,  $A_N = 1.508$  mT,  $A_H = 1.948$  mT, the other carbon-centered radical with  $g = 2.0051$ ,  $A_N = 1.526$  mT,  $A_H = 2.227$  mT was supposed to be an intermediate of the carbon-centered radical **V** (Figure S1).

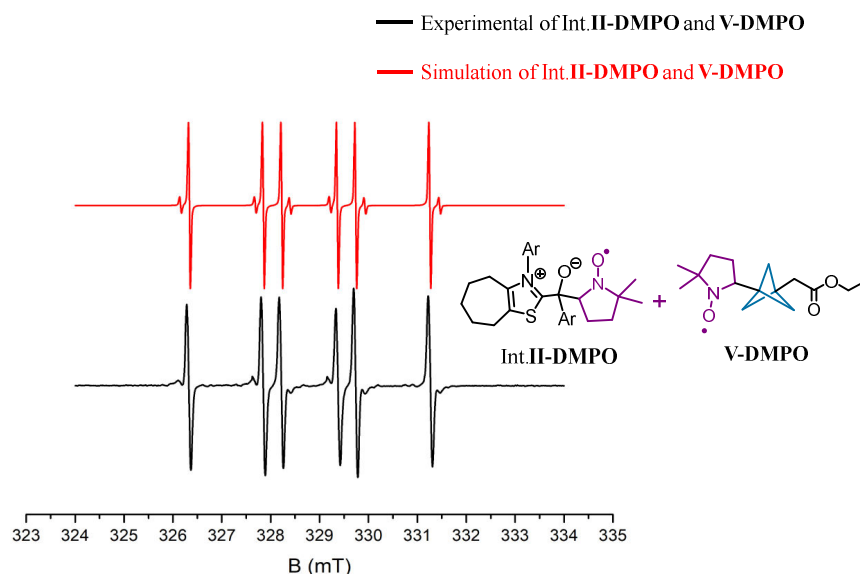

Figure S1. (Black line) ESR spectra for a mixture of **1a** (140 mM), **2** (100 mM), **3a** (200 mM), PC-**I** (2.5 mol%), NHC **G** (15 mol%), 5,5-dimethyl-1-pyrroline *N*-oxide (DMPO; 100 mM), and DMAP (50 mM) in MeOH: H<sub>2</sub>O = 4:1. (Red line) Stimulated spectra.

A mixture (20  $\mu$ L) of **1a** (140 mM), **3a** (200 mM), PC-**I** (2.5 mol%), NHC **G** (15 mol%), 5,5-dimethyl-1-pyrroline *N*-oxide (DMPO; 100 mM), and DMAP (50 mM) in MeOH: H<sub>2</sub>O = 4:1 was transferred to a capillary tube, then the capillary tube was transferred to a quartz tube, the quartz tube was then placed in the ESR test cavity. After the mixture was irradiated with visible light (>420 nm) for 2 min, a sextet signal was recorded, with a  $g = 2.0051$ ,  $A_N = 1.529$  mT,  $A_H = 2.239$  mT, which referred to be a carbon-centered radical **IV** (Figure S2).

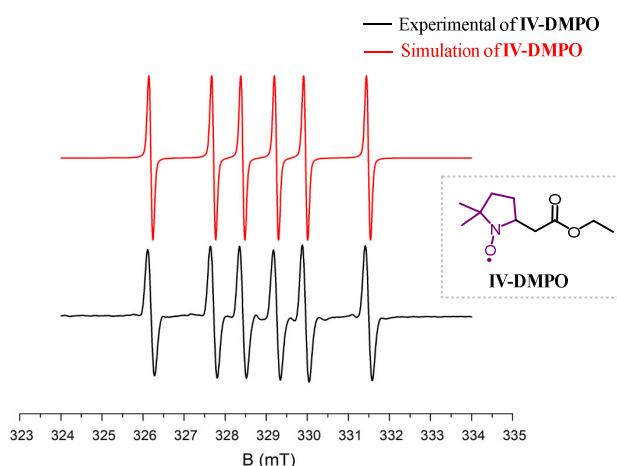

Figure S2. (Black line) ESR spectra for a mixture of **1a** (140 mM), **3a** (200 mM), PC-**I** (2.5 mol%), NHC **G** (15 mol%), 5,5-dimethyl-1-pyrroline *N*-oxide (DMPO; 100 mM), and DMAP (50 mM) in MeOH: H<sub>2</sub>O = 4:1. (Red line) Stimulated spectra.

A mixture (20  $\mu$ L) of **1a** (140 mM), **2** (100 mM), PC-**I** (2.5 mol%), NHC **G** (15 mol%), 5,5-

dimethyl-1-pyrroline *N*-oxide (DMPO; 100 mM), and DMAP (50 mM) in MeOH : H<sub>2</sub>O = 4:1 was transferred to a capillary tube, then the capillary tube was transferred to a quartz tube, the quartz tube was then placed in the ESR test cavity. After the mixture was irradiated with visible light (>420 nm) for 2 min, a very weak sextet signal was recorded, with a  $g = 2.0054$ ,  $A_N = 1.508$  mT,  $A_H = 1.968$  mT, which was coincident with a Breslow intermediate **II** radical (Figure S3).

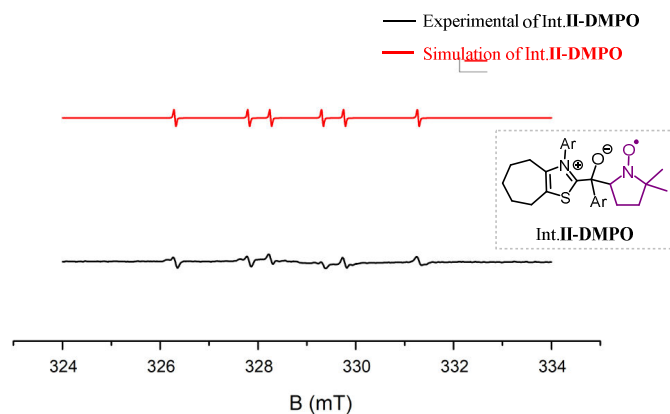

Figure S3. (Black line) ESR spectra for a mixture of **1a** (140 mM), **2** (100 mM), PC-**I** (2.5 mol%), NHC **G** (15 mol%), 5,5-dimethyl-1-pyrroline *N*-oxide (DMPO; 100 mM), and DMAP (50 mM) in MeOH:H<sub>2</sub>O = 4:1. (Red line) Stimulated spectra.

## 5.2 UV-Vis absorption and emission spectra

The UV-Vis absorption spectra of Breslow Intermediate **I** (Int. **I**) and Ir(ppy)<sub>2</sub>(dtbbpy)PF<sub>6</sub> (PC-**I**) were measured on a SHIMADZU UV-2550 spectrometer under reaction concentration in DMSO. The emission spectra of PC-**I** ( $2.5 \times 10^{-4}$  M in DMSO) upon excitation at 550 nm were recorded (Figure S4, orange dashed line). In addition, the mixture of Int. **I** (0.14 M) and diazo ester **3a** (0.2 M) did not exhibit a significant bathochromic shift in the absorption, excluding the possibility of the formation of EDA complex (Figure S5).

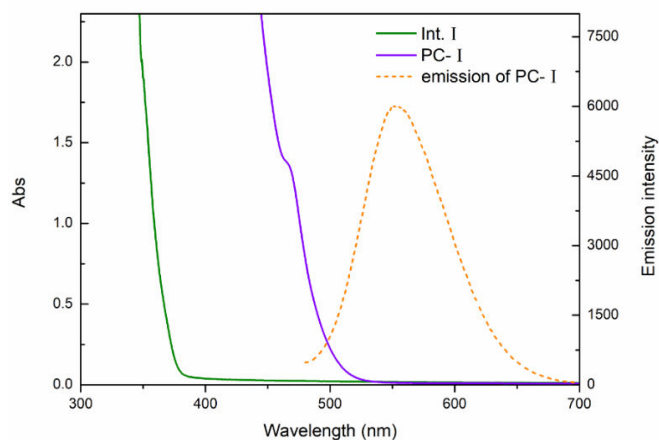

Figure S4. UV-Vis absorption and emission spectra (UV-Vis absorption spectra of Int. **I** and PC-**I**. Emission spectrum of PC-**I**).

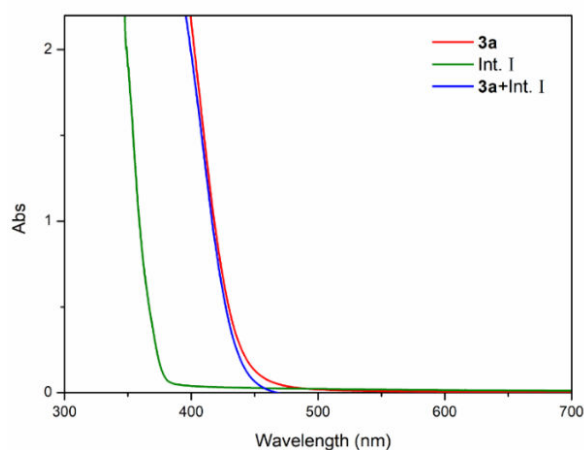

Figure S5. UV-Vis absorption spectra (UV-Vis absorption spectra of Int. **I**, **3a**, and the mixture of Int. **I** and **3a**).

### 5.3 Stern-Volmer quenching experiments

Emission intensities results were monitored by an F-7000 FL spectrophotometer. All Ir(ppy)<sub>2</sub>(dtbbpy)PF<sub>6</sub> solutions were excited at 410 nm and the emission intensity was collected at 500-700 nm (Figure S6). In general, Ir(ppy)<sub>2</sub>(dtbbpy)PF<sub>6</sub> ( $3 \times 10^{-5}$  M in DMSO) was added to the relative quencher in a 4.5 cm quartz cuvette. The results showed that the Breslow Intermediate **I** could quench the photoexcited Ir(ppy)<sub>2</sub>(dtbbpy)PF<sub>6</sub>, while diazo ester **3a** was less effective. And the fluorescence intensity of PC-**I** exhibited linear attenuation with increases in the concentration of Int. **I**.

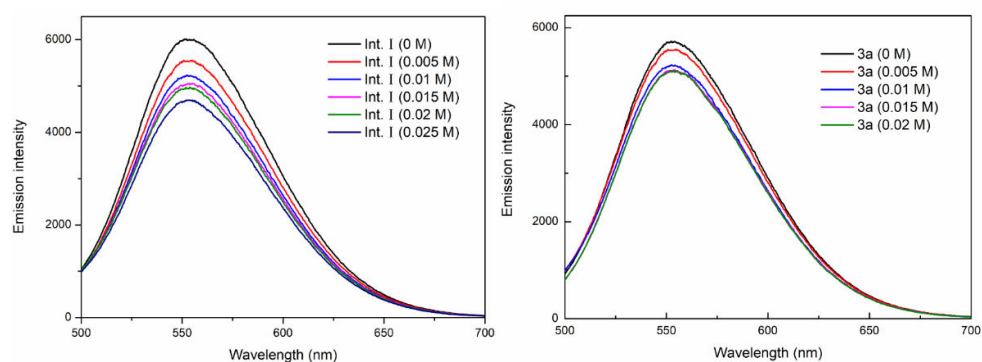

Figure S6. Stern-Volmer quenching experiments of Int. **I** and **3a** as the quencher.

## 6. Characterization of products

### Ethyl 2-(3-(4-chlorobenzoyl)bicyclo[1.1.1]pentan-1-yl)acetate (4a)

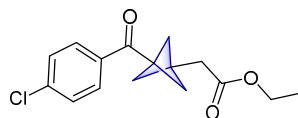

Product **4a** was isolated as a yellow oil (38.4 mg, 66%). <sup>1</sup>H NMR (400 MHz, Chloroform-*d*) δ 7.94–7.88 (m, 2H), 7.43–7.36 (m, 2H), 4.15 (q, *J* = 7.0 Hz, 2H), 2.57 (s, 2H), 2.27 (s, 6H), 1.27 (t, *J* = 7.0 Hz, 3H). <sup>13</sup>C NMR (100 MHz, Chloroform-*d*) δ 195.79, 170.85, 139.30, 134.79, 130.24, 128.75, 60.40, 54.20, 44.57, 37.05, 36.73, 14.29. HRMS (ESI) *m/z*: calcd for C<sub>16</sub>H<sub>18</sub>ClO<sub>3</sub> [M+H]<sup>+</sup> 293.0939, found: 293.0948.

### Ethyl 2-(3-(4-methylbenzoyl)bicyclo[1.1.1]pentan-1-yl)acetate (4b)

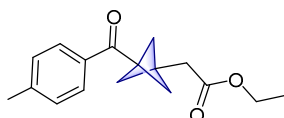

Product **4b** was isolated as a yellow oil (30.3 mg, 56%). <sup>1</sup>H NMR (400 MHz, Chloroform-*d*) δ 7.88 (d, *J* = 8.0 Hz, 2H), 7.23 (d, *J* = 8.0 Hz, 2H), 4.15 (q, *J* = 7.0 Hz, 2H), 2.57 (s, 2H), 2.39 (s, 3H), 2.27 (s, 6H), 1.27 (t, *J* = 7.0 Hz, 3H). <sup>13</sup>C NMR (100 MHz, Chloroform-*d*) δ 196.65, 170.98, 143.61, 134.03, 129.08, 128.99, 60.35, 54.20, 44.63, 37.18, 36.58, 21.59, 14.29. HRMS (ESI) *m/z*: calcd for C<sub>17</sub>H<sub>21</sub>O<sub>3</sub> [M+H]<sup>+</sup> 273.1485, found: 273.1494.

### Ethyl 2-(3-(4-fluorobenzoyl)bicyclo[1.1.1]pentan-1-yl)acetate (4c)

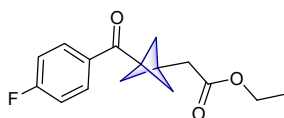

Product **4c** was isolated as a yellow oil (41.8 mg, 76%). <sup>1</sup>H NMR (400 MHz, Chloroform-*d*) δ 8.08–7.94 (m, 2H), 7.14–7.02 (m, 2H), 4.15 (q, *J* = 7.0 Hz, 2H), 2.57 (s, 2H), 2.27 (s, 6H), 1.26 (t, *J* = 7.0 Hz, 3H). <sup>13</sup>C NMR (100 MHz, Chloroform-*d*) δ 195.37, 170.87, 165.51 (d, *J* = 254.8 Hz), 132.90 (d, *J* = 3.0 Hz), 131.48 (d, *J* = 9.2 Hz), 115.52 (d, *J* = 21.8 Hz), 60.37, 54.19, 44.53, 37.05, 36.68, 14.27. <sup>19</sup>F NMR (376 MHz, Chloroform-*d*) δ -105.20. HRMS (ESI) *m/z*: calcd for C<sub>16</sub>H<sub>18</sub>FO<sub>3</sub> [M+H]<sup>+</sup> 277.1234, found: 277.1245.

### Ethyl 2-(3-benzoylbicyclo[1.1.1]pentan-1-yl)acetate (4d)

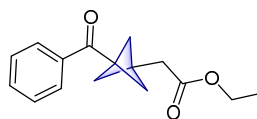

Product **4d** was isolated as a yellow oil (30.8 mg, 60%). <sup>1</sup>H NMR (400 MHz, Chloroform-*d*) δ 8.02–7.94 (m, 2H), 7.56–.50 (m, 1H), 7.46–7.40 (m, 2H), 4.15 (q, *J* = 7.0 Hz, 2H), 2.57 (s, 2H), 2.29 (s,

6H), 1.27 (t,  $J = 7.0$  Hz, 3H).  $^{13}\text{C}$  NMR (100 MHz, Chloroform- $d$ )  $\delta$  197.06, 170.93, 136.52, 132.80, 128.83, 128.39, 60.37, 54.20, 44.66, 37.15, 36.65, 14.30. HRMS (ESI)  $m/z$ : calcd for  $\text{C}_{16}\text{H}_{19}\text{O}_3$   $[\text{M}+\text{H}]^+$  259.1329, found: 259.1332.

**Ethyl 2-(3-(4-cyanobenzoyl)bicyclo[1.1.1]pentan-1-yl)acetate (4e)**

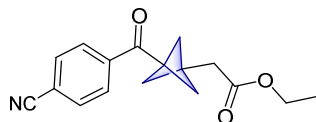

Product **4e** was isolated as a white solid (31.5 mg, 56%). M.p.: 43-45 °C;  $^1\text{H}$  NMR (400 MHz, Chloroform- $d$ )  $\delta$  8.03 (d,  $J = 8.4$  Hz, 2H), 7.73 (d,  $J = 8.4$  Hz, 2H), 4.15 (q,  $J = 7.0$  Hz, 2H), 2.58 (s, 2H), 2.29 (s, 6H), 1.27 (t,  $J = 7.0$  Hz, 3H).  $^{13}\text{C}$  NMR (100 MHz, Chloroform- $d$ )  $\delta$  195.80, 170.74, 139.52, 132.29, 129.13, 117.86, 116.10, 60.45, 54.17, 44.61, 36.93, 36.90, 14.28. HRMS (ESI)  $m/z$ : calcd for  $\text{C}_{17}\text{H}_{18}\text{NO}_3$   $[\text{M}+\text{H}]^+$  284.1281, found: 284.1260.

**Ethyl 2-(3-([1,1'-biphenyl]-4-carbonyl)bicyclo[1.1.1]pentan-1-yl)acetate (4f)**

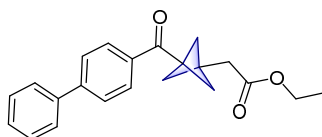

Product **4f** was isolated as a yellow oil (39.9 mg, 60%).  $^1\text{H}$  NMR (400 MHz, Chloroform- $d$ )  $\delta$  8.07 (d,  $J = 7.8$  Hz, 2H), 7.66 (d,  $J = 8.0$  Hz, 2H), 7.62 (d,  $J = 7.6$  Hz, 2H), 7.50–7.35 (m, 3H), 4.17 (q,  $J = 7.2$  Hz, 2H), 2.60 (s, 2H), 2.32 (s, 6H), 1.29 (t,  $J = 7.2$  Hz, 3H).  $^{13}\text{C}$  NMR (100 MHz, Chloroform- $d$ )  $\delta$  196.58, 170.94, 145.52, 139.88, 135.21, 129.44, 128.90, 128.16, 127.20, 127.05, 60.37, 54.23, 44.71, 37.15, 36.67, 14.30. HRMS (ESI)  $m/z$ : calcd for  $\text{C}_{22}\text{H}_{23}\text{O}_3$   $[\text{M}+\text{H}]^+$  335.1642, found: 335.1650.

**Ethyl 2-(3-(4-(methylthio)benzoyl)bicyclo[1.1.1]pentan-1-yl)acetate (4g)**

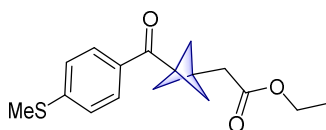

Product **4g** was isolated as a yellow oil (32.6 mg, 54%).  $^1\text{H}$  NMR (400 MHz, Chloroform- $d$ )  $\delta$  7.93–7.87 (m, 2H), 7.26–7.21 (m, 2H), 4.16 (q,  $J = 7.0$  Hz, 2H), 2.57 (s, 2H), 2.51 (s, 3H), 2.27 (s, 6H), 1.27 (t,  $J = 7.0$  Hz, 3H).  $^{13}\text{C}$  NMR (100 MHz, Chloroform- $d$ )  $\delta$  195.94, 170.95, 145.70, 132.85, 129.29, 124.94, 60.38, 54.24, 44.58, 37.18, 36.65, 14.77, 14.32. HRMS (ESI)  $m/z$ : calcd for  $\text{C}_{17}\text{H}_{21}\text{O}_3\text{S}$   $[\text{M}+\text{H}]^+$  305.1206, found: 305.1212.



**Ethyl 2-(3-(4-(trifluoromethoxy)benzoyl)bicyclo[1.1.1]pentan-1-yl)acetate (4h)**

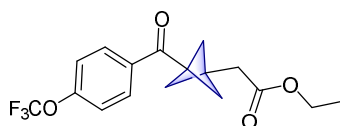

Product **4h** was isolated as a yellow oil (42.2 mg, 62%). <sup>1</sup>H NMR (400 MHz, Chloroform-*d*) δ 8.06–8.00 (m, 2H), 7.28–7.23 (m, 2H), 4.15 (q, *J* = 7.0 Hz, 2H), 2.58 (s, 2H), 2.28 (s, 6H), 1.27 (t, *J* = 7.0 Hz, 3H). <sup>13</sup>C NMR (100 MHz, Chloroform-*d*) δ 195.47, 170.85, 152.41 (d, *J* = 1.8 Hz), 134.76, 130.86, 120.30 (q, *J* = 257.0 Hz), 120.26, 60.42, 54.22, 44.58, 37.06, 36.79, 14.29. <sup>19</sup>F NMR (376 MHz, Chloroform-*d*) δ -57.65. HRMS (ESI) *m/z*: calcd for C<sub>17</sub>H<sub>18</sub>FO<sub>4</sub> [M+H]<sup>+</sup> 343.1152, found: 343.1162.

**Ethyl 2-(3-(4-(benzyloxy)benzoyl)bicyclo[1.1.1]pentan-1-yl)acetate (4i)**

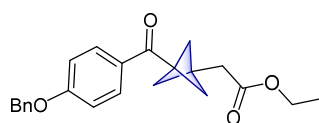

Product **4i** was isolated as a yellow oil (37.7 mg, 52%). <sup>1</sup>H NMR (400 MHz, Chloroform-*d*) δ 8.02–7.95 (m, 2H), 7.45–7.30 (m, 5H), 7.02–6.95 (m, 2H), 5.12 (s, 2H), 4.16 (q, *J* = 7.0 Hz, 2H), 2.57 (s, 2H), 2.27 (s, 6H), 1.28 (t, *J* = 7.0 Hz, 3H). <sup>13</sup>C NMR (100 MHz, Chloroform-*d*) δ 195.40, 170.97, 162.45, 136.18, 131.19, 129.77, 128.64, 128.17, 127.38, 114.48, 70.09, 60.33, 54.22, 44.51, 37.17, 36.56, 14.28. HRMS (ESI) *m/z*: calcd for C<sub>23</sub>H<sub>25</sub>O<sub>4</sub> [M+H]<sup>+</sup> 365.1747, found: 365.1753.

**Ethyl 2-(3-(4-(acetylbenzoyl)bicyclo[1.1.1]pentan-1-yl)acetate (4j)**

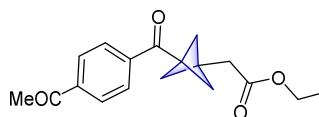

Product **4j** was isolated as a white solid (25.6 mg, 43%). M.p.: 68–70 °C; <sup>1</sup>H NMR (400 MHz, Chloroform-*d*) δ 8.10–7.93 (m, 4H), 4.15 (q, *J* = 7.0 Hz, 2H), 2.63 (s, 3H), 2.58 (s, 2H), 2.29 (s, 6H), 1.27 (t, *J* = 7.0 Hz, 3H). <sup>13</sup>C NMR (100 MHz, Chloroform-*d*) δ 197.43, 196.71, 170.88, 139.80, 139.70, 128.93, 128.28, 60.43, 54.13, 44.72, 37.00, 36.78, 26.83, 14.28. HRMS (ESI) *m/z*: calcd for C<sub>18</sub>H<sub>21</sub>O<sub>4</sub> [M+H]<sup>+</sup> 301.1434, found: 301.1422.

**Ethyl 2-(3-(3-bromobenzoyl)bicyclo[1.1.1]pentan-1-yl)acetate (4k)**

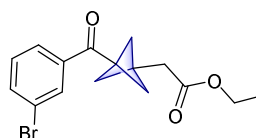

Product **4k** was isolated as a yellow oil (40.2 mg, 60%). <sup>1</sup>H NMR (400 MHz, Chloroform-*d*) δ 8.09–8.05 (m, 1H), 7.92–7.85 (m, 1H), 7.68–7.63 (m, 1H), 7.31 (t, *J* = 8.0 Hz, 1H), 4.15 (q, *J* = 7.2 Hz, 2H), 2.57 (s, 2H), 2.28 (s, 6H), 1.27 (t, *J* = 7.2 Hz, 3H). <sup>13</sup>C NMR (100 MHz, Chloroform-*d*) δ

195.72, 170.86, 138.22, 135.67, 131.77, 130.01, 127.35, 122.73, 60.43, 54.22, 44.56, 37.04, 36.77, 14.30. HRMS (ESI)  $m/z$ : calcd for  $C_{16}H_{18}BrO_3$   $[M+H]^+$  337.0434, found: 337.0442.

**Ethyl 2-(3-(3-methoxybenzoyl)bicyclo[1.1.1]pentan-1-yl)acetate (4l)**

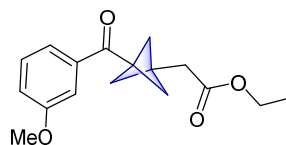

Product **4l** was isolated as a yellow oil (30.0 mg, 52%).  $^1H$  NMR (400 MHz, Chloroform-*d*)  $\delta$  7.58 (d,  $J = 7.6$  Hz, 1H), 7.50–7.44 (m, 1H), 7.33 (t,  $J = 7.6$  Hz, 1H), 7.08 (dd,  $J = 8.2, 2.6$  Hz, 1H), 4.15 (q,  $J = 7.0$  Hz, 2H), 3.83 (s, 3H), 2.57 (s, 2H), 2.28 (s, 6H), 1.27 (t,  $J = 7.0$  Hz, 3H).  $^{13}C$  NMR (100 MHz, Chloroform-*d*)  $\delta$  196.83, 170.91, 159.65, 137.80, 129.36, 121.56, 119.28, 113.11, 60.37, 55.36, 54.25, 44.69, 37.15, 36.59, 14.30. HRMS (ESI)  $m/z$ : calcd for  $C_{17}H_{21}O_4$   $[M+H]^+$  289.1434, found: 289.1439.

**Ethyl 2-(3-(2-fluorobenzoyl)bicyclo[1.1.1]pentan-1-yl)acetate (4m)**

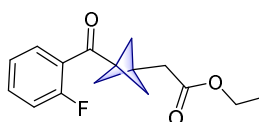

Product **4m** was isolated as a yellow oil (35.8 mg, 65%).  $^1H$  NMR (400 MHz, Chloroform-*d*)  $\delta$  7.63–7.56 (m, 1H), 7.51–7.41 (m, 1H), 7.21–7.15 (m, 1H), 7.13–7.06 (m, 1H), 4.13 (q,  $J = 7.0$  Hz, 2H), 2.54 (s, 2H), 2.17 (s, 6H), 1.25 (t,  $J = 7.0$  Hz, 3H).  $^{13}C$  NMR (100 MHz, Chloroform-*d*)  $\delta$  197.46 (d,  $J = 2.0$  Hz), 170.90, 160.29 (d,  $J = 253.8$  Hz), 133.55 (d,  $J = 8.8$  Hz), 130.24 (d,  $J = 3.4$  Hz), 126.22 (d,  $J = 15.8$  Hz), 124.19 (d,  $J = 3.6$  Hz), 116.34 (d,  $J = 22.4$  Hz), 60.33, 52.87 (d,  $J = 3.2$  Hz), 45.41, 37.21, 35.89 (d,  $J = 2.8$  Hz), 14.28.  $^{19}F$  NMR (376 MHz, Chloroform-*d*)  $\delta$  -109.53. HRMS (ESI)  $m/z$ : calcd for  $C_{16}H_{18}FO_3$   $[M+H]^+$  277.1234, found: 277.1244.

**Ethyl 2-(3-(3,5-difluorobenzoyl)bicyclo[1.1.1]pentan-1-yl)acetate (4n)**

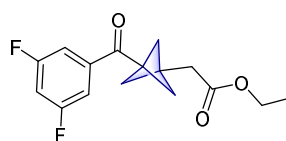

Product **4n** was isolated as a yellow oil (37.5 mg, 64%).  $^1H$  NMR (400 MHz, Chloroform-*d*)  $\delta$  7.50–7.41 (m, 2H), 7.02–6.95 (m, 1H), 4.15 (q,  $J = 7.0$  Hz, 2H), 2.58 (s, 2H), 2.28 (s, 6H), 1.27 (t,  $J = 7.0$  Hz, 3H).  $^{13}C$  NMR (100 MHz, Chloroform-*d*)  $\delta$  194.47 (t,  $J = 2.2$  Hz), 170.76, 162.82 (dd,  $J = 250.8, 11.8$  Hz), 139.15 (t,  $J = 7.6$  Hz), 111.72 (dd,  $J = 25.0, 7.0$  Hz), 108.14 (t,  $J = 25.4$  Hz), 60.46, 54.23, 44.52, 36.95, 36.80, 14.29.  $^{19}F$  NMR (376 MHz, Chloroform-*d*)  $\delta$  -107.97. HRMS (ESI)  $m/z$ : calcd for  $C_{16}H_{17}F_2O_3$   $[M+H]^+$  295.1140, found: 295.1144.

**Ethyl 2-(3-(3,5-dimethylbenzoyl)bicyclo[1.1.1]pentan-1-yl)acetate (4o)**

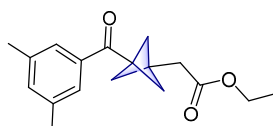

Product **4o** was isolated as a yellow oil (23.2 mg, 41%). <sup>1</sup>H NMR (400 MHz, Chloroform-*d*) δ 7.59–7.53 (m, 2H), 7.21–7.13 (m, 1H), 4.16 (q, *J* = 7.0 Hz, 2H), 2.57 (s, 2H), 2.35 (s, 6H), 2.27 (s, 6H), 1.28 (t, *J* = 7.0 Hz, 3H). <sup>13</sup>C NMR (100 MHz, Chloroform-*d*) δ 197.55, 171.01, 138.02, 136.74, 134.45, 126.56, 60.36, 54.24, 44.72, 37.19, 36.56, 21.23, 14.29. HRMS (ESI) *m/z*: calcd for C<sub>18</sub>H<sub>23</sub>O<sub>3</sub> [M+H]<sup>+</sup> 287.1642, found: 287.1643.

**Ethyl 2-(3-(quinoline-6-carbonyl)bicyclo[1.1.1]pentan-1-yl)acetate (4p)**

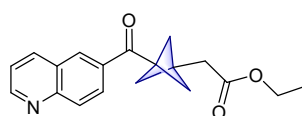

Product **4p** was isolated as a yellow oil (30.2 mg, 49%). <sup>1</sup>H NMR (400 MHz, Chloroform-*d*) δ 9.05–8.94 (m, 1H), 8.54–8.43 (m, 1H), 8.31–8.20 (m, 2H), 8.13 (d, *J* = 8.8 Hz, 1H), 7.51–7.43 (m, 1H), 4.17 (q, *J* = 7.2 Hz, 2H), 2.61 (s, 2H), 2.37 (s, 6H), 1.28 (t, *J* = 7.2 Hz, 3H). <sup>13</sup>C NMR (100 MHz, Chloroform-*d*) δ 196.48, 170.93, 152.54, 149.88, 137.55, 134.41, 130.28, 129.92, 128.29, 127.39, 121.89, 60.43, 54.36, 44.79, 37.08, 36.82, 14.31. HRMS (ESI) *m/z*: calcd for C<sub>19</sub>H<sub>20</sub>NO<sub>3</sub> [M+H]<sup>+</sup> 310.1438, found: 310.1449.

**Ethyl 2-(3-(2-naphthoyl)bicyclo[1.1.1]pentan-1-yl)acetate (4q)**

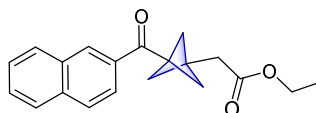

Product **4q** was isolated as a yellow oil (27.0 mg, 44%). <sup>1</sup>H NMR (400 MHz, Chloroform-*d*) δ 8.53 (s, 1H), 8.02 (dd, *J* = 8.6, 1.6 Hz, 1H), 7.95 (d, *J* = 8.0 Hz, 1H), 7.90–7.83 (m, 2H), 7.62–7.51 (m, 2H), 4.18 (q, *J* = 7.2 Hz, 2H), 2.62 (s, 2H), 2.37 (s, 6H), 1.29 (t, *J* = 7.2 Hz, 3H). <sup>13</sup>C NMR (100 MHz, Chloroform-*d*) δ 197.00, 170.98, 135.39, 133.94, 132.40, 130.65, 129.56, 128.41, 128.29, 127.75, 126.69, 124.48, 60.39, 54.39, 44.80, 37.19, 36.72, 14.31. HRMS (ESI) *m/z*: calcd for C<sub>20</sub>H<sub>21</sub>O<sub>3</sub>[M+H]<sup>+</sup> 309.1485, found: 309.1492.

**Ethyl 2-(3-(2,3-dihydrobenzo[b][1,4]dioxine-6-carbonyl)bicyclo[1.1.1]pentan-1-yl)acetate (4r)**

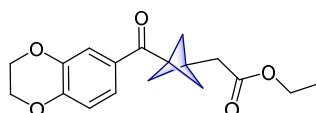

Product **4r** was isolated as a yellow oil (28.9 mg, 46%). <sup>1</sup>H NMR (400 MHz, Chloroform-*d*) δ 7.58–7.49 (m, 2H), 6.88 (d, *J* = 9.0 Hz, 1H), 4.33–4.23 (m, 4H), 4.15 (q, *J* = 7.0 Hz, 2H), 2.56 (s, 2H), 2.25 (s, 6H), 1.27 (t, *J* = 7.0 Hz, 3H). <sup>13</sup>C NMR (100 MHz, Chloroform-*d*) δ 195.32, 170.98, 147.89,

143.16, 130.32, 123.13, 118.43, 117.10, 64.69, 64.10, 60.36, 54.28, 44.53, 37.22, 36.55, 14.31.  
HRMS (ESI)  $m/z$ : calcd for  $C_{18}H_{21}O_5[M+H]^+$  317.1384, found: 317.1385.

**Ethyl 2-(3-(1-methyl-1H-indole-3-carbonyl)bicyclo[1.1.1]pentan-1-yl)acetate (4s)**

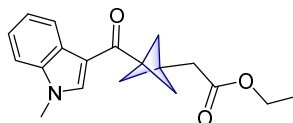

Product **4s** was isolated as a yellow solid (24.7 mg, 40%). M.p.: 92–94 °C;  $^1H$  NMR (400 MHz, Chloroform-*d*)  $\delta$  10.29 (s, 1H), 8.50–8.27 (m, 1H), 7.32–7.24 (m, 3H), 4.18 (q,  $J = 7.0$  Hz, 2H), 3.81 (s, 3H), 2.64 (s, 2H), 2.50 (s, 6H), 1.30 (t,  $J = 7.0$  Hz, 3H).  $^{13}C$  NMR (100 MHz, Chloroform-*d*)  $\delta$  185.55, 170.83, 147.02, 137.15, 125.27, 123.71, 123.05, 122.35, 116.73, 108.88, 60.53, 55.34, 39.14, 36.96, 36.70, 31.10, 14.30. HRMS (ESI)  $m/z$ : calcd for  $C_{19}H_{22}NO_3 [M+H]^+$  312.1594, found: 312.1595.

**Ethyl 2-(3-(thiophene-3-carbonyl)bicyclo[1.1.1]pentan-1-yl)acetate (4t)**

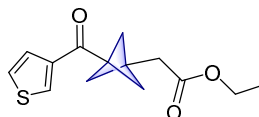

Product **4t** was isolated as a yellow oil (25.3 mg, 48%).  $^1H$  NMR (400 MHz, Chloroform-*d*)  $\delta$  8.12 (dd,  $J = 2.8, 1.2$  Hz, 1H), 7.57 (dd,  $J = 5.0, 1.2$  Hz, 1H), 7.29 (dd,  $J = 5.0, 2.8$  Hz, 1H), 4.15 (q,  $J = 7.0$  Hz, 2H), 2.57 (s, 2H), 2.24 (s, 6H), 1.27 (t,  $J = 7.0$  Hz, 3H).  $^{13}C$  NMR (100 MHz, Chloroform-*d*)  $\delta$  191.16, 170.89, 140.89, 132.74, 127.55, 125.84, 60.37, 53.75, 44.53, 37.13, 36.28, 14.29. HRMS (ESI)  $m/z$ : calcd for  $C_{14}H_{17}O_3S [M+H]^+$  265.0893, found: 265.0906.

**Ethyl 2-(3-(1-methyl-3a,7a-dihydro-1H-indazole-3-carbonyl)bicyclo[1.1.1]pentan-1-yl)acetate (4u)**

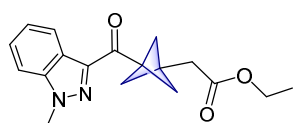

Product **4u** was isolated as a yellow oil (31.2 mg, 50%).  $^1H$  NMR (400 MHz, Chloroform-*d*)  $\delta$  8.34 (d,  $J = 8.0$  Hz, 1H), 7.45–7.38 (m, 2H), 7.34–7.27 (m, 1H), 4.21–4.10 (m, 5H), 2.60 (s, 2H), 2.34 (s, 6H), 1.29 (t,  $J = 7.2$  Hz, 3H).  $^{13}C$  NMR (100 MHz, Chloroform-*d*)  $\delta$  193.12, 171.28, 141.34, 140.46, 126.74, 123.51, 123.48, 122.90, 109.05, 60.30, 53.74, 44.22, 37.53, 36.49, 36.42, 14.33. HRMS (ESI)  $m/z$ : calcd for  $C_{18}H_{21}N_2O_3[M+H]^+$  313.1547, found: 313.1551.

#### Ethyl 2-(3-nicotinoylbicyclo[1.1.1]pentan-1-yl)acetate (4v)

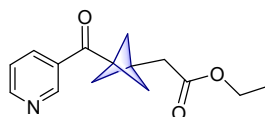

Product **4v** was isolated as a yellow oil (26.8 mg, 52%). <sup>1</sup>H NMR (400 MHz, Chloroform-*d*) δ 9.22–9.17 (m, 1H), 8.76–8.71 (m, 1H), 8.20 (dt, *J* = 8.0, 1.8 Hz, 1H), 7.38 (dd, *J* = 8.0, 4.8 Hz, 1H), 4.14 (q, *J* = 7.0 Hz, 2H), 2.57 (s, 2H), 2.29 (s, 6H), 1.26 (t, *J* = 7.0 Hz, 3H). <sup>13</sup>C NMR (100 MHz, Chloroform-*d*) δ 195.88, 170.71, 153.13, 150.13, 135.95, 132.00, 123.55, 60.41, 54.03, 44.54, 37.02, 36.91, 14.27. HRMS (ESI) *m/z*: calcd for C<sub>15</sub>H<sub>18</sub>NO<sub>3</sub> [M+H]<sup>+</sup> 260.1281, found: 260.1294.

#### Ethyl 2-(3-(1-methyl-1H-pyrazole-3-carbonyl)bicyclo[1.1.1]pentan-1-yl)acetate (4w)

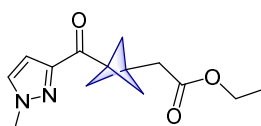

Product **4w** was isolated as a yellow oil (28.7 mg, 55%). <sup>1</sup>H NMR (400 MHz, Chloroform-*d*) δ 7.32 (d, *J* = 2.4 Hz, 1H), 6.75 (d, *J* = 2.4 Hz, 1H), 4.14 (q, *J* = 7.0 Hz, 2H), 3.94 (s, 3H), 2.54 (s, 2H), 2.24 (s, 6H), 1.26 (t, *J* = 7.0 Hz, 3H). <sup>13</sup>C NMR (100 MHz, Chloroform-*d*) δ 191.99, 171.13, 150.43, 130.81, 107.74, 60.25, 53.60, 44.02, 39.53, 37.49, 36.43, 14.30. HRMS (ESI) *m/z*: calcd for C<sub>14</sub>H<sub>19</sub>N<sub>2</sub>O<sub>3</sub> [M+H]<sup>+</sup> 263.1390, found: 263.1397.

#### Adamantan-1-yl 2-(3-(4-fluorobenzoyl)bicyclo[1.1.1]pentan-1-yl)acetate (4x)

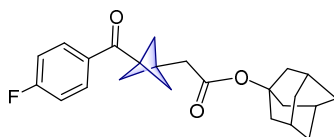

Product **4x** was isolated as a yellow oil (54.0 mg, 71%). <sup>1</sup>H NMR (400 MHz, Chloroform-*d*) δ 8.08–7.95 (m, 2H), 7.10 (t, *J* = 8.0 Hz, 2H), 2.48 (s, 2H), 2.27 (s, 6H), 2.19–2.08 (m, 9H), 1.69–1.63 (m, 6H). <sup>13</sup>C NMR (100 MHz, Chloroform-*d*) δ 195.61, 169.99, 165.49 (d, *J* = 254.8 Hz), 132.87 (d, *J* = 3.0 Hz), 131.51 (d, *J* = 9.4 Hz), 115.53 (d, *J* = 21.8 Hz), 80.83, 54.18, 44.57, 41.45, 38.54, 36.92, 36.12, 30.76. <sup>19</sup>F NMR (376 MHz, Chloroform-*d*) δ -105.17. HRMS (ESI) *m/z*: calcd for C<sub>24</sub>H<sub>28</sub>FO<sub>3</sub> [M+H]<sup>+</sup> 383.2017, found: 383.2021.

#### Tert-butyl 2-(3-(4-fluorobenzoyl)bicyclo[1.1.1]pentan-1-yl)acetate (4y)

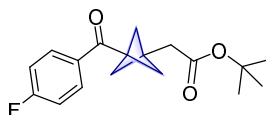

Product **4y** was isolated as a yellow oil (40.6 mg, 67%). <sup>1</sup>H NMR (400 MHz, Chloroform-*d*) δ 8.05–7.96 (m, 2H), 7.14–7.04 (m, 2H), 2.48 (s, 2H), 2.26 (s, 6H), 1.46 (s, 9H). <sup>13</sup>C NMR (100 MHz, Chloroform-*d*) δ 195.51, 170.19, 165.51 (d, *J* = 254.8 Hz), 132.94 (d, *J* = 3.0 Hz), 131.48 (d, *J* = 9.2 Hz), 115.52 (d, *J* = 21.8 Hz), 80.66, 54.20, 44.56, 38.44, 36.93, 28.17. <sup>19</sup>F NMR (376 MHz,

Chloroform-*d*)  $\delta$  -105.23. HRMS (ESI) *m/z*: calcd for C<sub>18</sub>H<sub>22</sub>FO<sub>3</sub> [M+H]<sup>+</sup> 305.1547, found: 305.1566.

**2,4-dimethylpentan-3-yl 2-(3-(4-fluorobenzoyl)bicyclo[1.1.1]pentan-1-yl)acetate (4z)**

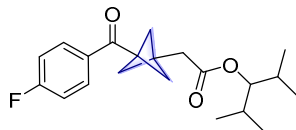

Product **4z** was isolated as a yellow oil (34.5 mg, 50%). <sup>1</sup>H NMR (400 MHz, Chloroform-*d*)  $\delta$  8.11–7.93 (m, 2H), 7.18–7.01 (m, 2H), 4.62 (t, *J* = 6.2 Hz, 1H), 2.63 (s, 2H), 2.30 (s, 6H), 1.95–1.83 (m, 2H), 0.91–0.82 (m, 12H). <sup>13</sup>C NMR (100 MHz, Chloroform-*d*)  $\delta$  195.51, 171.06, 165.51 (d, *J* = 254.8 Hz), 132.84 (d, *J* = 3.0 Hz), 131.52 (d, *J* = 9.2 Hz), 115.55 (d, *J* = 21.8 Hz), 82.93, 54.30, 44.75, 37.04, 36.76, 29.26, 19.55, 17.32. <sup>19</sup>F NMR (376 MHz, Chloroform-*d*)  $\delta$  -105.13. HRMS (ESI) *m/z*: calcd for C<sub>21</sub>H<sub>28</sub>FO<sub>3</sub> [M+H]<sup>+</sup> 347.2017, found: 347.1999.

**Cyclohexyl 2-(3-(4-fluorobenzoyl)bicyclo[1.1.1]pentan-1-yl)acetate (4aa)**

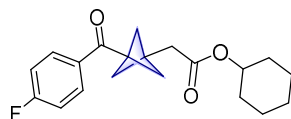

Product **4aa** was isolated as a yellow oil (50.0 mg, 76%). <sup>1</sup>H NMR (400 MHz, Chloroform-*d*)  $\delta$  8.07–7.95 (m, 2H), 7.16–7.04 (m, 2H), 4.83–4.74 (m, 1H), 2.56 (s, 2H), 2.28 (s, 6H), 1.91–1.82 (m, 2H), 1.76–1.69 (m, 2H), 1.58–1.51 (m, 1H), 1.44–1.23 (m, 5H). <sup>13</sup>C NMR (100 MHz, Chloroform-*d*)  $\delta$  195.51, 170.40, 165.52 (d, *J* = 254.8 Hz), 132.85 (d, *J* = 3.0 Hz), 131.52 (d, *J* = 9.4 Hz), 115.56 (d, *J* = 22.0 Hz), 72.89, 54.22, 44.56, 37.53, 36.82, 31.75, 25.30, 23.76. <sup>19</sup>F NMR (376 MHz, Chloroform-*d*)  $\delta$  -105.12. HRMS (ESI) *m/z*: calcd for C<sub>20</sub>H<sub>24</sub>FO<sub>3</sub> [M+H]<sup>+</sup> 331.1704, found: 331.1678.

**Benzyl 2-(3-(4-fluorobenzoyl)bicyclo[1.1.1]pentan-1-yl)acetate (4ab)**

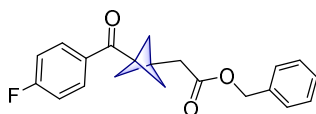

Product **4ab** was isolated as a yellow oil (43.0 mg, 64%). <sup>1</sup>H NMR (400 MHz, Chloroform-*d*)  $\delta$  8.03–7.94 (m, 2H), 7.40–7.33 (m, 5H), 7.14–7.06 (m, 2H), 5.15 (s, 2H), 2.64 (s, 2H), 2.25 (s, 6H). <sup>13</sup>C NMR (100 MHz, Chloroform-*d*)  $\delta$  195.32, 170.72, 165.54 (d, *J* = 254.8 Hz), 135.86, 132.85 (d, *J* = 3.0 Hz), 131.51 (d, *J* = 9.2 Hz), 128.58, 128.44, 128.34, 115.53 (d, *J* = 21.8 Hz), 66.35, 54.21, 44.57, 37.07, 36.69. <sup>19</sup>F NMR (376 MHz, Chloroform-*d*)  $\delta$  -105.11. HRMS (ESI) *m/z*: calcd for C<sub>21</sub>H<sub>20</sub>FO<sub>3</sub> [M+H]<sup>+</sup> 339.1391, found: 339.1395.

### 1-phenylethyl 2-(3-(4-fluorobenzoyl)bicyclo[1.1.1]pentan-1-yl)acetate (4ac)

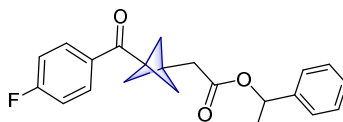

Product **4ac** was isolated as a yellow oil (53.3 mg, 76%). <sup>1</sup>H NMR (400 MHz, Chloroform-*d*) δ 8.05–7.91 (m, 2H), 7.41–7.28(m, 5H), 7.15–7.04 (m, 2H), 5.93 (q, *J* = 6.2 Hz, 1H), 2.61 (s, 2H), 2.24 (s, 6H), 1.57 (d, *J* = 6.2 Hz, 3H). <sup>13</sup>C NMR (100 MHz, Chloroform-*d*) δ 195.32, 170.12, 165.47 (d, *J* = 254.8 Hz), 141.36, 132.76 (d, *J* = 3.0 Hz), 131.48 (d, *J* = 9.2 Hz), 128.47, 127.96, 126.21, 115.50 (d, *J* = 21.8 Hz), 72.50, 54.17, 44.56, 37.31, 36.70, 22.08. <sup>19</sup>F NMR (376 MHz, Chloroform-*d*) δ -105.08. HRMS (ESI) *m/z*: calcd for C<sub>22</sub>H<sub>21</sub>FN<sub>3</sub>O<sub>3</sub> [M+Na]<sup>+</sup> 375.1367, found: 375.1371.

### Thiophen-2-ylmethyl 2-(3-(4-fluorobenzoyl)bicyclo[1.1.1]pentan-1-yl)acetate (4ad)

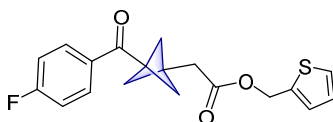

Product **4ad** was isolated as a yellow oil (34.1 mg, 52%). <sup>1</sup>H NMR (400 MHz, Chloroform-*d*) δ 8.03–7.94 (m, 2H), 7.37–7.30 (m, 1H), 7.14–7.06 (m, 3H), 7.03–6.95 (m, 1H), 5.30 (s, 2H), 2.61 (s, 2H), 2.24 (s, 6H). <sup>13</sup>C NMR (100 MHz, Chloroform-*d*) δ 195.33, 170.57, 165.51 (d, *J* = 254.8 Hz), 137.78, 132.76 (d, *J* = 2.8 Hz), 131.52 (d, *J* = 9.2 Hz), 128.40, 126.93, 126.83, 115.54 (d, *J* = 21.8 Hz), 60.37, 54.19, 44.57, 37.01, 36.63. <sup>19</sup>F NMR (376 MHz, Chloroform-*d*) δ -105.09. HRMS (ESI) *m/z*: calcd for C<sub>19</sub>H<sub>18</sub>FO<sub>3</sub>S [M+H]<sup>+</sup> 345.0955, found: 345.0954.

### Tetrahydrofuran-3-yl 2-(3-(4-fluorobenzoyl)bicyclo[1.1.1]pentan-1-yl)acetate (4ae)

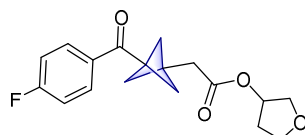

Product **4ae** was isolated as a yellow oil (39.8 mg, 63%). <sup>1</sup>H NMR (400 MHz, Chloroform-*d*) δ 8.06–7.94 (m, 2H), 7.16–7.03 (m, 2H), 5.35–5.24 (m, 1H), 3.95–3.77 (m, 4H), 2.59 (s, 2H), 2.27 (s, 6H), 2.21–2.13 (m, 1H), 2.03–1.96 (m, 1H). <sup>13</sup>C NMR (100 MHz, Chloroform-*d*) δ 195.27, 170.68, 165.49 (d, *J* = 254.8 Hz), 132.75 (d, *J* = 2.8 Hz), 131.47 (d, *J* = 9.4 Hz), 115.55 (d, *J* = 21.8 Hz), 74.92, 73.14, 66.94, 54.17, 44.58, 37.00, 36.57, 32.72. <sup>19</sup>F NMR (376 MHz, Chloroform-*d*) δ -105.03. HRMS (ESI) *m/z*: calcd for C<sub>18</sub>H<sub>20</sub>FO<sub>4</sub> [M+H]<sup>+</sup> 319.1340, found: 319.1345.

**3,3,4,4,5,5,6,6,7,7,8,8,8-tridecafluorooctyl 2-(3-(4-fluorobenzoyl)bicyclo[1.1.1]pentan-1-yl)acetate (4af)**

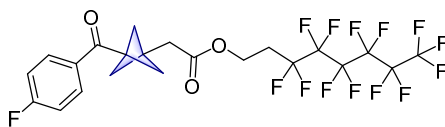

Product **4af** was isolated as a white solid (68.6 mg, 58%). M.p.: 42-44 °C; <sup>1</sup>H NMR (400 MHz, Chloroform-*d*) δ 8.07–7.95 (m, 2H), 7.18–7.03 (m, 2H), 4.41 (td, *J* = 6.6, 2.4 Hz, 2H), 2.63 (s, 2H), 2.56–2.41 (m, 2H), 2.29 (s, 6H). <sup>13</sup>C NMR (100 MHz, Chloroform-*d*) δ 195.30, 170.56, 165.58 (d, *J* = 254.8 Hz), 132.78 (d, *J* = 3.0 Hz), 131.52 (d, *J* = 9.2 Hz), 115.58 (d, *J* = 21.8 Hz), 56.34, 54.16, 44.60, 36.72, 36.40, 30.53 (t, *J* = 21.8 Hz). <sup>13</sup>C-NMR for CF<sub>2</sub>CF<sub>2</sub>CF<sub>2</sub>CF<sub>2</sub>CF<sub>2</sub>CF<sub>3</sub> could not be assigned. <sup>19</sup>F NMR (376 MHz, Chloroform-*d*) δ -80.49 – -80.97 (m, 3F), -105.05 (s, 1F), -112.56 – -114.70 (m, 2F), -121.24 – -122.12 (m, 2F), -122.24 – -123.22 (m, 2F), -123.30 – -124.69 (m, 2F), -125.92 – -126.32 (m, 2F). HRMS (ESI) *m/z*: calcd for C<sub>22</sub>H<sub>17</sub>F<sub>14</sub>O<sub>3</sub> [M+H]<sup>+</sup> 595.0949, found: 595.0954.

**2-(trimethylsilyl)ethyl 2-(3-(4-fluorobenzoyl)bicyclo[1.1.1]pentan-1-yl)acetate (4ag)**

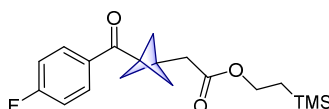

Product **4ag** was isolated as a yellow oil (43.7 mg, 62%). <sup>1</sup>H NMR (400 MHz, Chloroform-*d*) δ 8.07–7.94 (m, 2H), 7.15–7.02 (m, 2H), 4.21–4.15 (m, 2H), 2.56 (s, 2H), 2.27 (s, 6H), 1.03–0.96 (m, 2H), 0.04 (s, 9H). <sup>13</sup>C NMR (100 MHz, Chloroform-*d*) δ 195.41, 171.08, 165.48 (d, *J* = 254.8 Hz), 132.81 (d, *J* = 3.2 Hz), 131.49 (d, *J* = 9.2 Hz), 115.51 (d, *J* = 21.8 Hz), 62.64, 54.17, 44.57, 37.10, 36.68, 17.45, -1.57. <sup>19</sup>F NMR (376 MHz, Chloroform-*d*) δ -105.12. HRMS (ESI) *m/z*: calcd for C<sub>19</sub>H<sub>26</sub>FO<sub>3</sub>Si [M+H]<sup>+</sup> 349.1630, found: 349.1645.

**But-2-yn-1-yl 2-(3-(4-fluorobenzoyl)bicyclo[1.1.1]pentan-1-yl)acetate (4ah)**

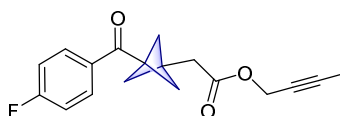

Product **4ah** was isolated as a yellow oil (43.7 mg, 73%). <sup>1</sup>H NMR (400 MHz, Chloroform-*d*) δ 8.06–7.94 (m, 2H), 7.16–7.02 (m, 2H), 4.65 (s, 2H), 2.61 (s, 2H), 2.28 (s, 6H), 1.84 (s, 3H). <sup>13</sup>C NMR (100 MHz, Chloroform-*d*) δ 195.34, 170.30, 165.50 (d, *J* = 254.8 Hz), 132.79 (d, *J* = 3.0 Hz), 131.50 (d, *J* = 9.2 Hz), 115.54 (d, *J* = 21.8 Hz), 83.25, 73.03, 54.17, 52.72, 44.58, 36.69, 36.53, 3.59. <sup>19</sup>F NMR (376 MHz, Chloroform-*d*) δ -105.08. HRMS (ESI) *m/z*: calcd for C<sub>18</sub>H<sub>18</sub>FO<sub>3</sub> [M+H]<sup>+</sup> 301.1234, found: 301.1253.



**(3*R*,5*S*,8*R*,9*S*,10*S*,13*S*,14*S*)-10,13-dimethyl-17-oxohexadecahydro-1*H*-cyclopenta[*a*]phenanthren-3-yl 2-(3-(4-fluorobenzoyl)bicyclo[1.1.1]pentan-1-yl)acetate (4am)**

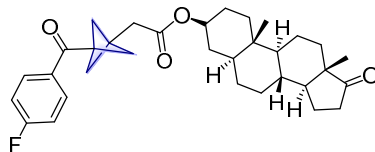

Product **4am** was isolated as a yellow oil (72.4 mg, 70%). <sup>1</sup>H NMR (400 MHz, Chloroform-*d*) δ 8.11–7.89 (m, 2H), 7.18–6.98 (m, 2H), 4.79–4.64 (m, 1H), 2.54 (s, 2H), 2.42 (dd, *J* = 19.4, 8.8 Hz, 1H), 2.26 (s, 6H), 2.08–2.01 (m, 1H), 1.96–1.87 (m, 1H), 1.84–1.70 (m, 4H), 1.65–1.44 (m, 5H), 1.39–1.18 (m, 7H), 1.08–0.93 (m, 2H), 0.84 (s, 6H), 0.75–0.65 (m, 1H). <sup>13</sup>C NMR (100 MHz, Chloroform-*d*) δ 221.14, 195.43, 170.39, 165.48 (d, *J* = 254.8 Hz), 132.80 (d, *J* = 3.0 Hz), 131.48 (d, *J* = 9.2 Hz), 115.53 (d, *J* = 21.8 Hz), 73.64, 54.21, 54.18, 51.27, 47.70, 44.60, 44.50, 37.44, 36.76, 36.61, 35.77, 35.58, 34.94, 34.04, 31.44, 30.72, 28.20, 27.52, 21.70, 20.39, 13.74, 12.16. <sup>19</sup>F NMR (376 MHz, Chloroform-*d*) δ -105.04. HRMS (ESI) *m/z*: calcd for C<sub>33</sub>H<sub>42</sub>FO<sub>4</sub> [M+H]<sup>+</sup> 521.3062, found: 521.3062.

**(*E*)-3,7-dimethylocta-2,6-dien-1-yl 2-(3-(4-fluorobenzoyl)bicyclo[1.1.1]pentan-1-yl)acetate (4an)**

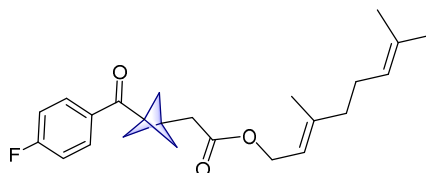

Product **4an** was isolated as a yellow oil (54.3 mg, 71%). <sup>1</sup>H NMR (400 MHz, Chloroform-*d*) δ 8.06–7.96 (m, 2H), 7.15–7.03 (m, 2H), 5.34 (t, *J* = 6.8 Hz, 1H), 5.07 (t, *J* = 7.2 Hz, 1H), 4.61 (d, *J* = 7.2 Hz, 2H), 2.58 (s, 2H), 2.27 (s, 6H), 2.13–2.01 (m, 4H), 1.70 (s, 3H), 1.66 (s, 3H), 1.57 (s, 3H). <sup>13</sup>C NMR (100 MHz, Chloroform-*d*) δ 195.39, 170.92, 165.48 (d, *J* = 254.8 Hz), 142.48, 132.82 (d, *J* = 3.0 Hz), 131.81, 131.48 (d, *J* = 9.2 Hz), 123.60, 118.14, 115.51 (d, *J* = 21.8 Hz), 61.31, 54.19, 44.55, 39.46, 37.03, 36.70, 26.24, 25.61, 17.63, 16.44. <sup>19</sup>F NMR (376 MHz, Chloroform-*d*) δ -105.14. HRMS (ESI) *m/z*: calcd for C<sub>24</sub>H<sub>30</sub>FO<sub>3</sub> [M+H]<sup>+</sup> 385.2173, found: 385.2179.

**2-((1*R*,5*S*)-6,6-dimethylbicyclo[3.1.1]hept-2-en-2-yl)ethyl 2-(3-(4-fluorobenzoyl)bicyclo[1.1.1]pentan-1-yl)acetate (4ao)**

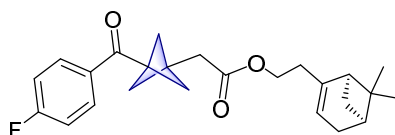

Product **4ao** was isolated as a yellow oil (33.0 mg, 42%). <sup>1</sup>H NMR (400 MHz, Chloroform-*d*) δ 8.09–7.95 (m, 2H), 7.18–7.03 (m, 2H), 5.34–5.26 (m, 1H), 4.17–4.03 (m, 2H), 2.57 (s, 2H), 2.40–2.33 (m, 1H), 2.32–2.25 (m, 8H), 2.24–2.14 (m, 2H), 2.10–2.02 (m, 2H), 1.26 (s, 3H), 1.14 (d, *J* = 8.6 Hz, 1H), 0.82 (s, 3H). <sup>13</sup>C NMR (100 MHz, Chloroform-*d*) δ 195.46, 170.98, 165.52 (d, *J* =

254.8 Hz), 143.92, 132.82 (d,  $J = 3.2$  Hz), 131.52 (d,  $J = 9.2$  Hz), 118.81, 115.55 (d,  $J = 22.0$  Hz), 62.70, 54.20, 45.57, 44.60, 40.64, 37.98, 37.00, 36.63, 35.97, 31.58, 31.30, 26.22, 21.08.  $^{19}\text{F}$  NMR (376 MHz, Chloroform- $d$ )  $\delta$  -105.09. HRMS (ESI)  $m/z$ : calcd for  $\text{C}_{25}\text{H}_{30}\text{FO}_3$   $[\text{M}+\text{H}]^+$  397.2173, found: 397.2166.

**4-(3-(2-ethoxy-2-oxoethyl)bicyclo[1.1.1]pentane-1-carbonyl)phenyl (S)-2-(6-methoxynaphthalen-2-yl)propanoate (4ap)**

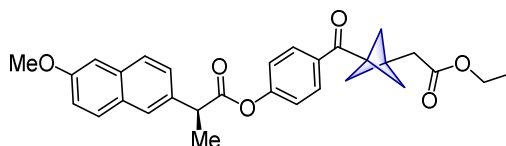

With DMSO as the solvent, product **4ap** was isolated as a yellow oil (24.2 mg, 25%).  $^1\text{H}$  NMR (400 MHz, Chloroform- $d$ )  $\delta$  8.02–7.93 (m, 2H), 7.79–7.71 (m, 3H), 7.51–7.46 (m, 1H), 7.19–7.13 (m, 2H), 7.11–7.01 (m, 2H), 4.19–4.07 (m, 3H), 3.92 (s, 3H), 2.57 (s, 2H), 2.26 (s, 6H), 1.70 (d,  $J = 7.0$  Hz, 3H), 1.27 (t,  $J = 7.0$  Hz, 3H).  $^{13}\text{C}$  NMR (100 MHz, Chloroform- $d$ )  $\delta$  195.79, 172.64, 170.96, 157.80, 154.32, 134.70, 133.95, 133.85, 130.44, 129.28, 128.94, 127.46, 126.15, 125.95, 121.49, 119.20, 105.57, 60.42, 55.31, 54.19, 45.58, 44.58, 37.09, 36.66, 18.40, 14.30. HRMS (ESI)  $m/z$ : calcd for  $\text{C}_{30}\text{H}_{31}\text{O}_6$   $[\text{M}+\text{H}]^+$  487.2115, found: 487.2133.

**4-(3-(2-ethoxy-2-oxoethyl)bicyclo[1.1.1]pentane-1-carbonyl)phenyl (S)-2-(4-isobutylphenyl)propanoate (4aq)**

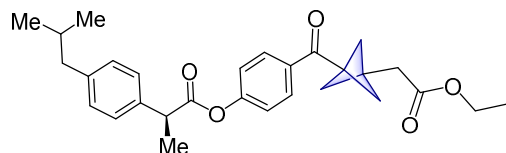

With DMSO as the solvent, product **4aq** was isolated as a yellow oil (38.4 mg, 42%).  $^1\text{H}$  NMR (400 MHz, Chloroform- $d$ )  $\delta$  8.02–7.94 (m, 2H), 7.31–7.26 (m, 2H), 7.17–7.12 (m, 2H), 7.09–7.04 (m, 2H), 4.16 (q,  $J = 7.2$  Hz, 2H), 3.95 (q,  $J = 7.2$  Hz, 1H), 2.57 (s, 2H), 2.47 (dd,  $J = 7.2, 2.4$  Hz, 2H), 2.27 (s, 6H), 1.91–1.82 (m, 1H), 1.61 (dd,  $J = 7.2, 2.6$  Hz, 3H), 1.27 (t,  $J = 5.8$  Hz, 3H), 0.91 (dd,  $J = 6.8, 2.6$  Hz, 6H).  $^{13}\text{C}$  NMR (100 MHz, Chloroform- $d$ )  $\delta$  195.81, 172.68, 170.96, 154.36, 140.98, 136.81, 133.91, 130.43, 129.56, 127.15, 121.49, 60.42, 54.19, 45.25, 45.00, 44.59, 37.09, 36.66, 30.15, 22.36, 18.40, 14.30. HRMS (ESI)  $m/z$ : calcd for  $\text{C}_{29}\text{H}_{35}\text{O}_5$   $[\text{M}+\text{H}]^+$  463.2479, found: 463.2482.

## 7. Reference

- [1] X. Liu, X. Tian, J. Huang, Y. Qian, X. Xu, Z. Kang, W. Hu, *Org. Lett.* **2022**, *24*, 1027-1032.
- [2] A. Shi, K. Sun, X. Chen, L. Qu, Y. Zhao, B. Yu, *Org. Lett.* **2022**, *24*, 299-303.
- [3] X. Wang, Y. Sun, X.-Q. Yao, Y. Xu, J. Wang, *Macromolecules* **2022**, *55*, 8866-8874.
- [4] H. Guo, S. Zhang, X. Yu, X. Feng, Y. Yamamoto, M. Bao, *ACS Catal.* **2021**, *11*, 10789-10795.
- [5] B. Muriel, J. Waser, *Angew. Chem. Int. Ed.* **2021**, *60*, 4075-4079.
- [6] I. Piel, M. D. Pawelczyk, K. Hirano, R. Fröhlich, F. Glorius, *Eur. J. Org. Chem.* **2011**, *2011*, 5475-5484.
- [7] S. C. Gadekar, V. Dhayalan, A. Nandi, I. L. Zak, M. S. Mizrachi, S. Kozuch, A. Milo, *ACS Catal.* **2021**, *11*, 14561-14569.

## 8. Copies of $^1\text{H}$ , $^{19}\text{F}$ , and $^{13}\text{C}$ NMR spectra of all products.

### Ethyl 2-(3-(4-chlorobenzoyl)bicyclo[1.1.1]pentan-1-yl)acetate (**4a**)

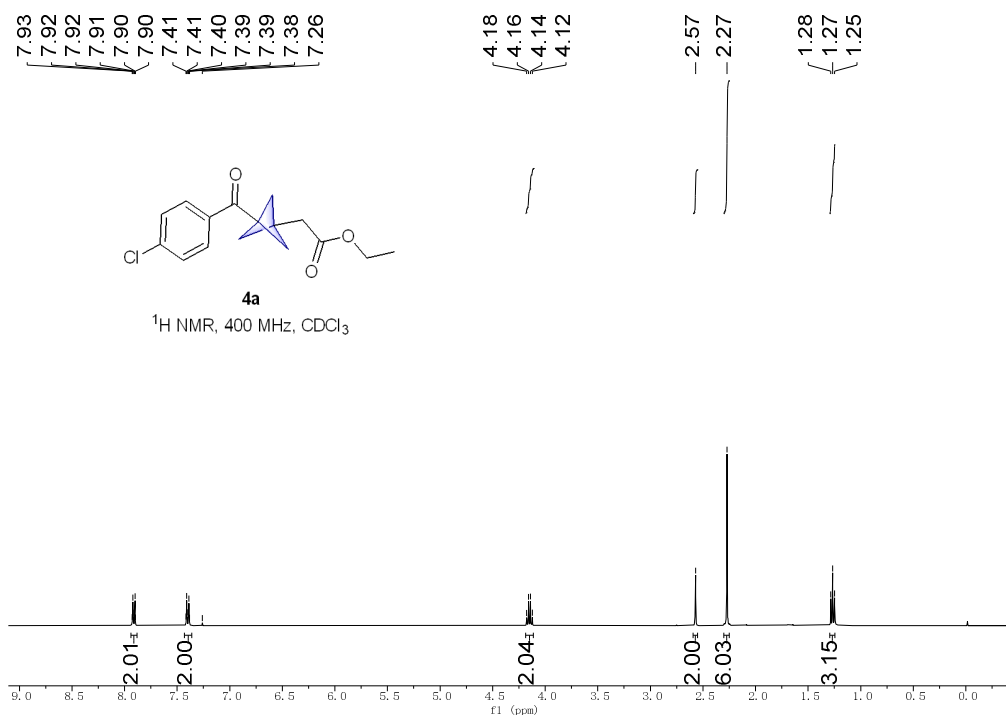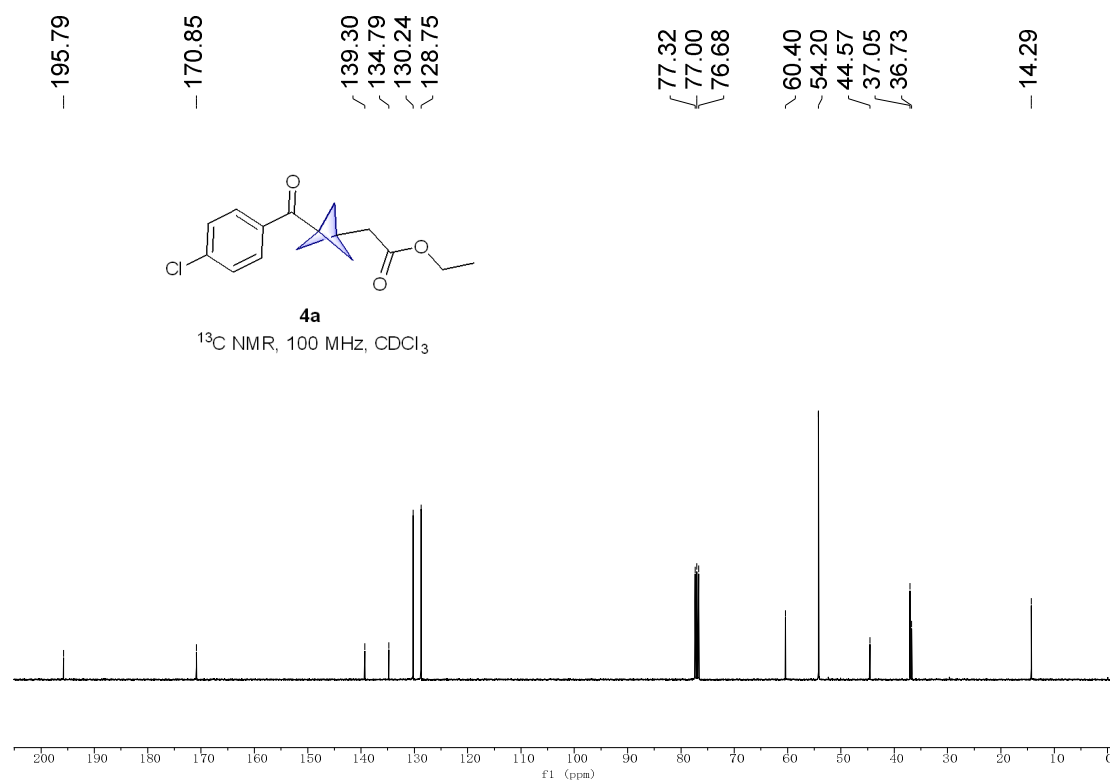

### Ethyl 2-(3-(4-methylbenzoyl)bicyclo[1.1.1]pentan-1-yl)acetate (4b)

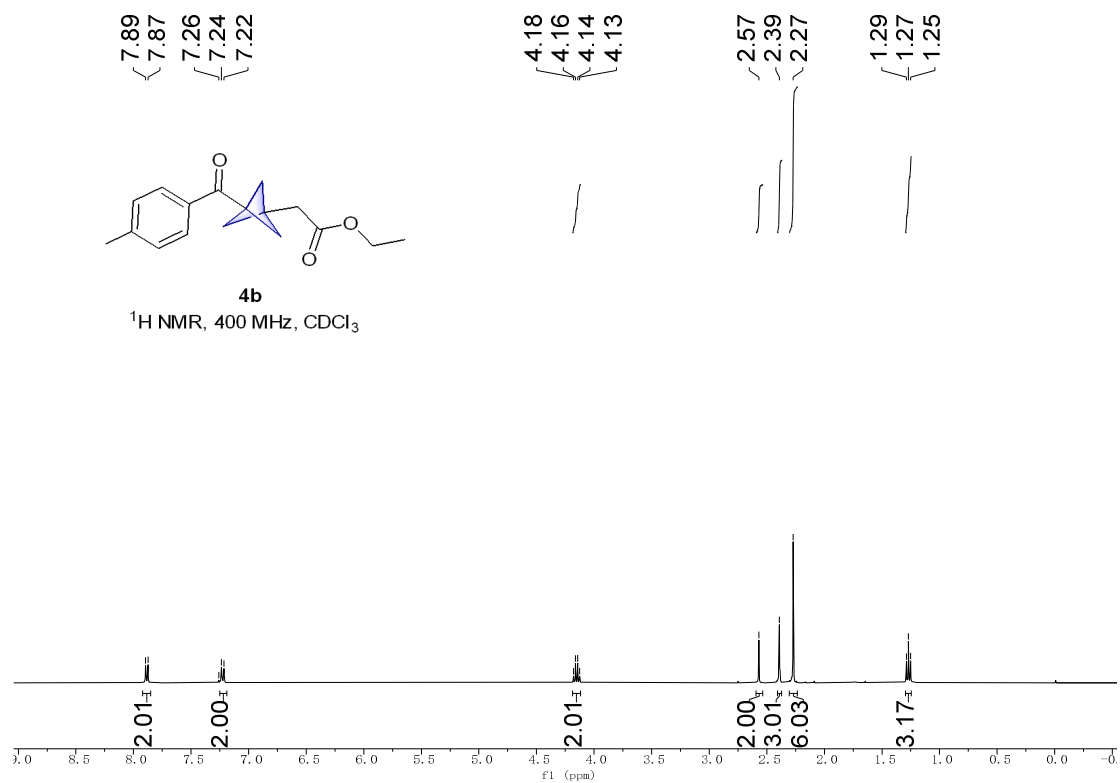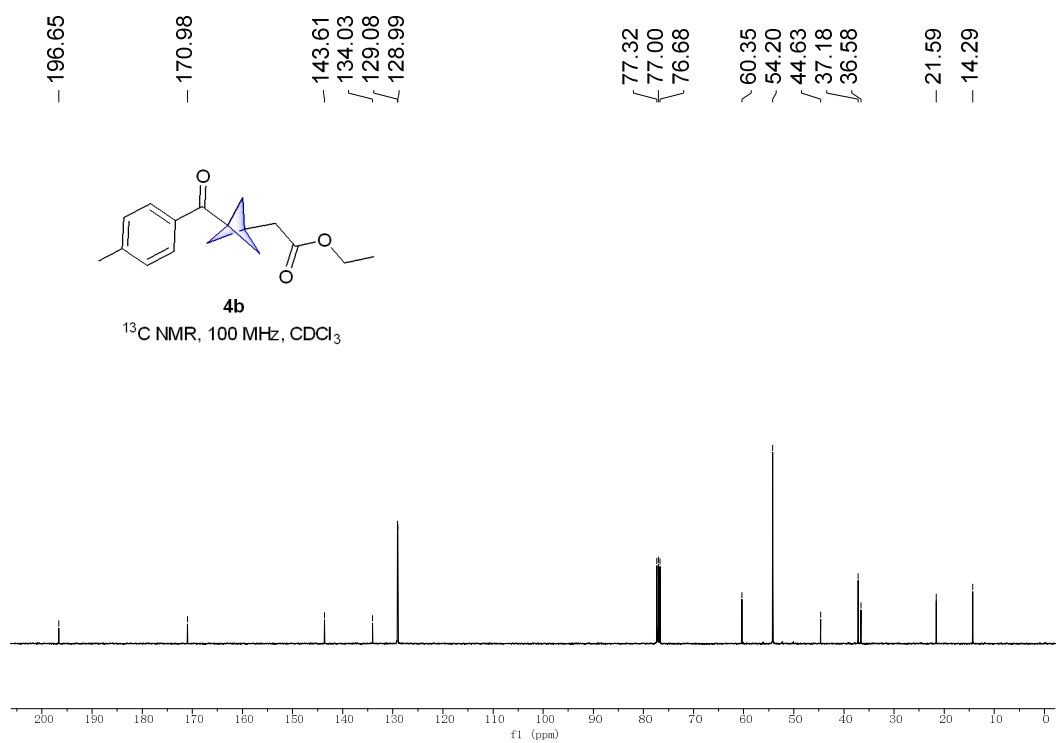

### Ethyl 2-(3-(4-fluorobenzoyl)bicyclo[1.1.1]pentan-1-yl)acetate (4c)

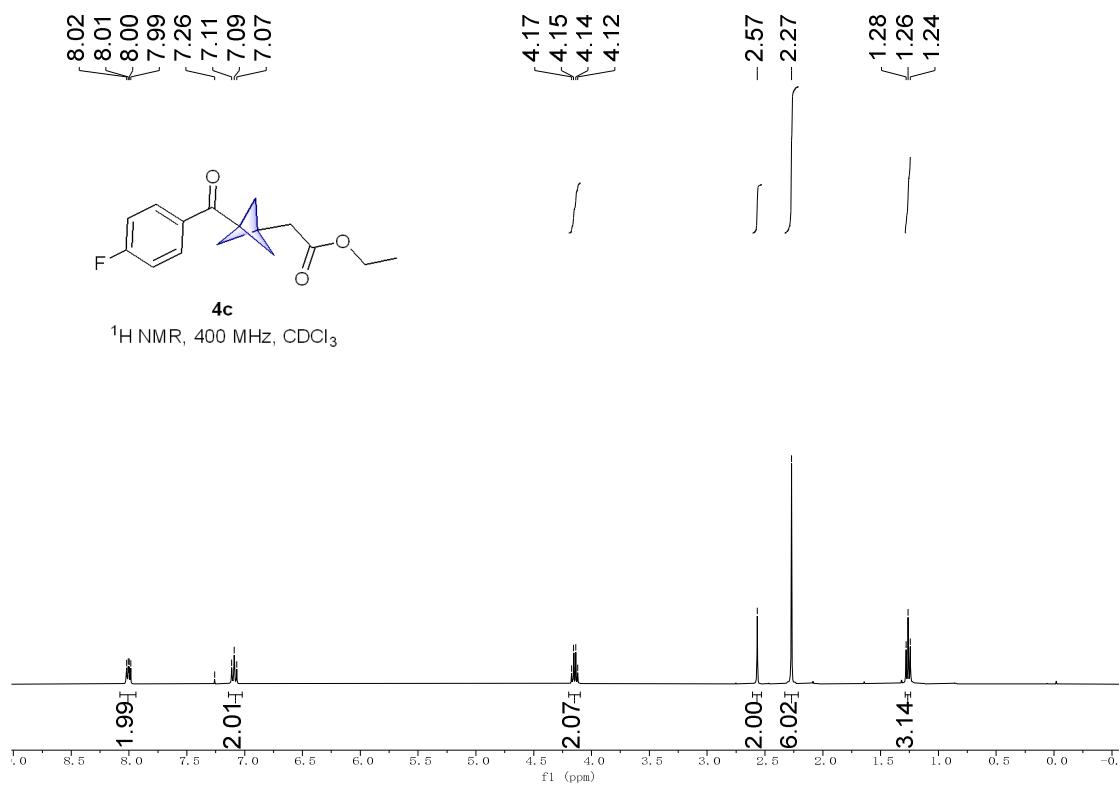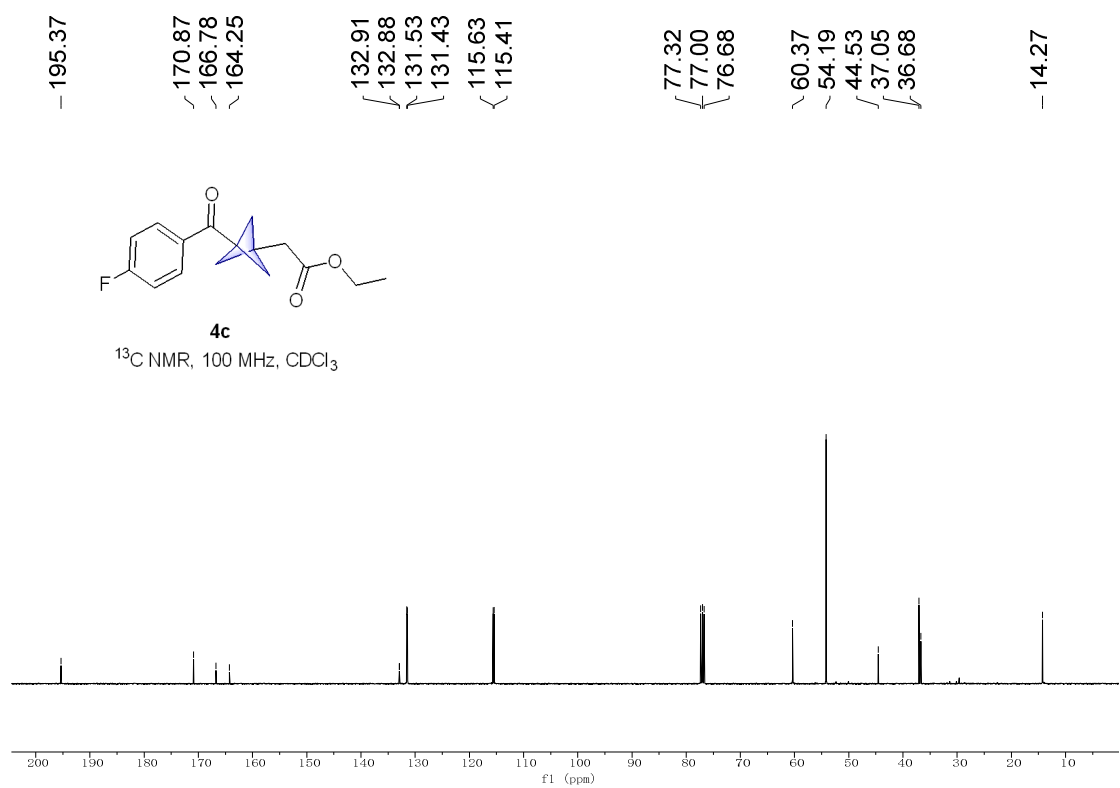

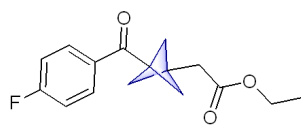

**4c**

$^{19}\text{F}$  NMR, 376 MHz,  $\text{CDCl}_3$

--105.20

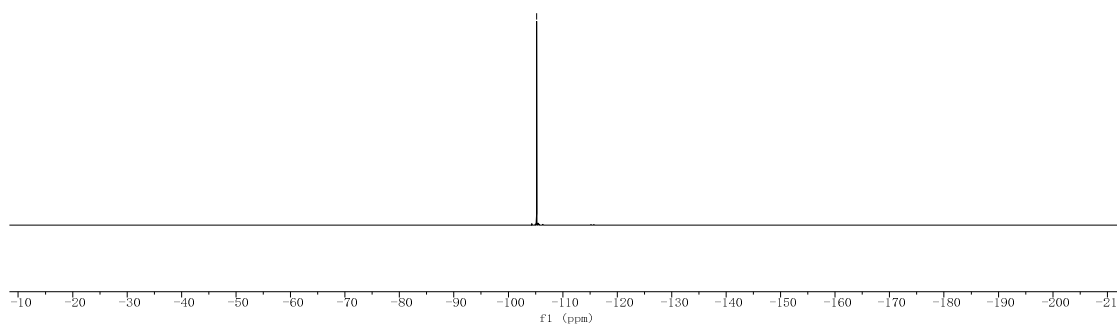

**Ethyl 2-(3-benzoylbicyclo[1.1.1]pentan-1-yl)acetate (4d)**

7.98  
7.97  
7.96  
7.55  
7.55  
7.54  
7.53  
7.53  
7.52  
7.51  
7.51  
7.45  
7.43  
7.41  
7.26

4.18  
4.16  
4.15  
4.13

2.57  
2.29

1.29  
1.27  
1.25

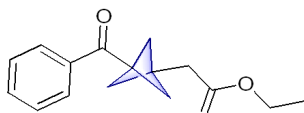

**4d**

$^1\text{H}$  NMR, 400 MHz,  $\text{CDCl}_3$

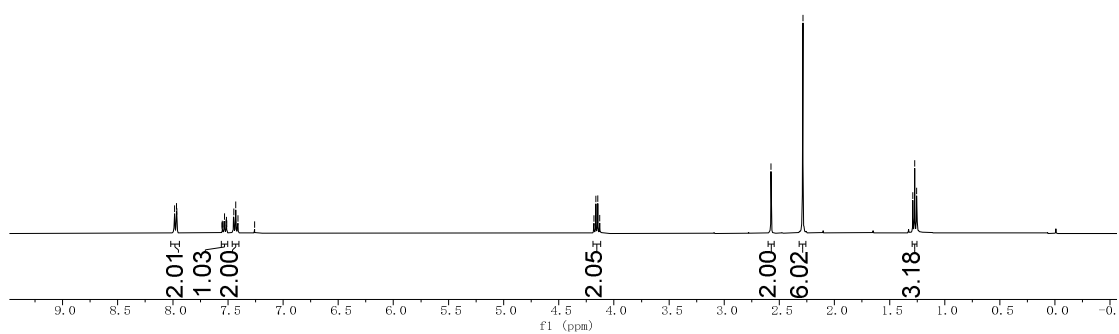

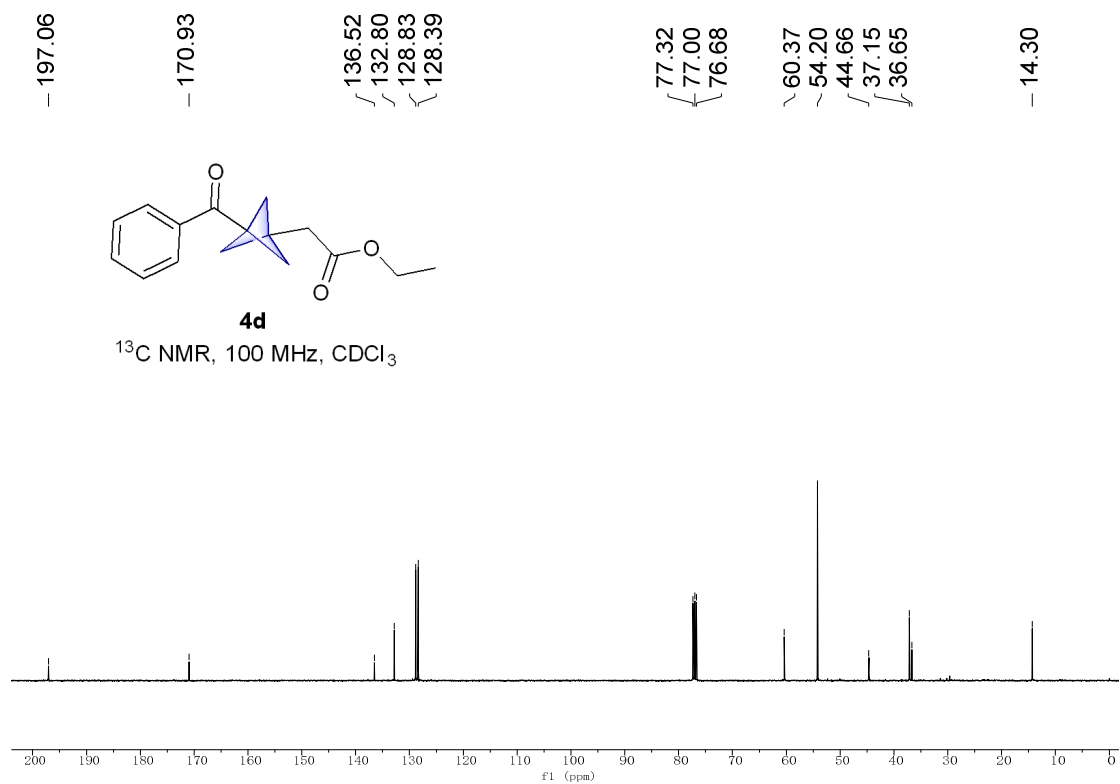

**Ethyl 2-(3-(4-cyanobenzoyl)bicyclo[1.1.1]pentan-1-yl)acetate (4e)**

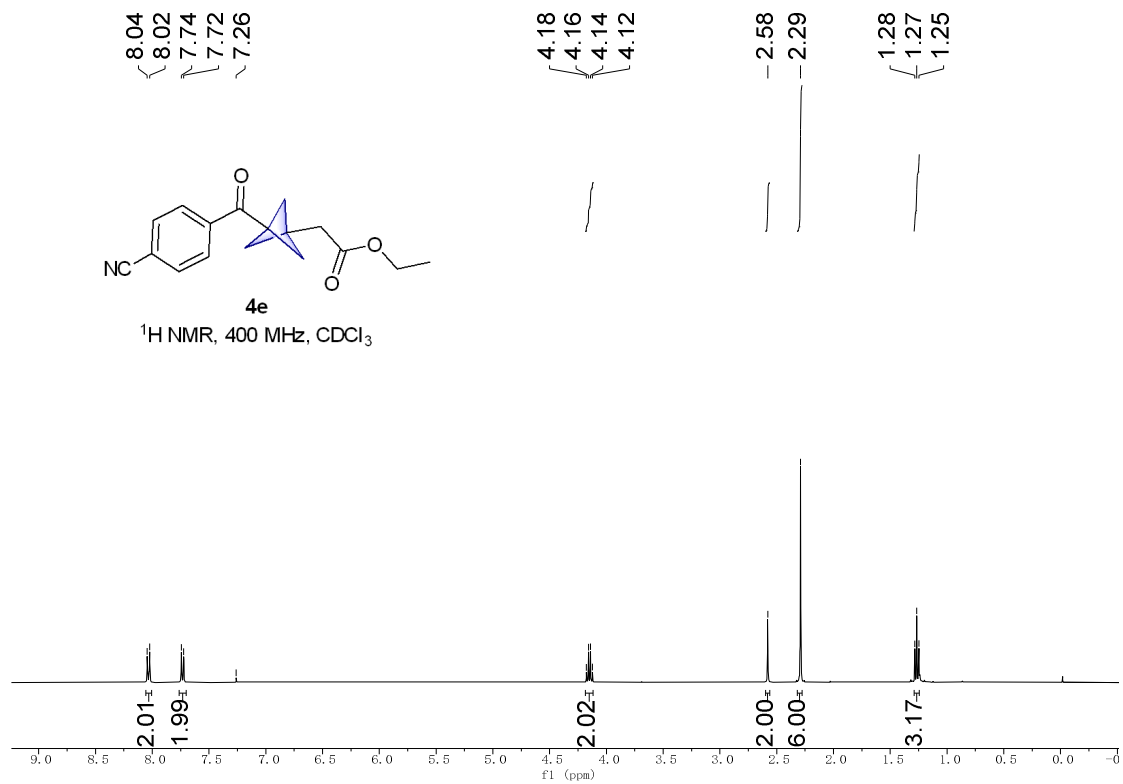



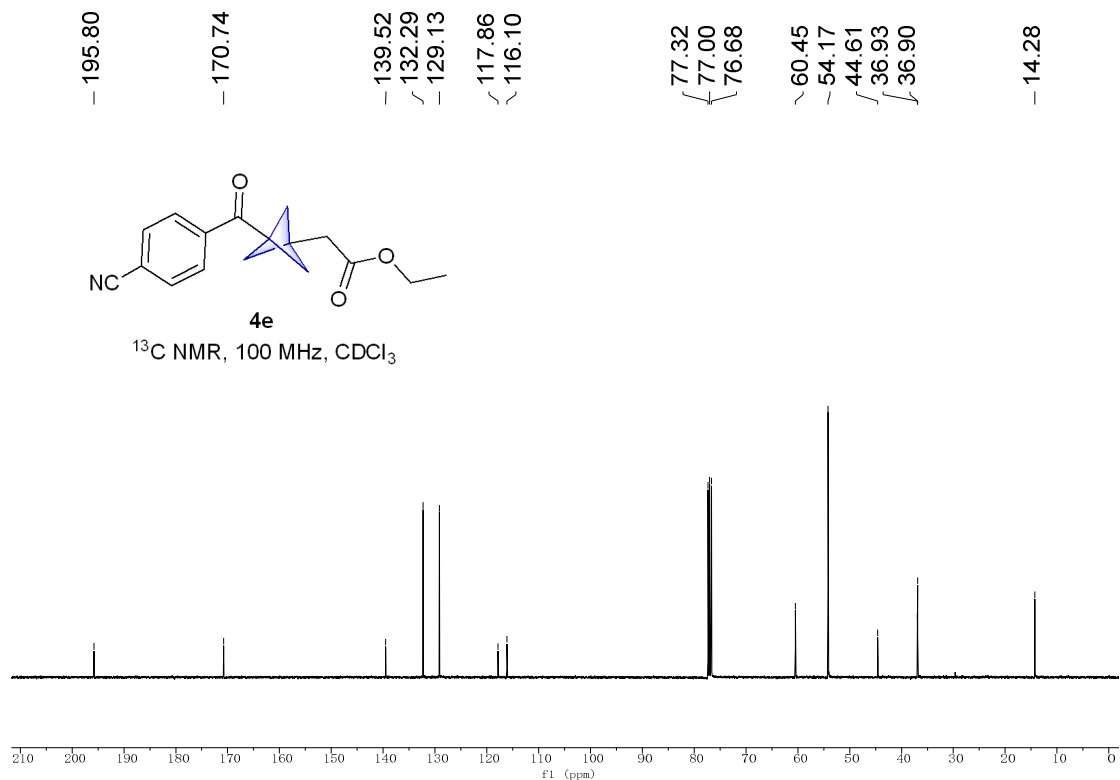

**Ethyl 2-(3-(1,1'-biphenyl)-4-carbonyl)bicyclo[1.1.1]pentan-1-yl)acetate (4f)**

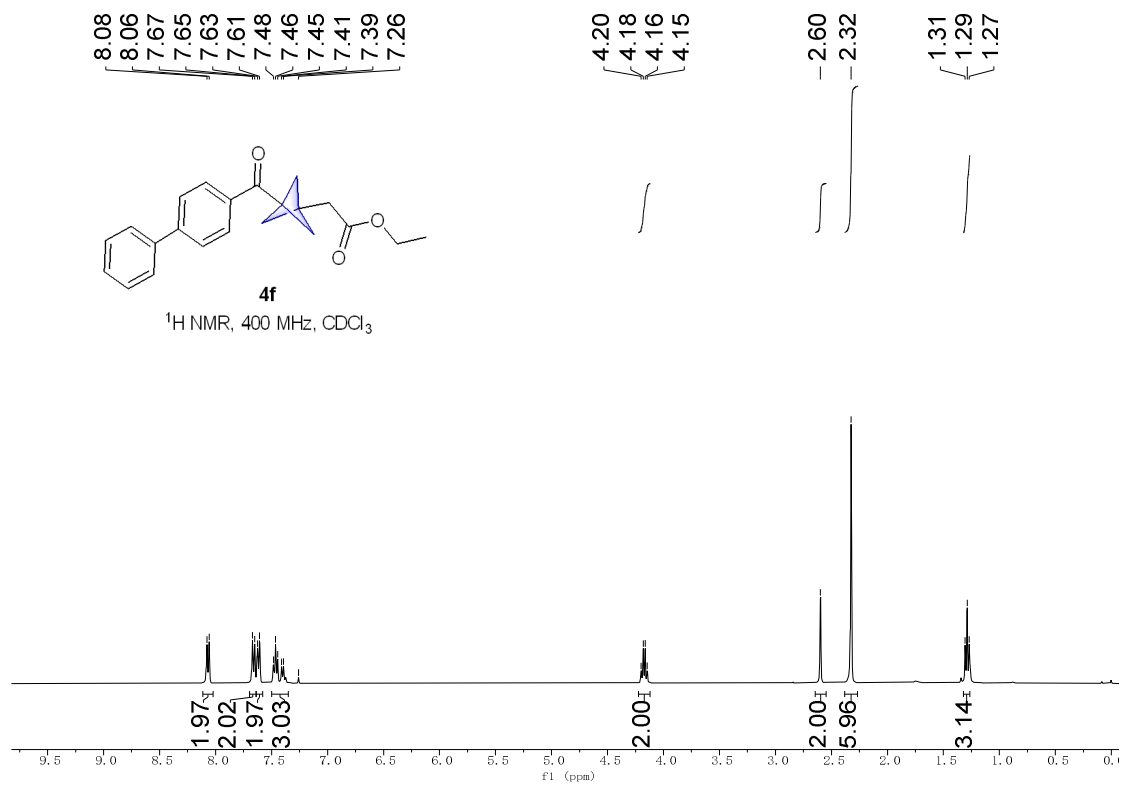

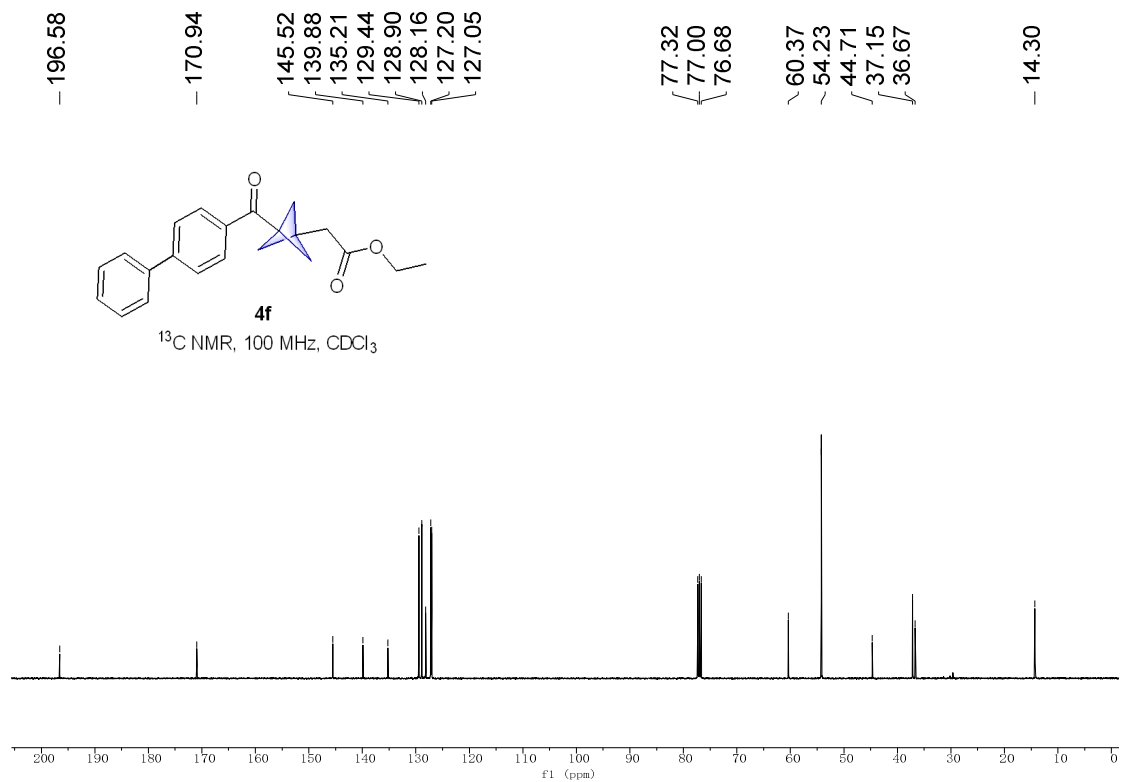

**Ethyl 2-(3-(4-(methylthio)benzoyl)bicyclo[1.1.1]pentan-1-yl)acetate (4g)**

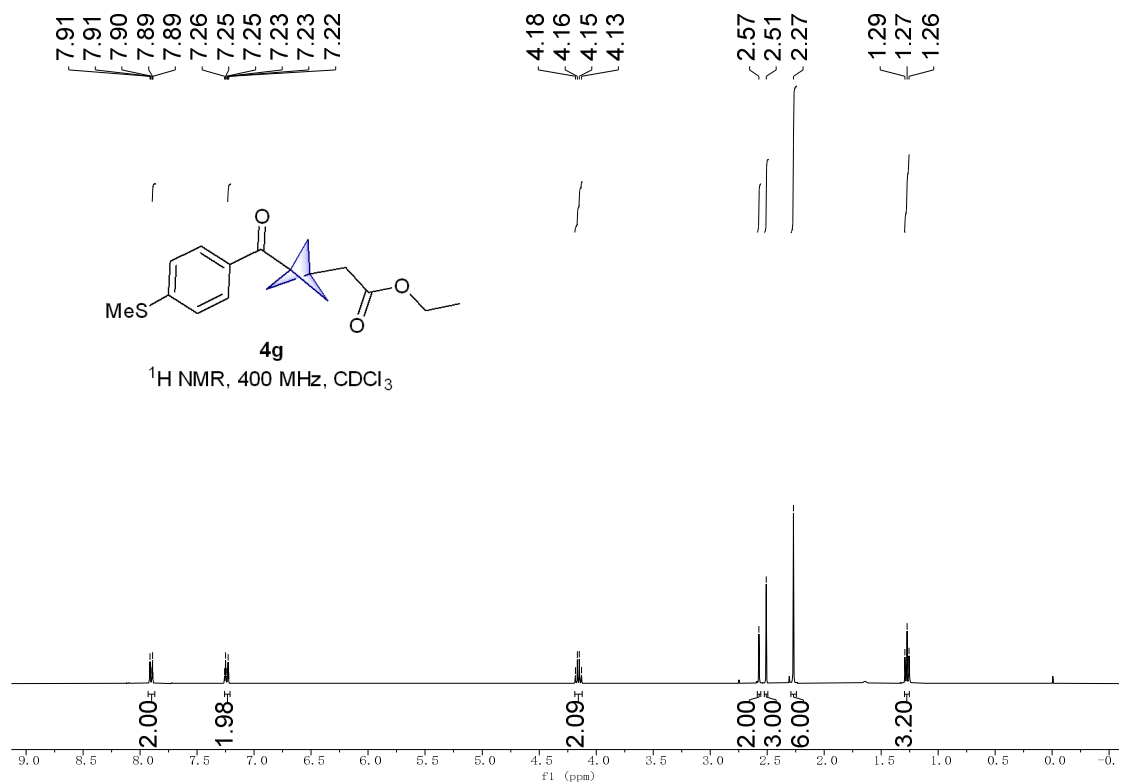

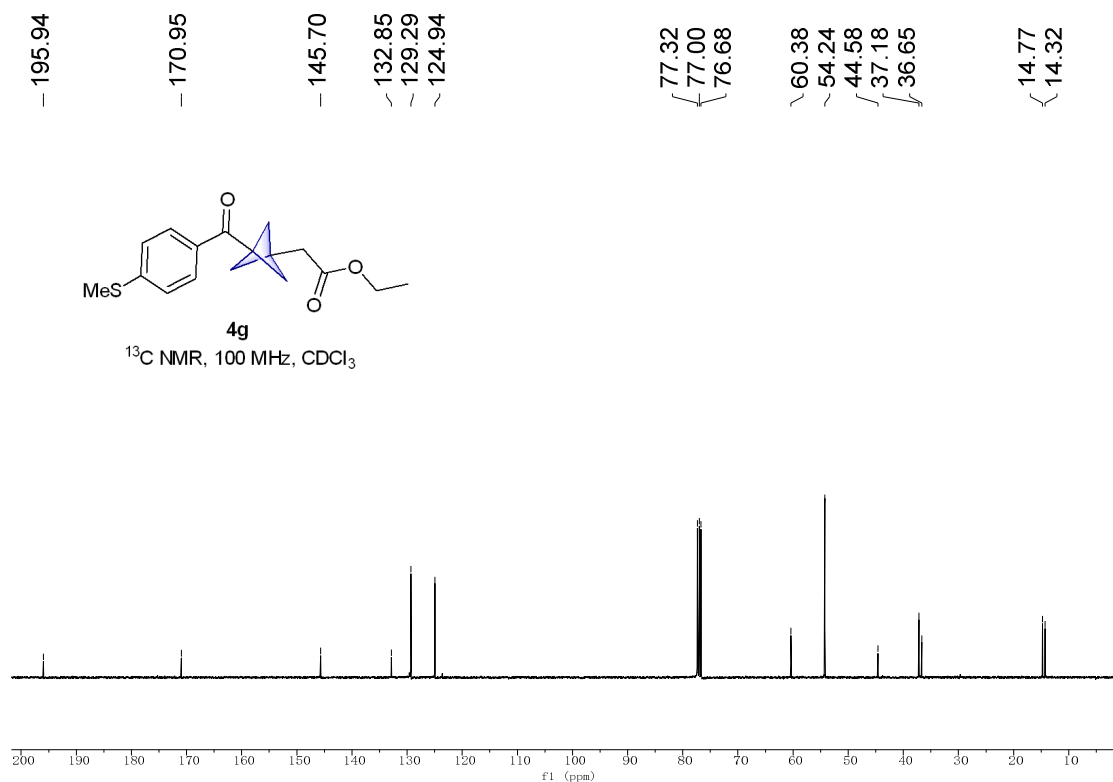

**Ethyl 2-(3-(4-(trifluoromethoxy)benzoyl)bicyclo[1.1.1]pentan-1-yl)acetate (4h)**

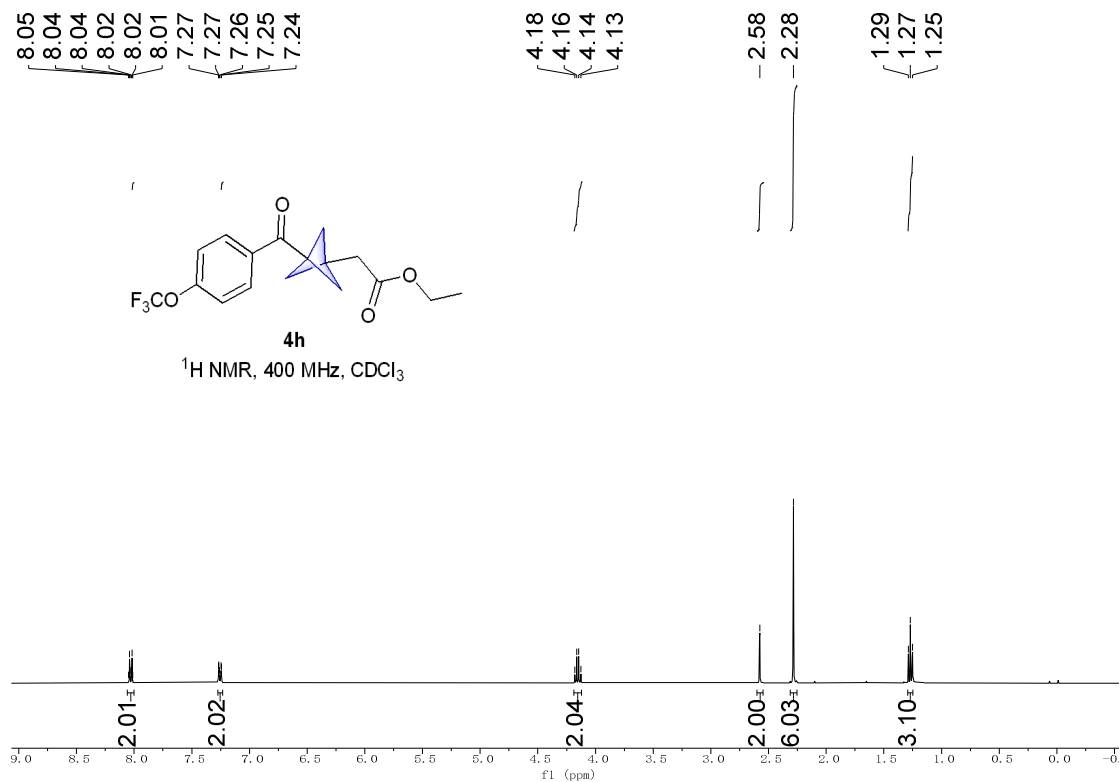

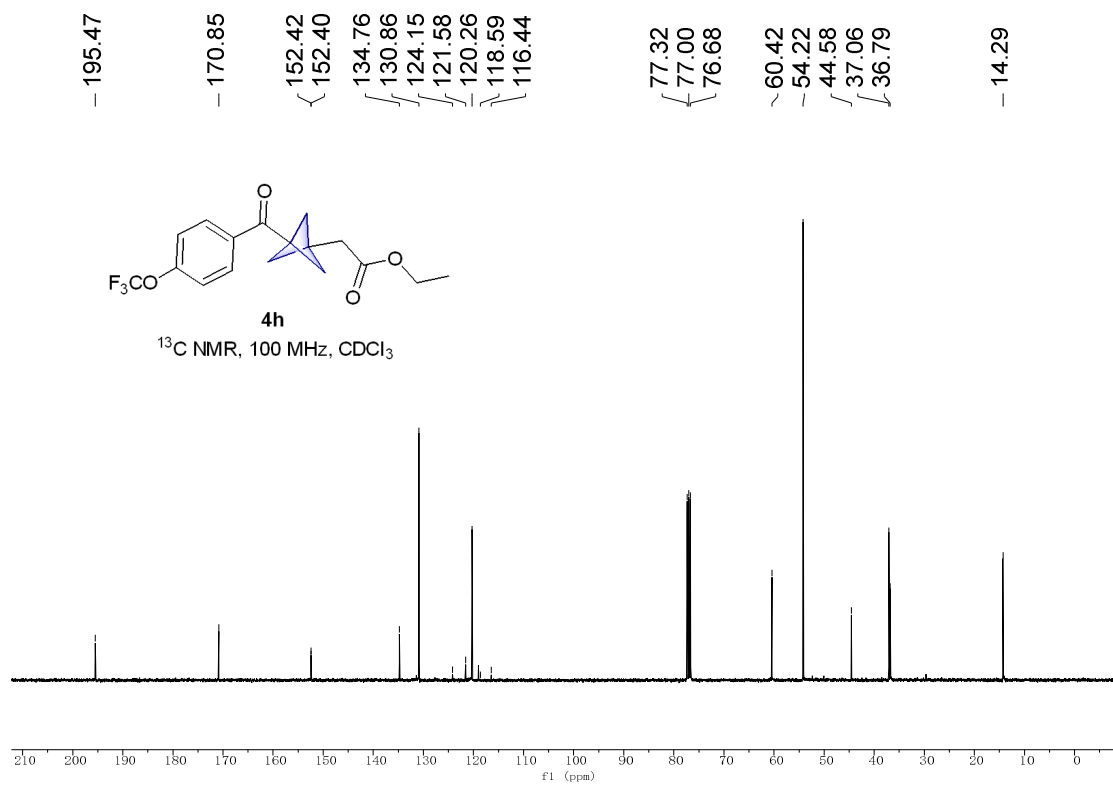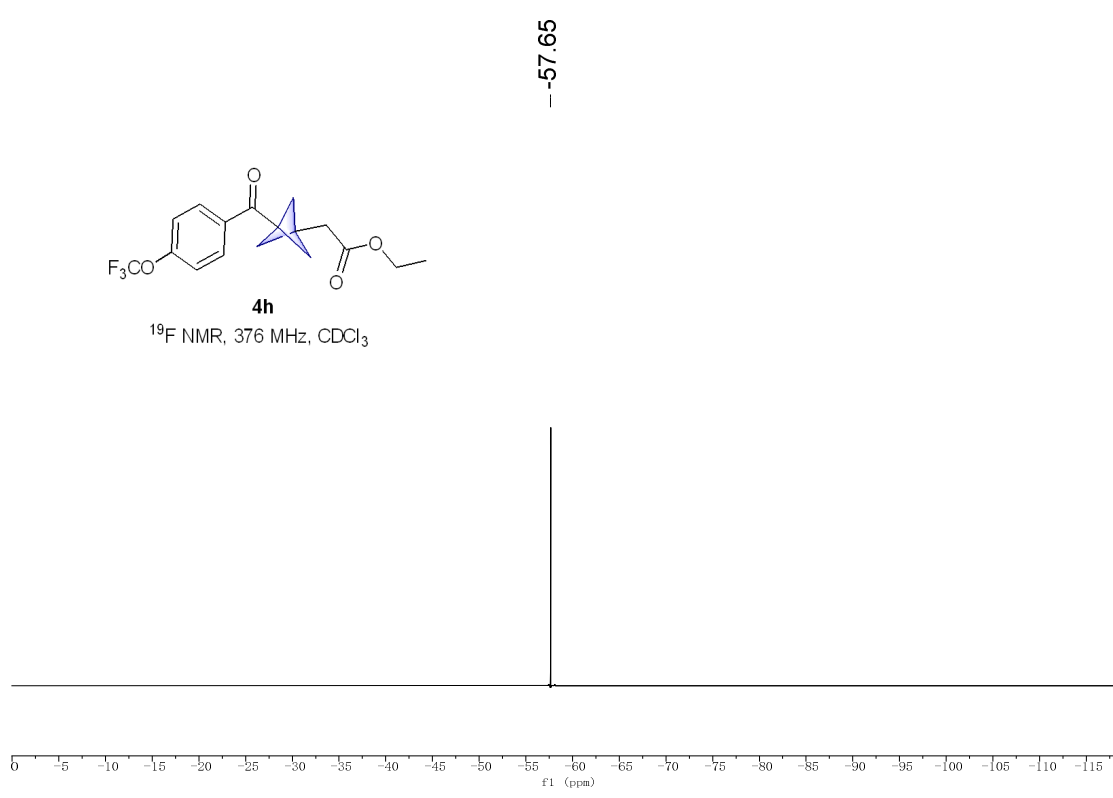

**Ethyl 2-(3-(4-(benzyloxy)benzoyl)bicyclo[1.1.1]pentan-1-yl)acetate (4i)**

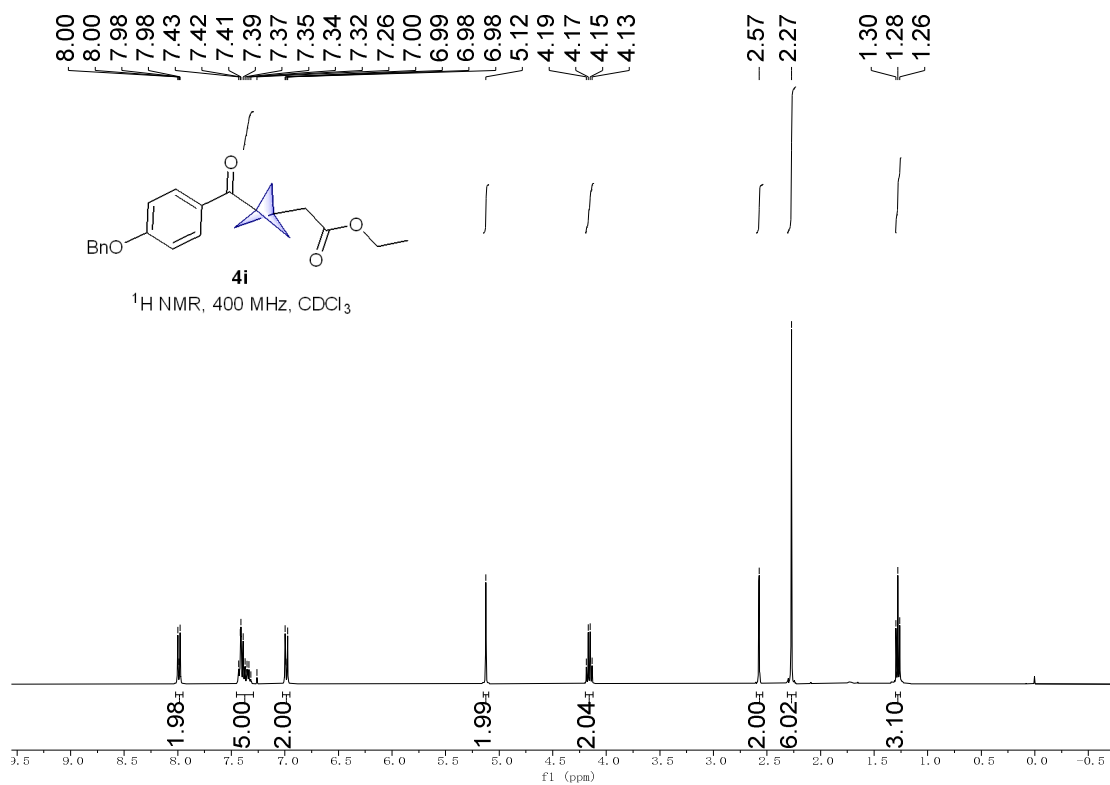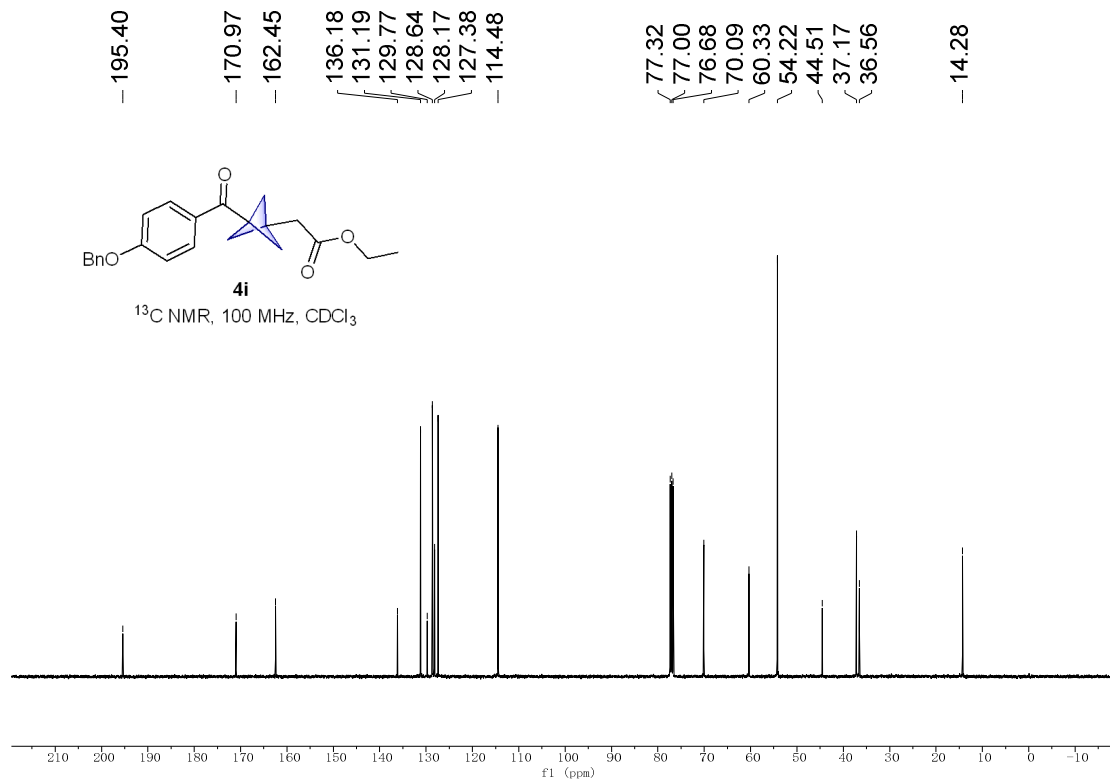

**Ethyl 2-(3-(4-acetylbenzoyl)bicyclo[1.1.1]pentan-1-yl)acetate (4j)**

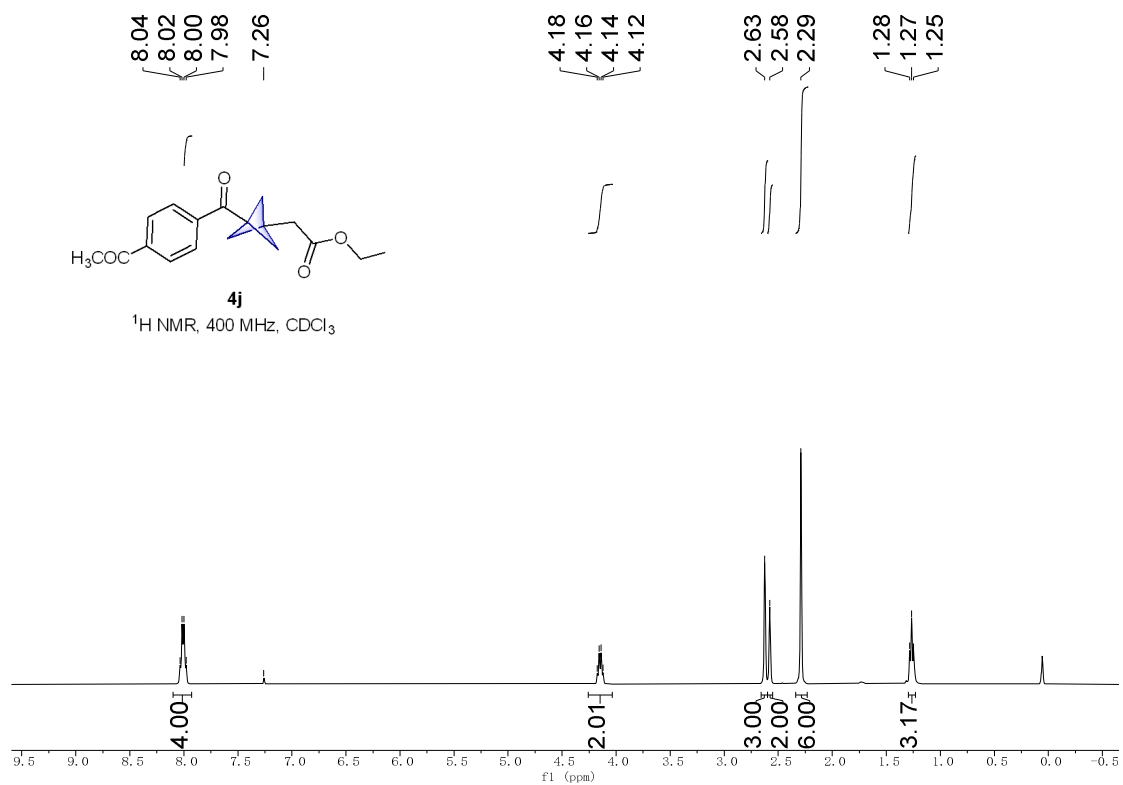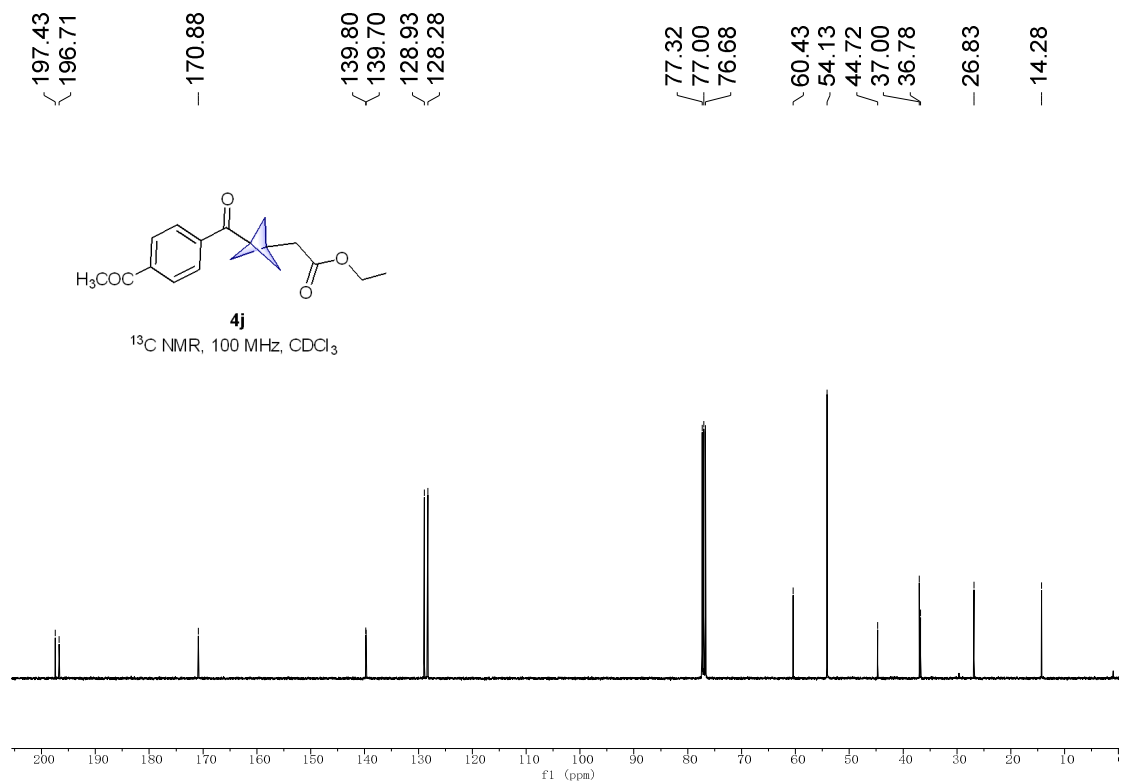

**Ethyl 2-(3-(3-bromobenzoyl)bicyclo[1.1.1]pentan-1-yl)acetate (4k)**

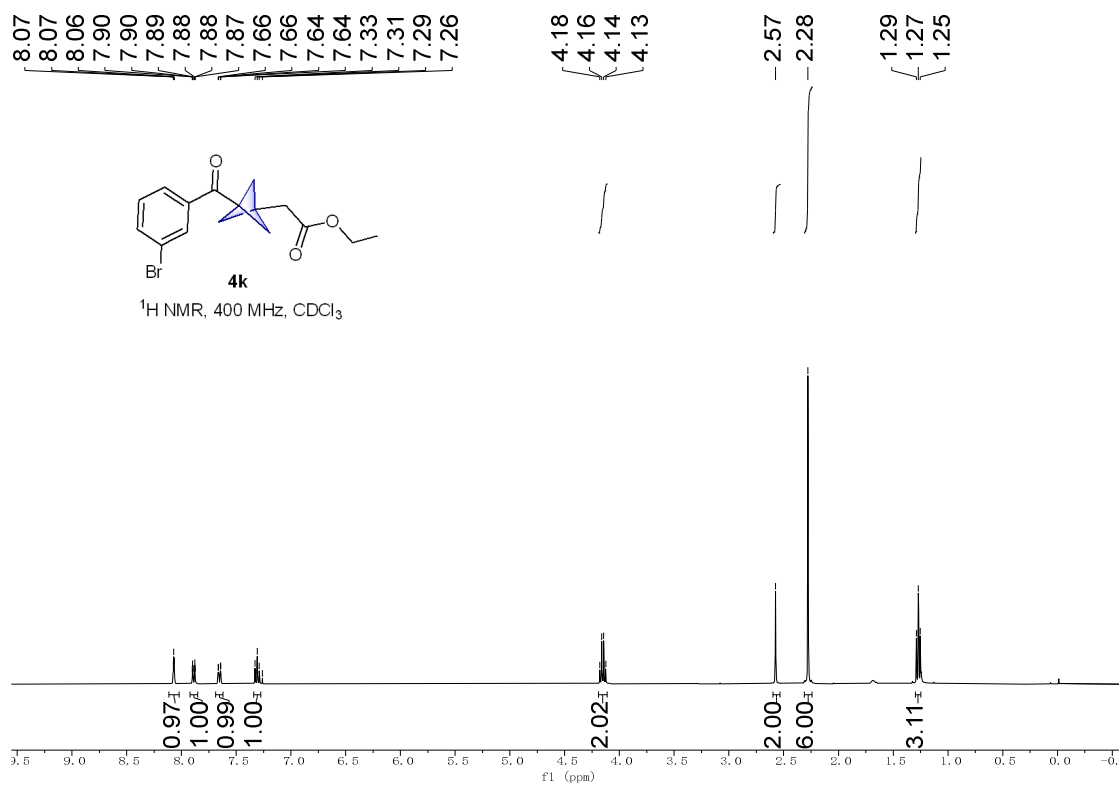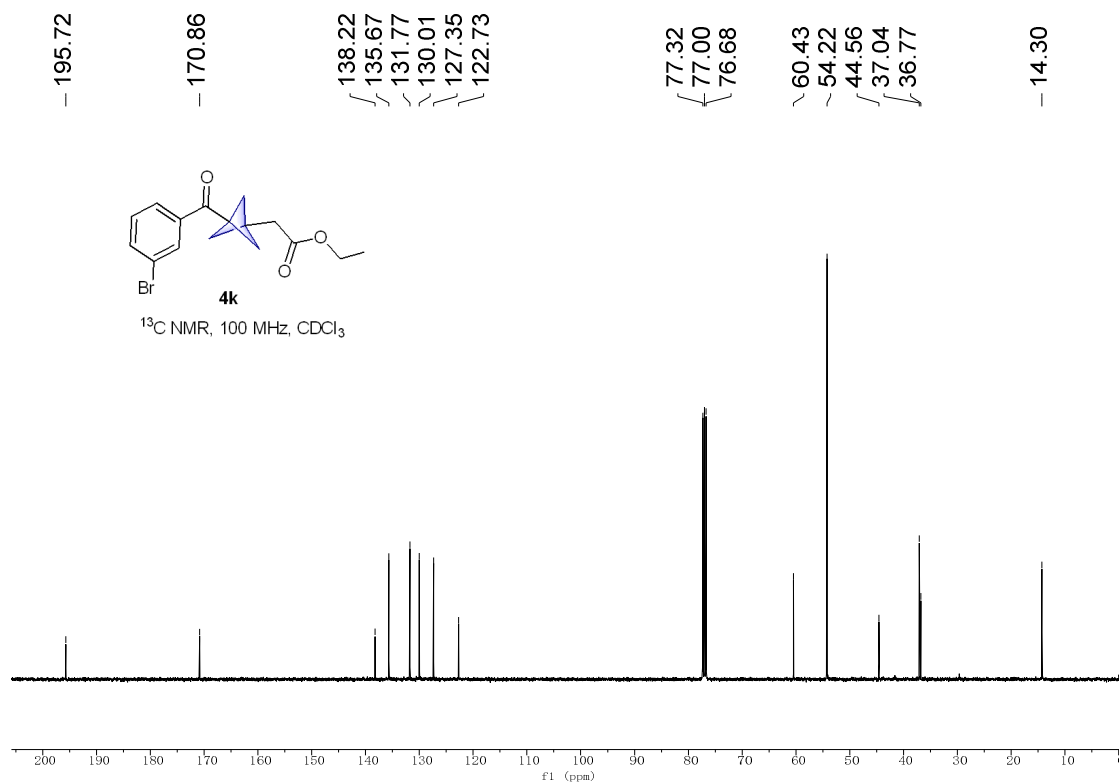

**Ethyl 2-(3-(3-methoxybenzoyl)bicyclo[1.1.1]pentan-1-yl)acetate (4I)**

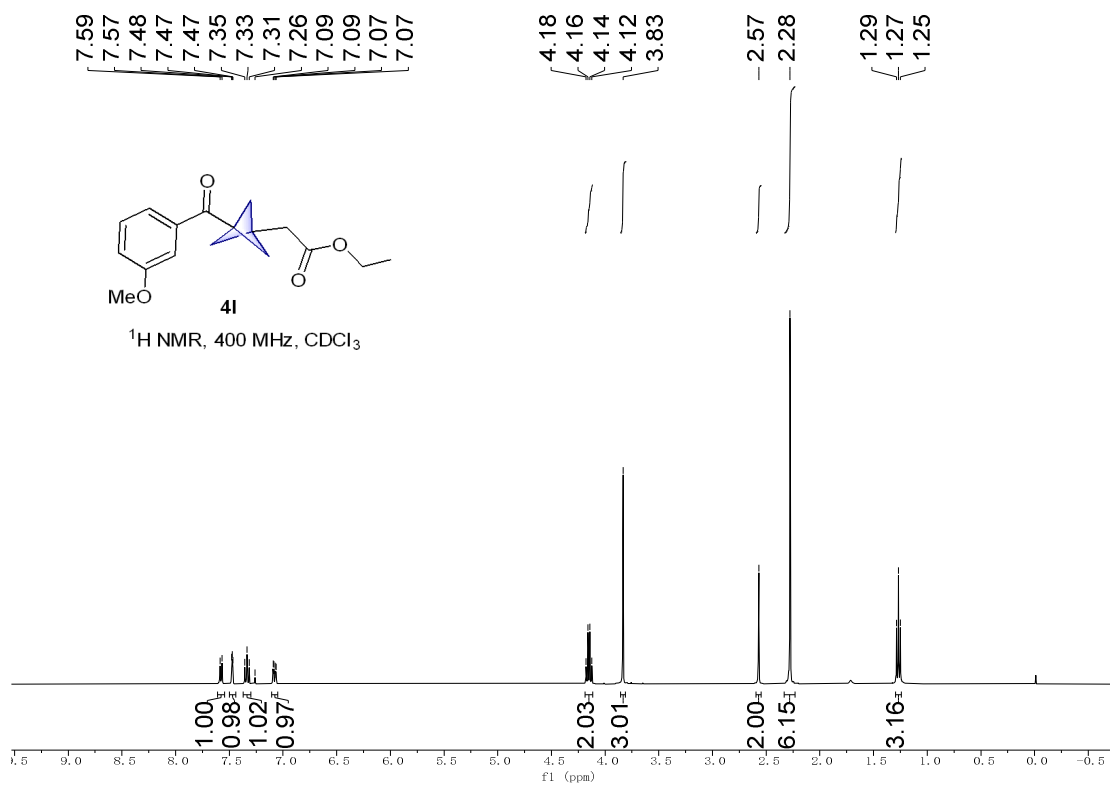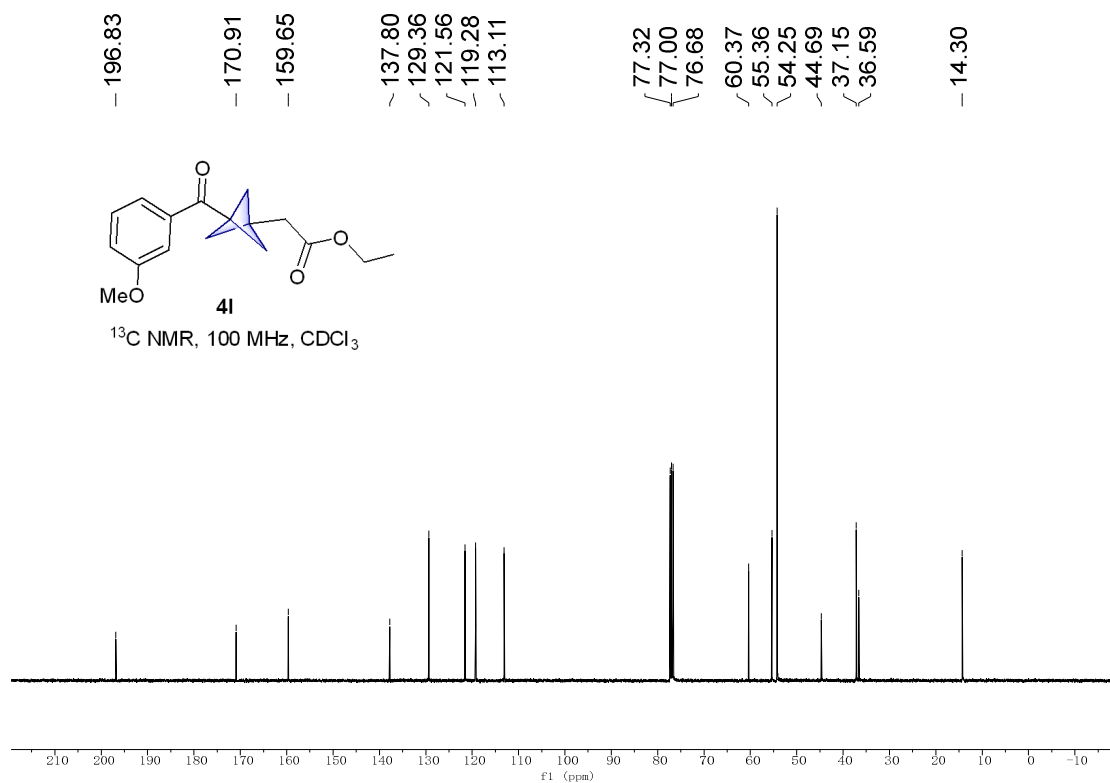



**Ethyl 2-(3-(2-fluorobenzoyl)bicyclo[1.1.1]pentan-1-yl)acetate (4m)**

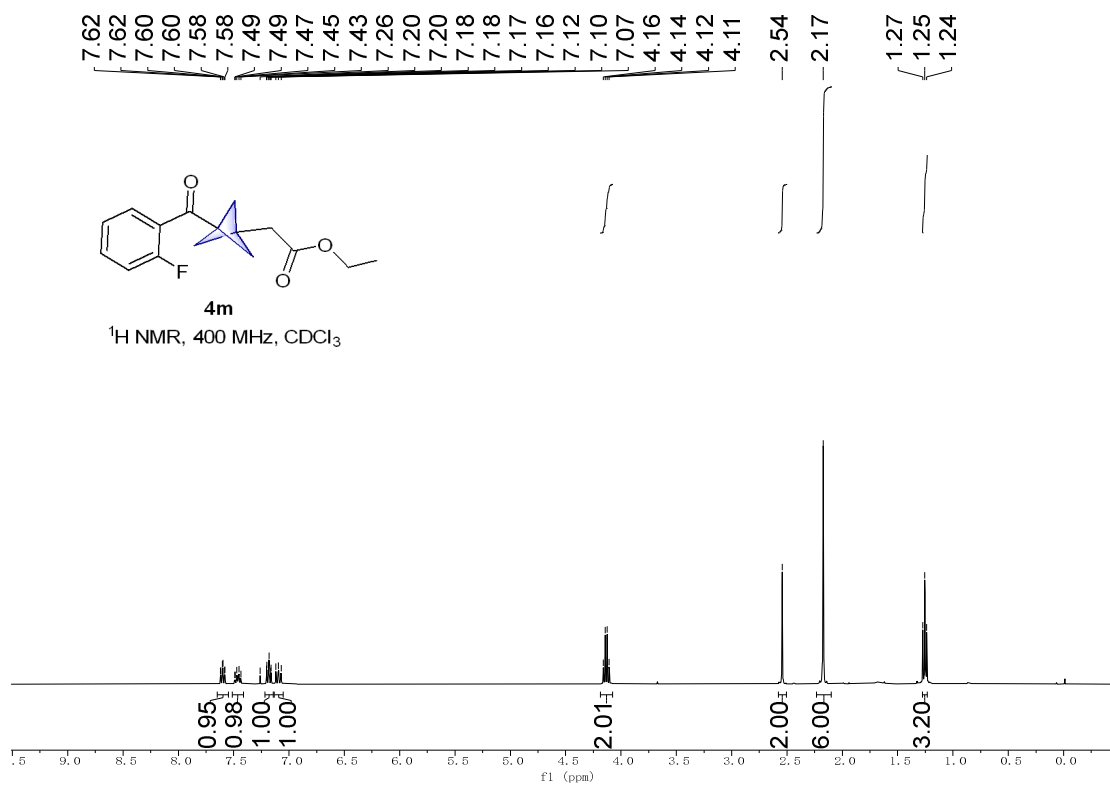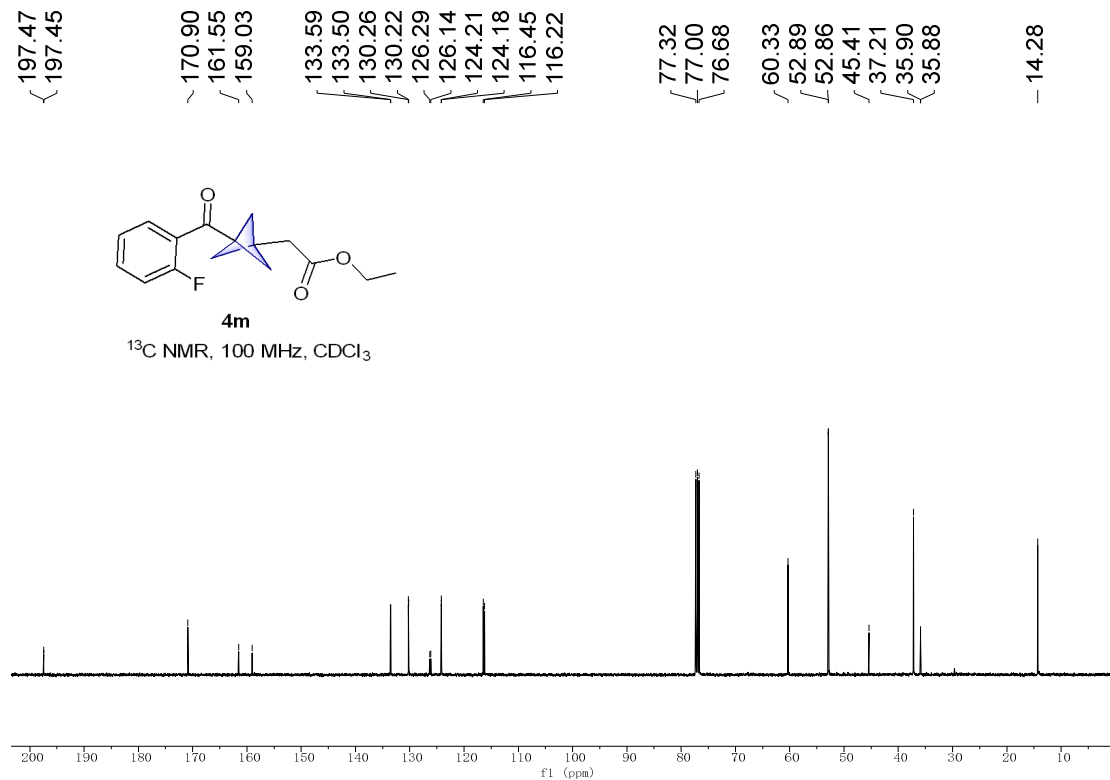

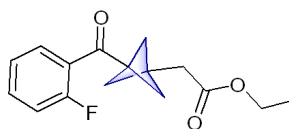

**4m**

$^{19}\text{F}$  NMR, 376 MHz,  $\text{CDCl}_3$

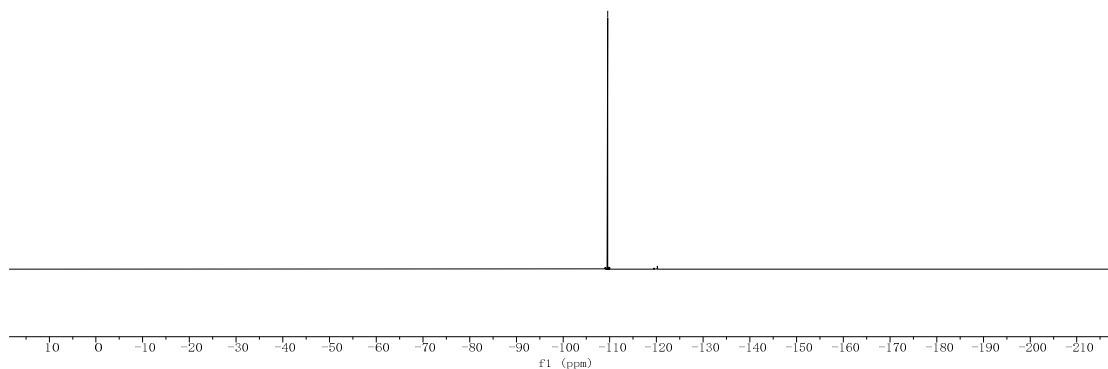

**Ethyl 2-(3-(3,5-difluorobenzoyl)bicyclo[1.1.1]pentan-1-yl)acetate (4n)**

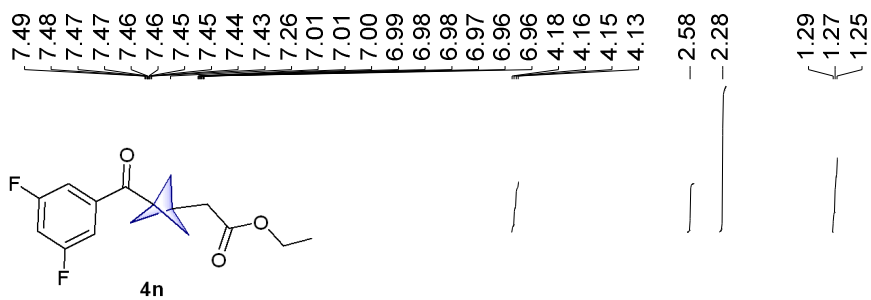

**4n**

$^1\text{H}$  NMR, 400 MHz,  $\text{CDCl}_3$

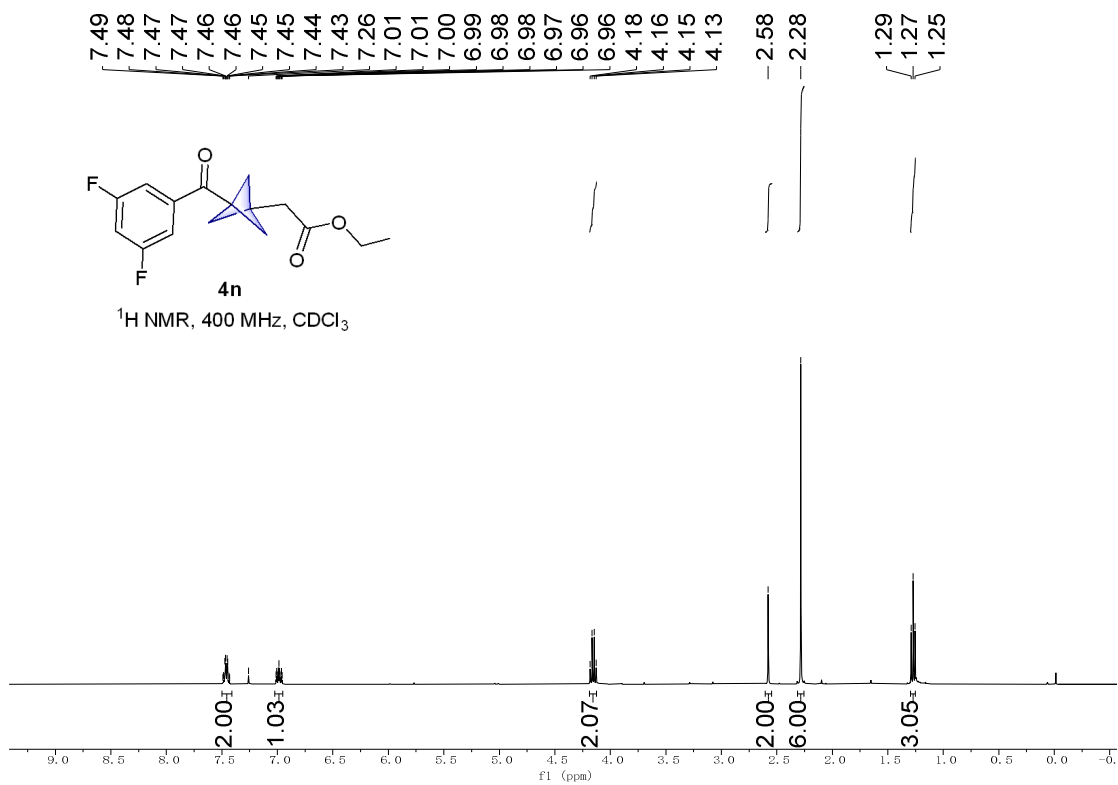

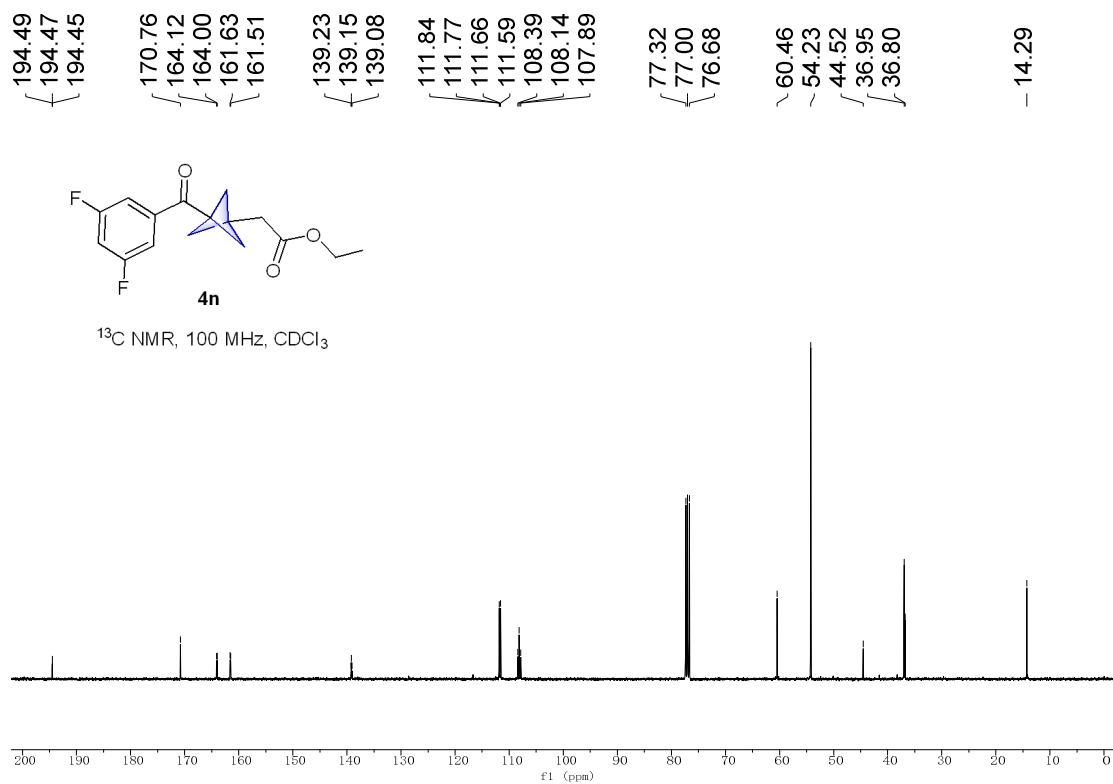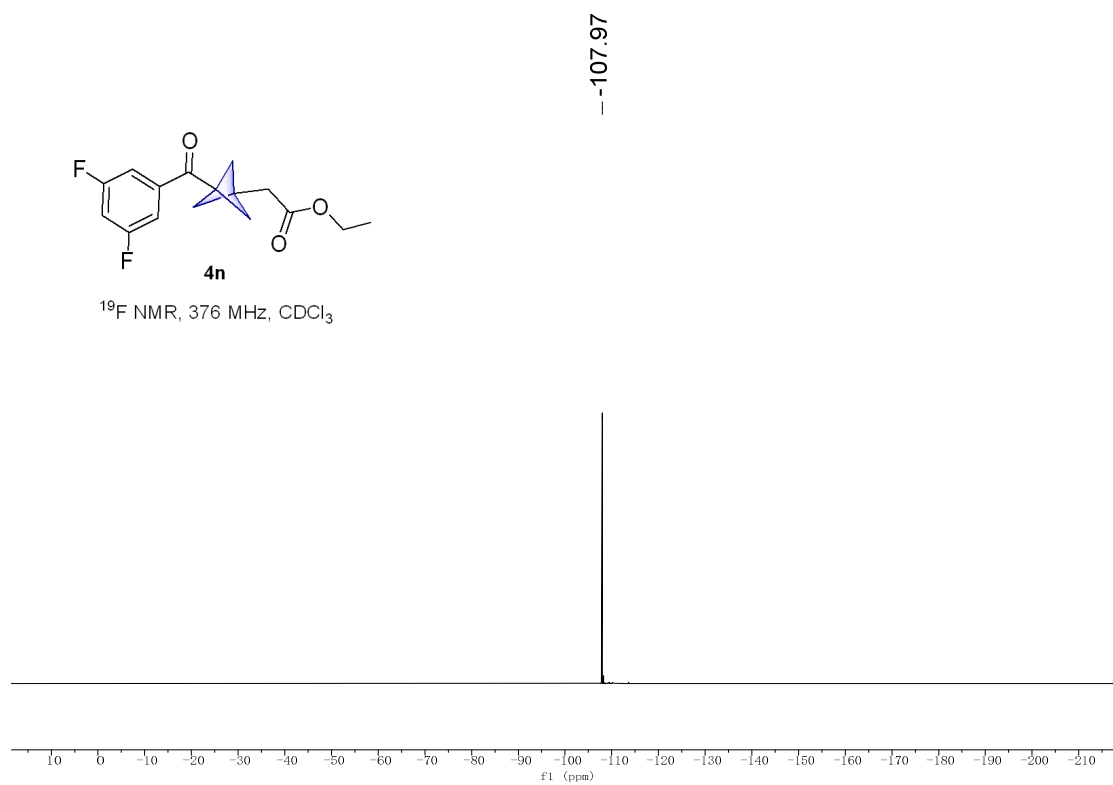

**Ethyl 2-(3-(3,5-dimethylbenzoyl)bicyclo[1.1.1]pentan-1-yl)acetate (4o)**

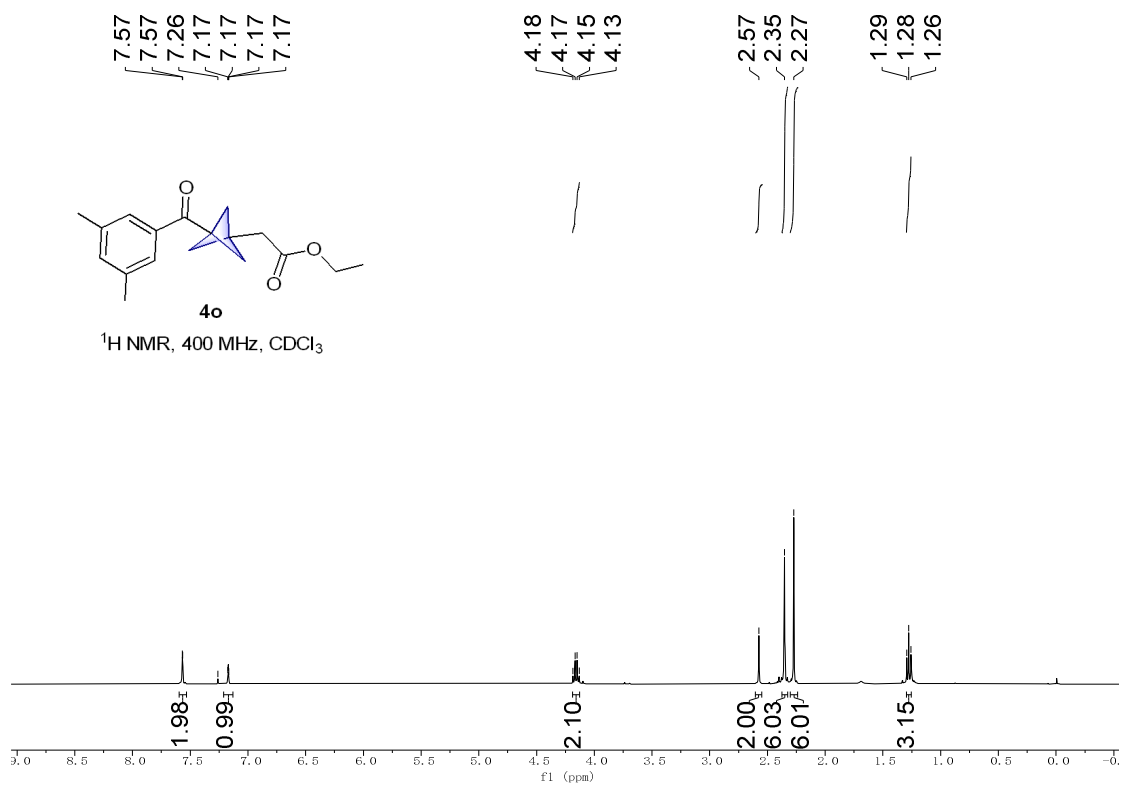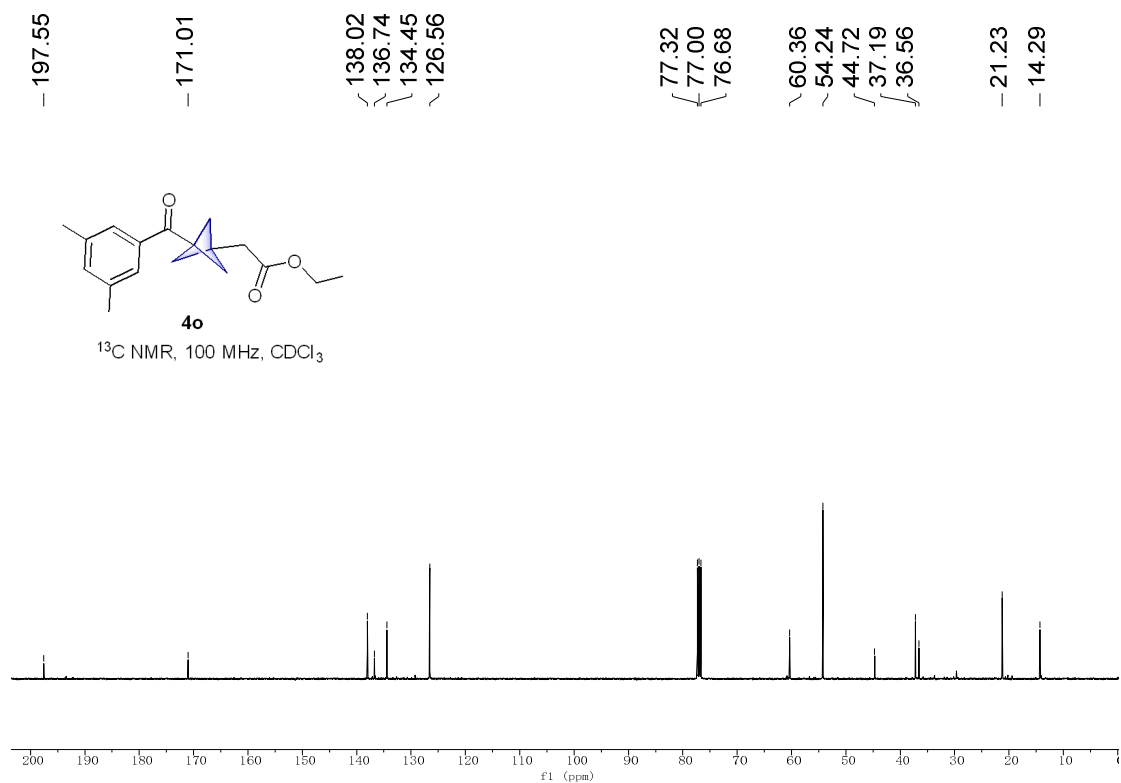

**Ethyl 2-(3-(quinoline-6-carbonyl)bicyclo[1.1.1]pentan-1-yl)acetate (4p)**

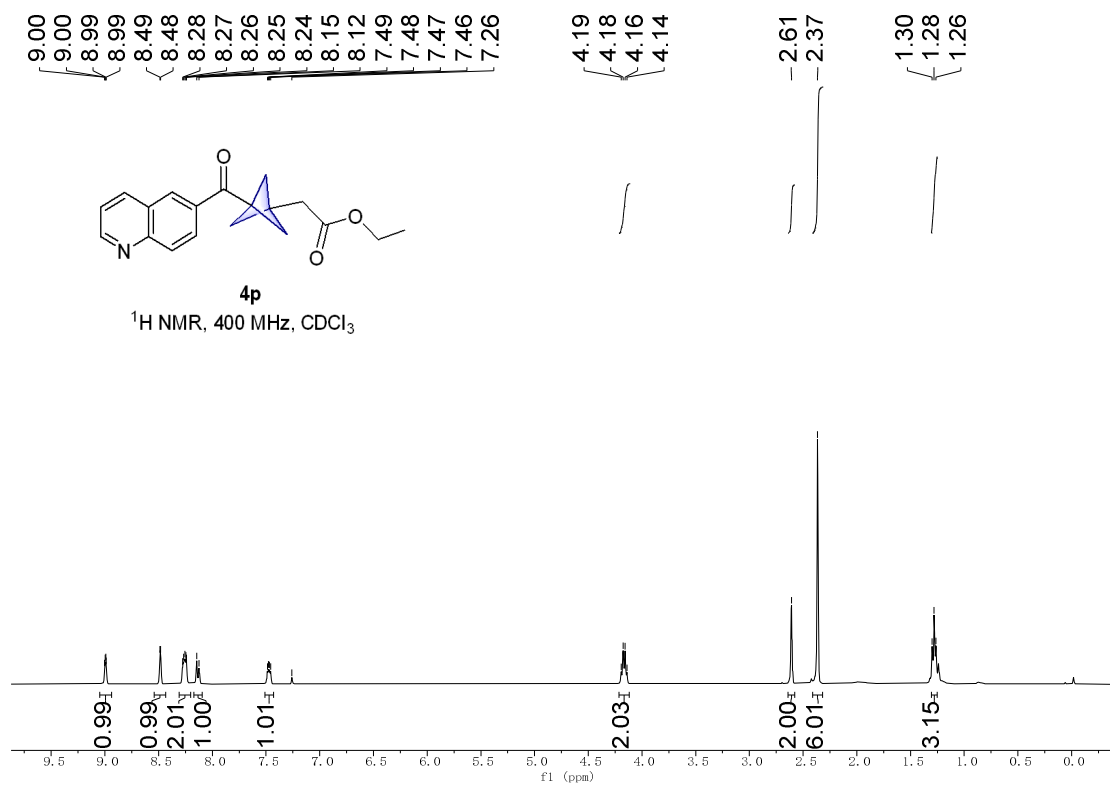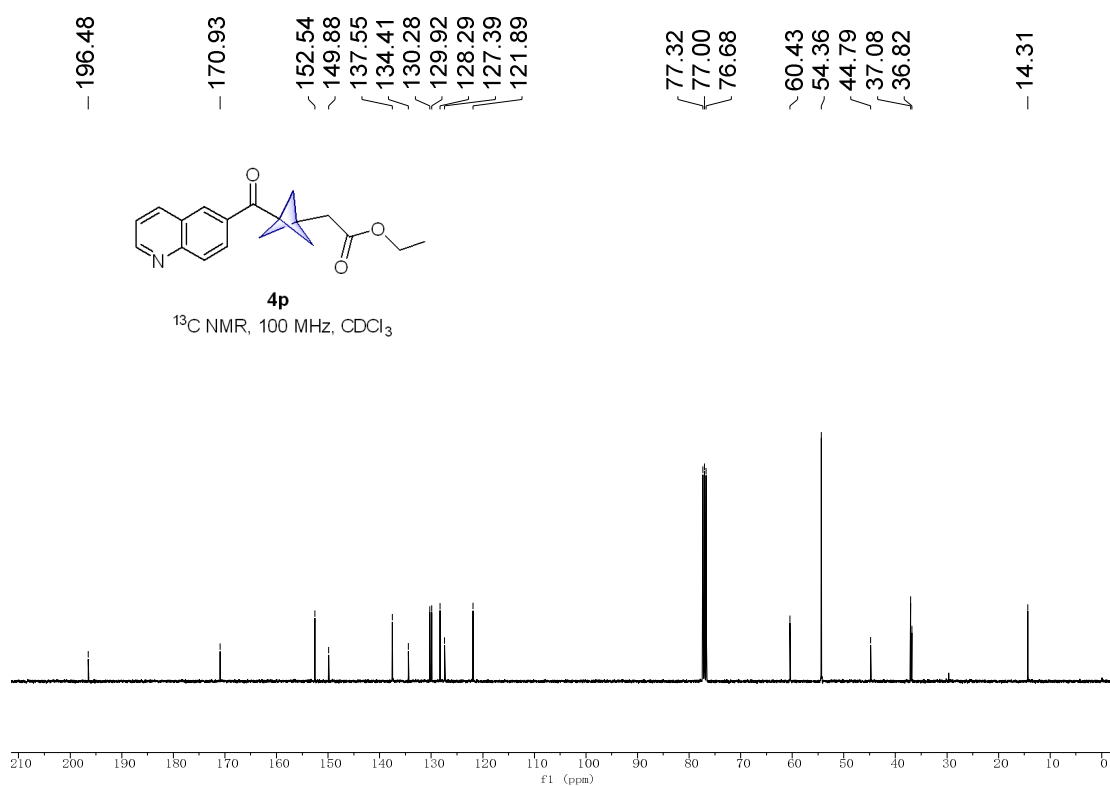

**Ethyl 2-(3-(2-naphthoyl)bicyclo[1.1.1]pentan-1-yl)acetate (4q)**

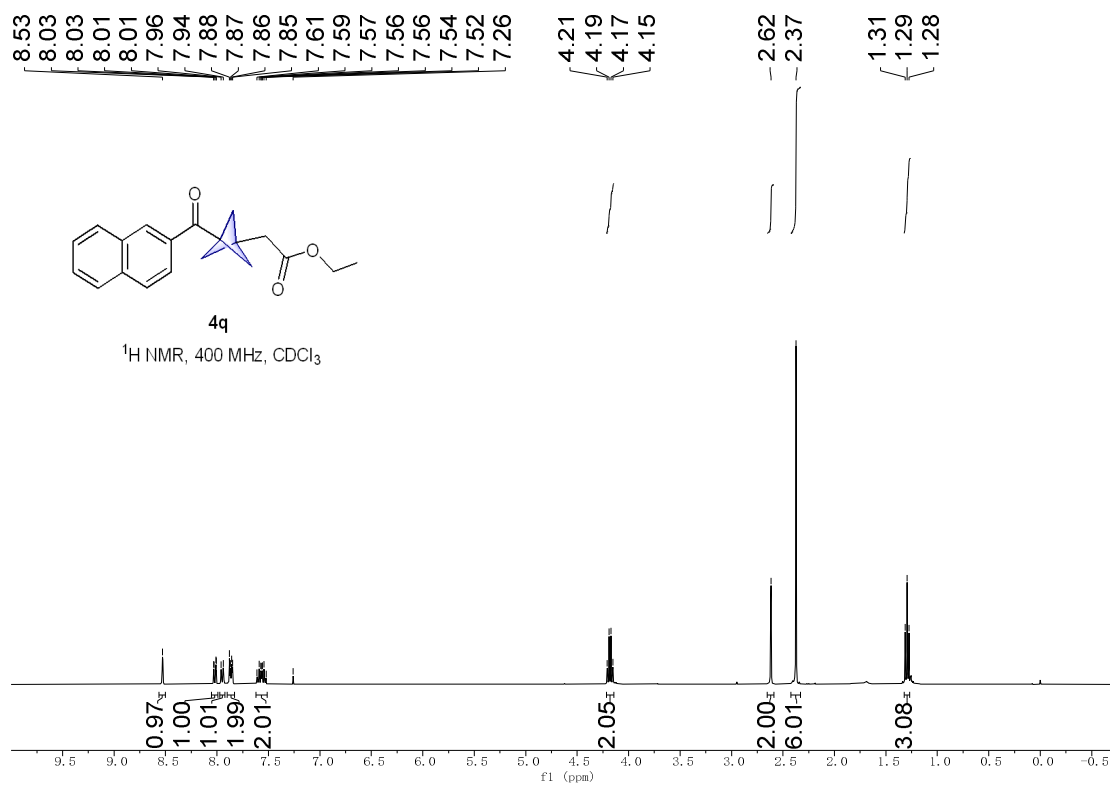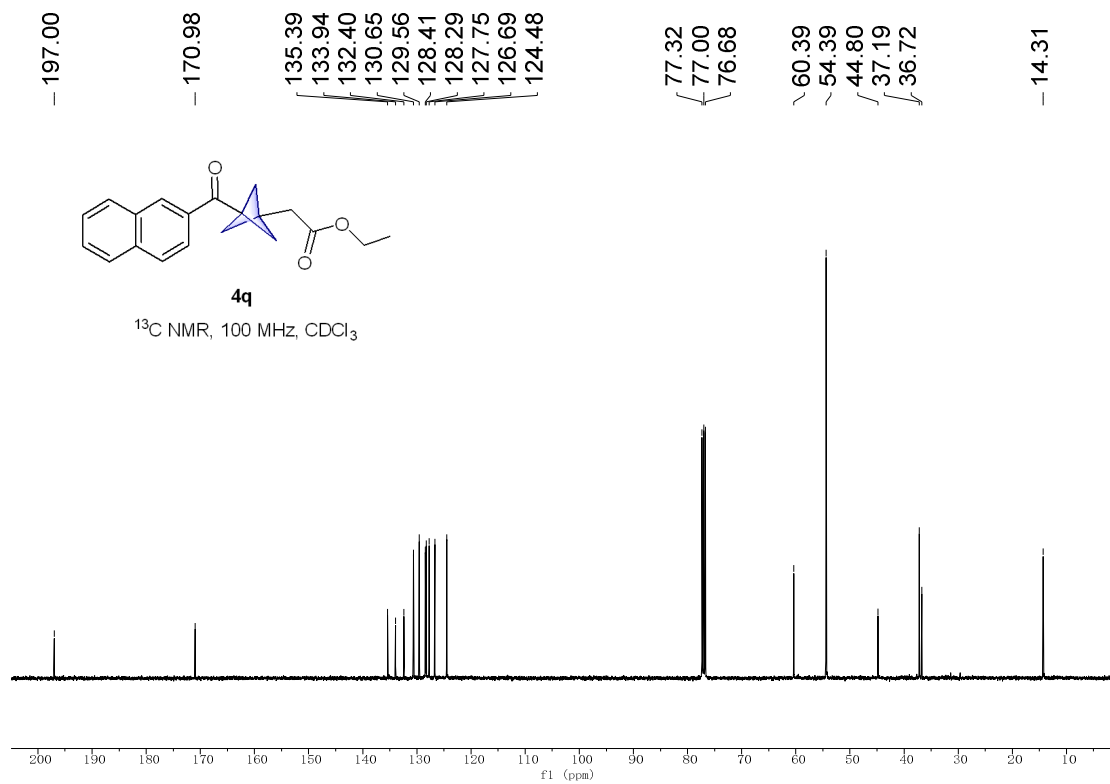

**Ethyl 2-(3-(2,3-dihydrobenzo[b][1,4]dioxine-6-carbonyl)bicyclo[1.1.1]pentan-1-yl)acetate (4r)**

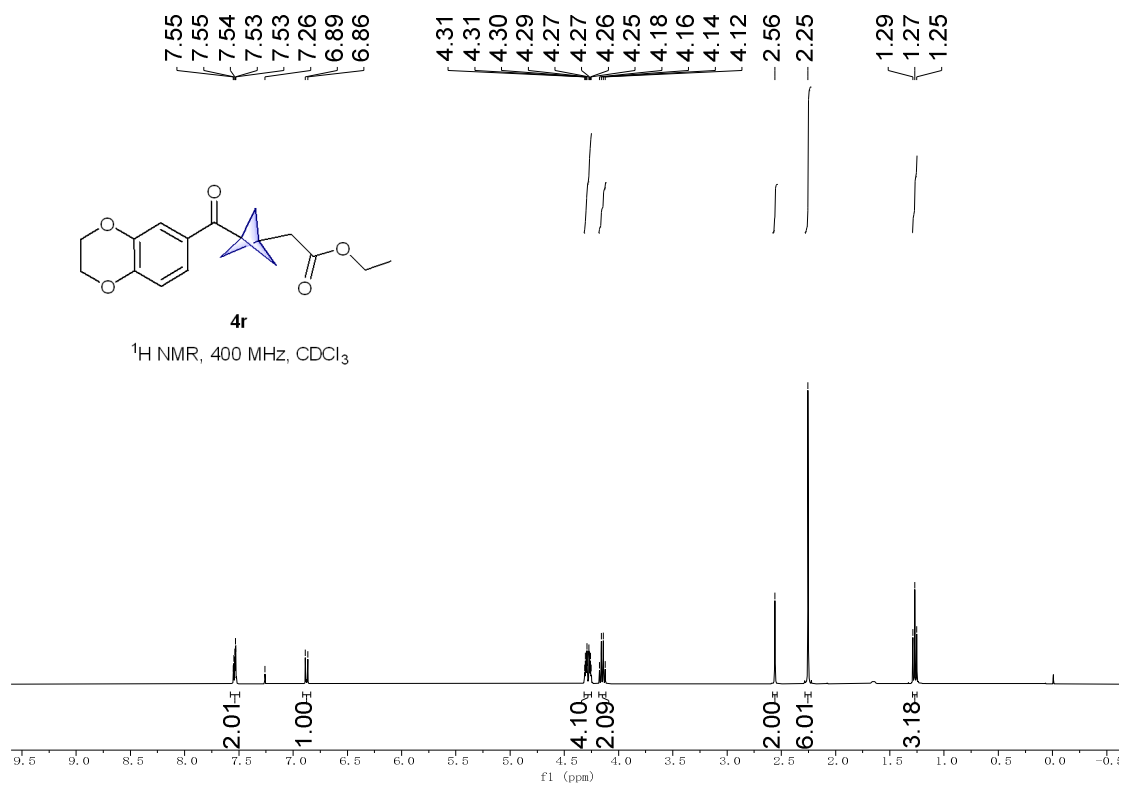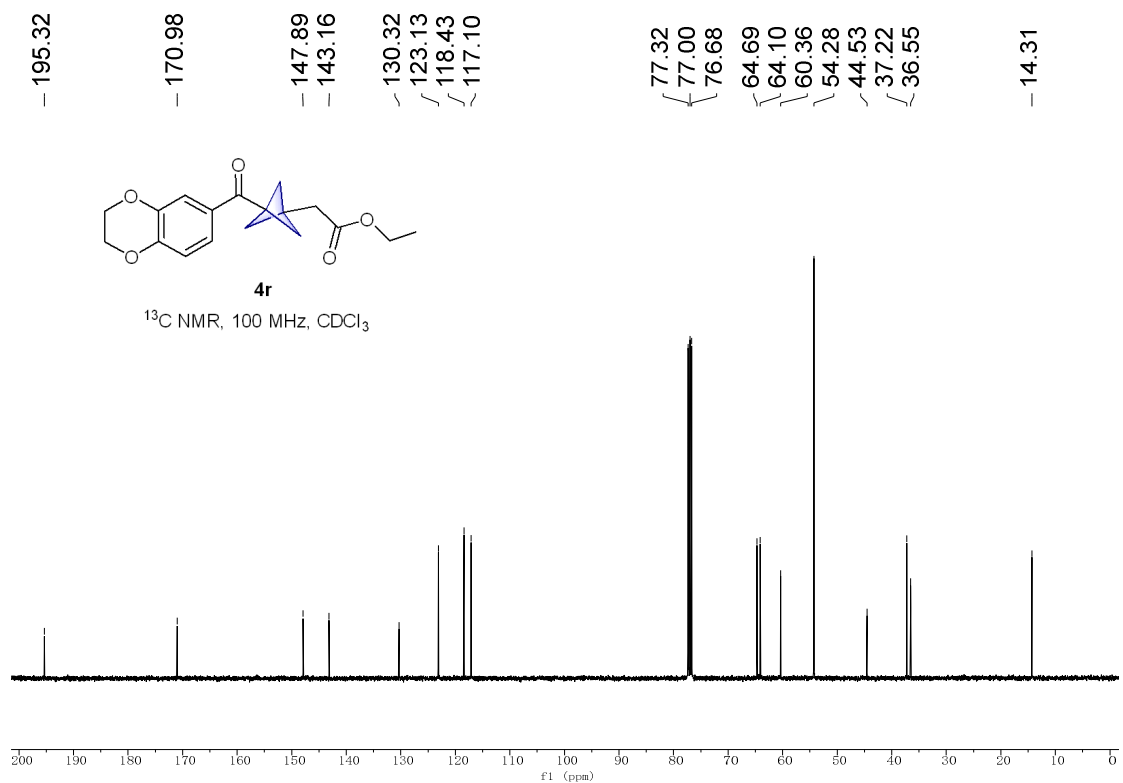

**Ethyl 2-(3-(1-methyl-1H-indole-3-carbonyl)bicyclo[1.1.1]pentan-1-yl)acetate (4s):**

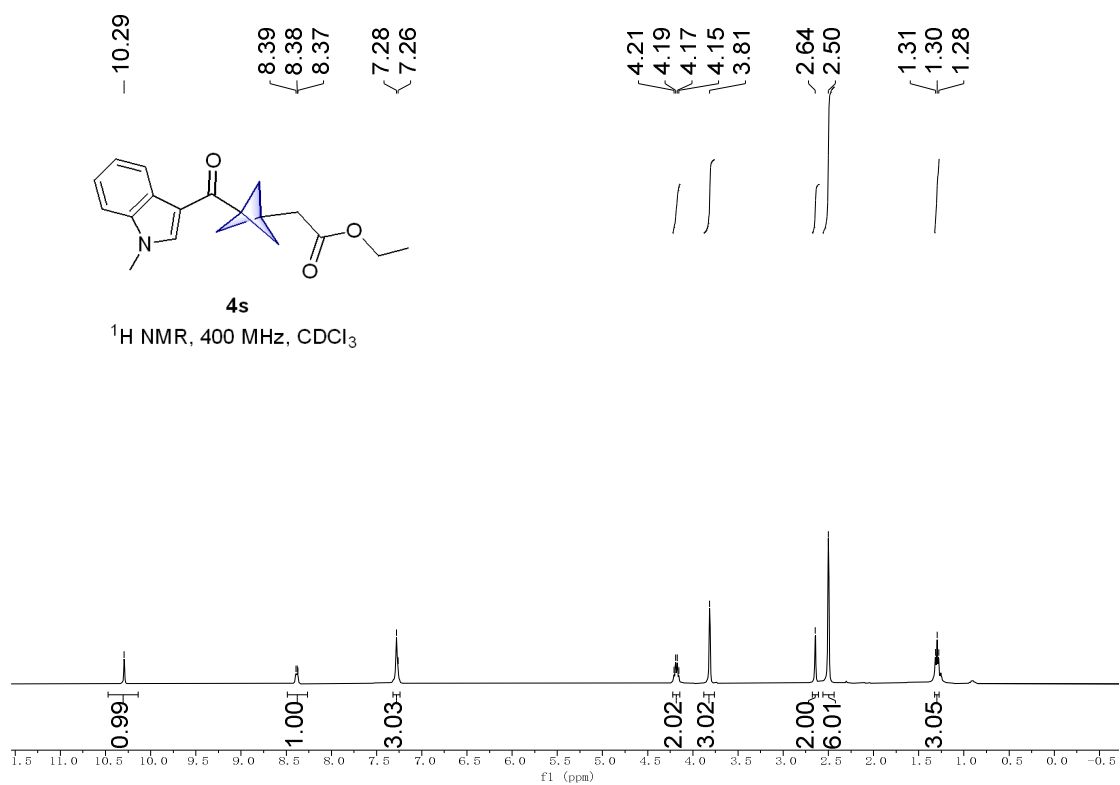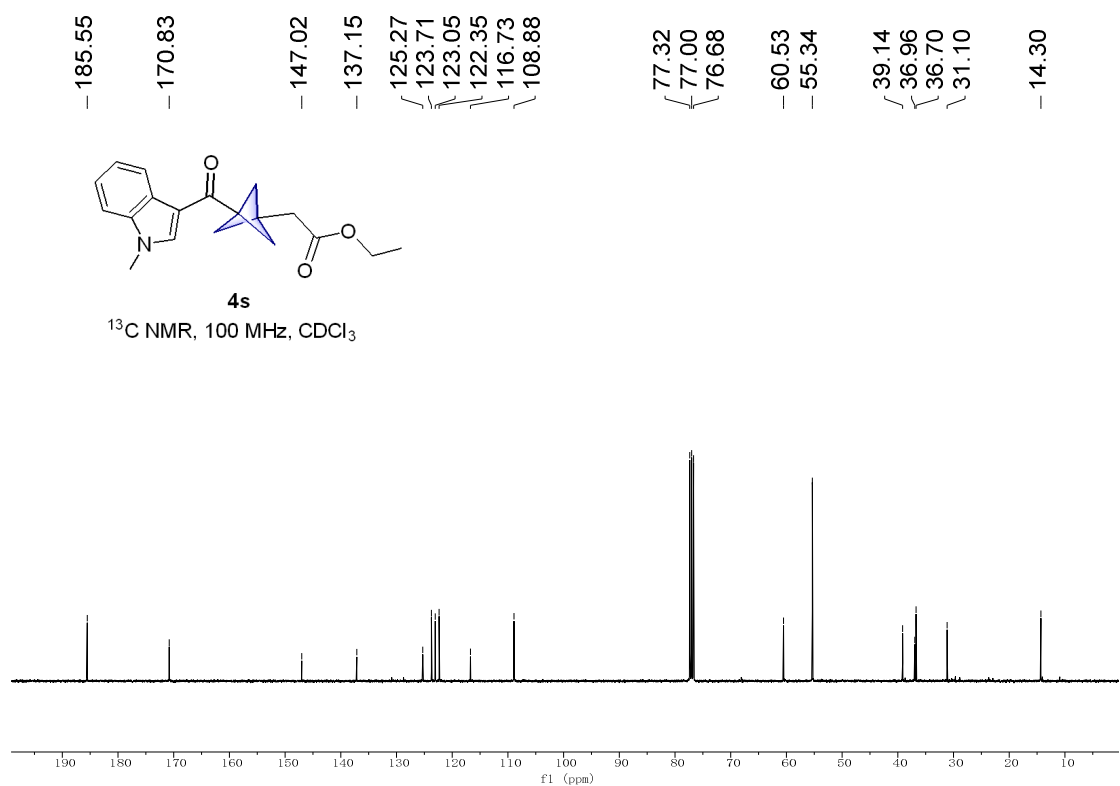



**Ethyl 2-(3-(thiophene-3-carbonyl)bicyclo[1.1.1]pentan-1-yl)acetate (4t)**

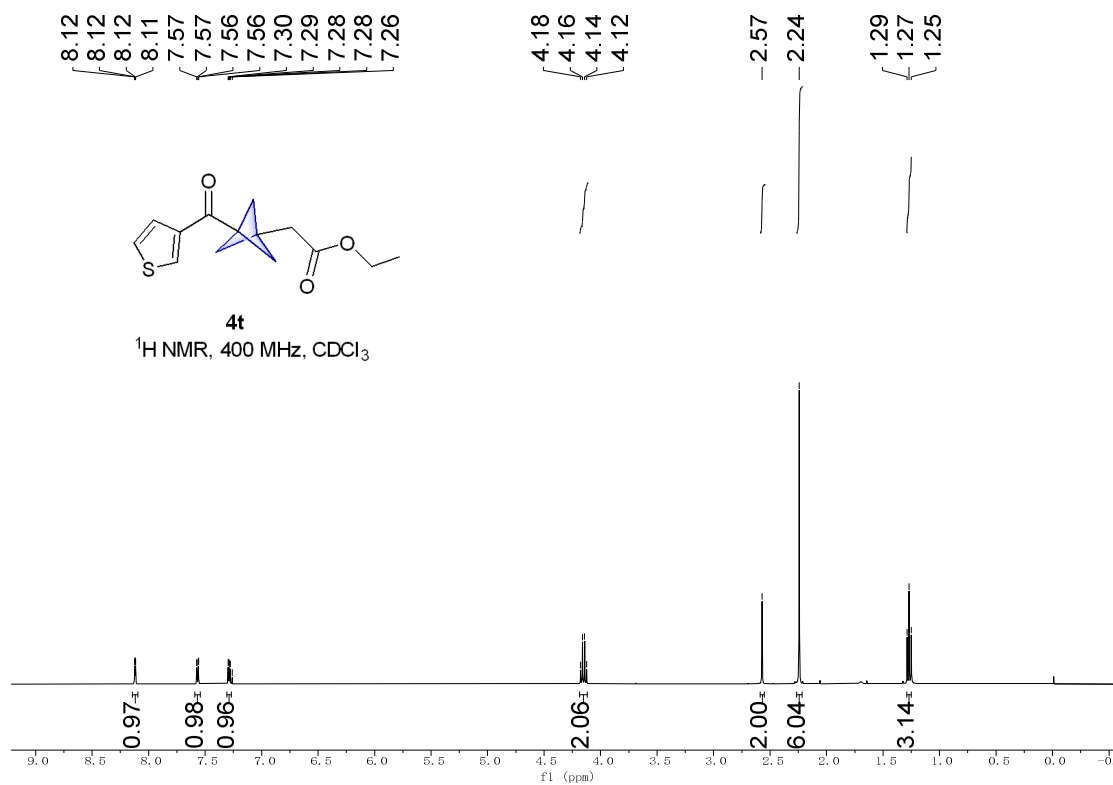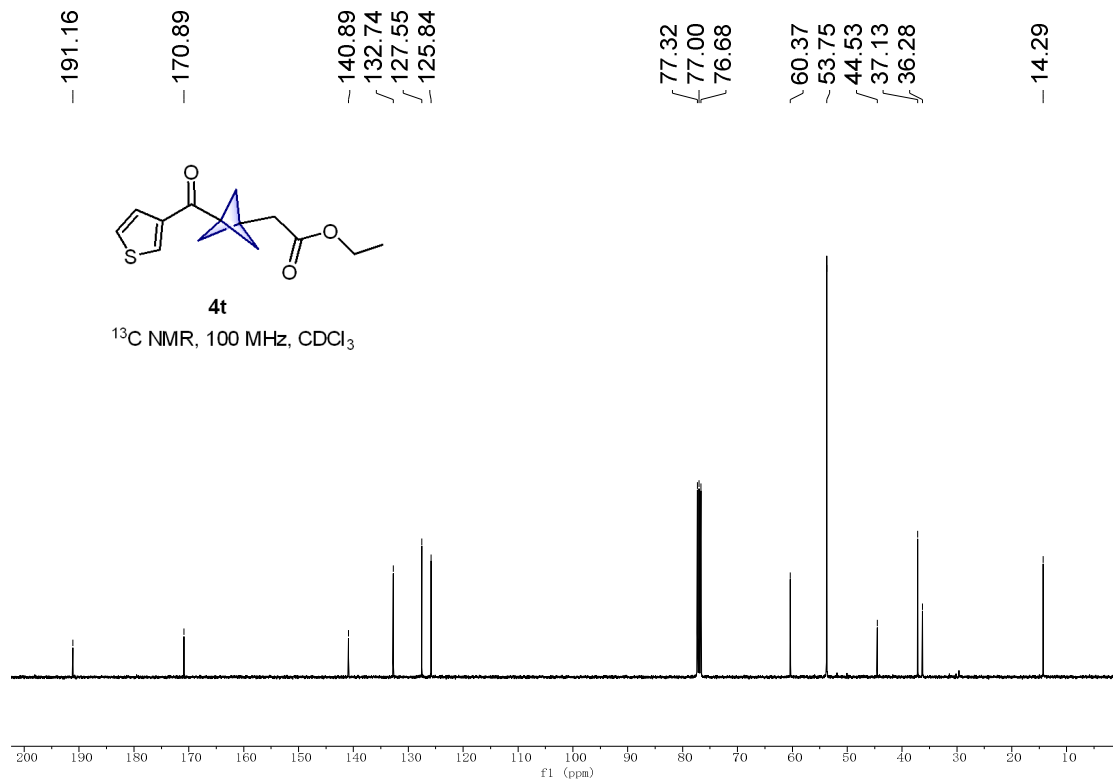

**Ethyl 2-(3-(1-methyl-3a,7a-dihydro-1H-indazole-3-carbonyl)bicyclo[1.1.1]pentan-1-yl)acetate (4u)**

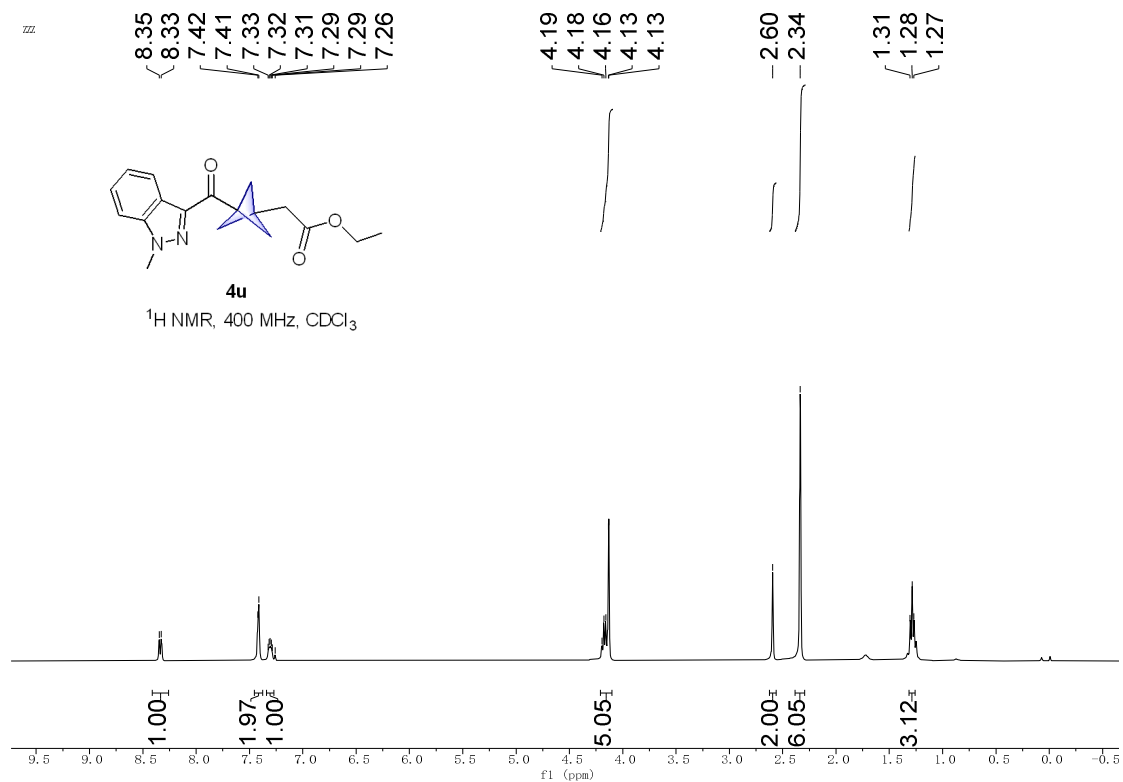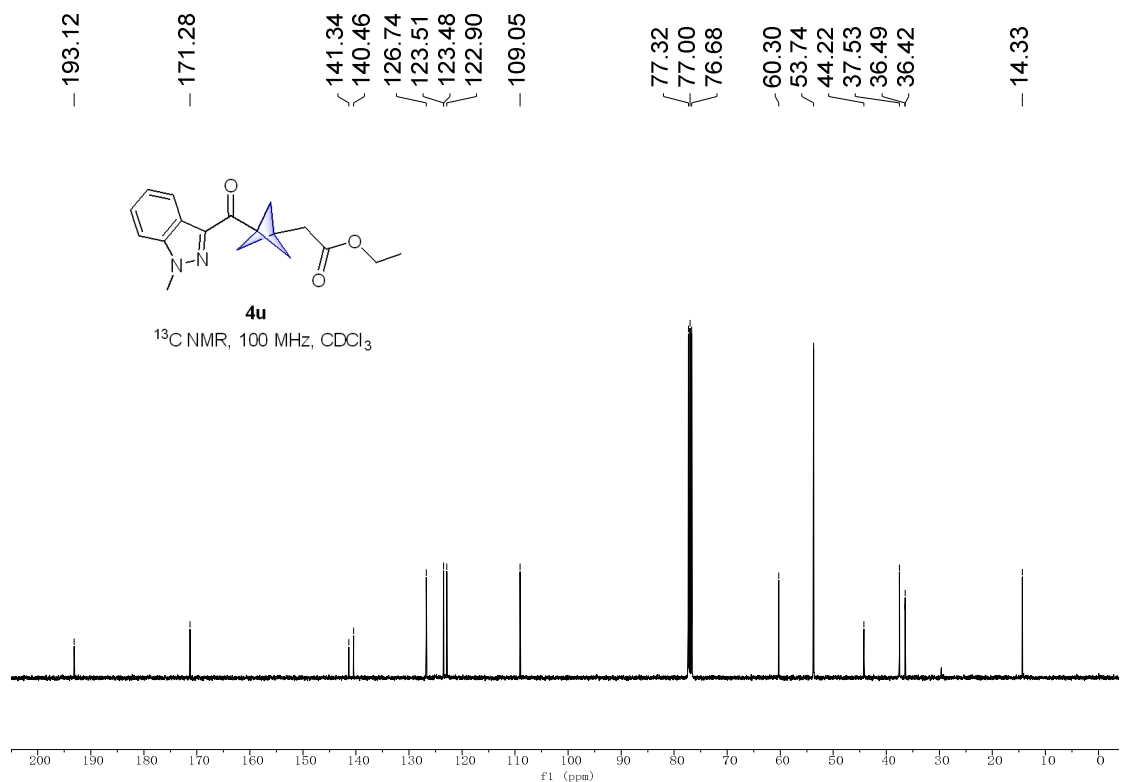

**Ethyl 2-(3-nicotinoylbicyclo[1.1.1]pentan-1-yl)acetate (4v)**

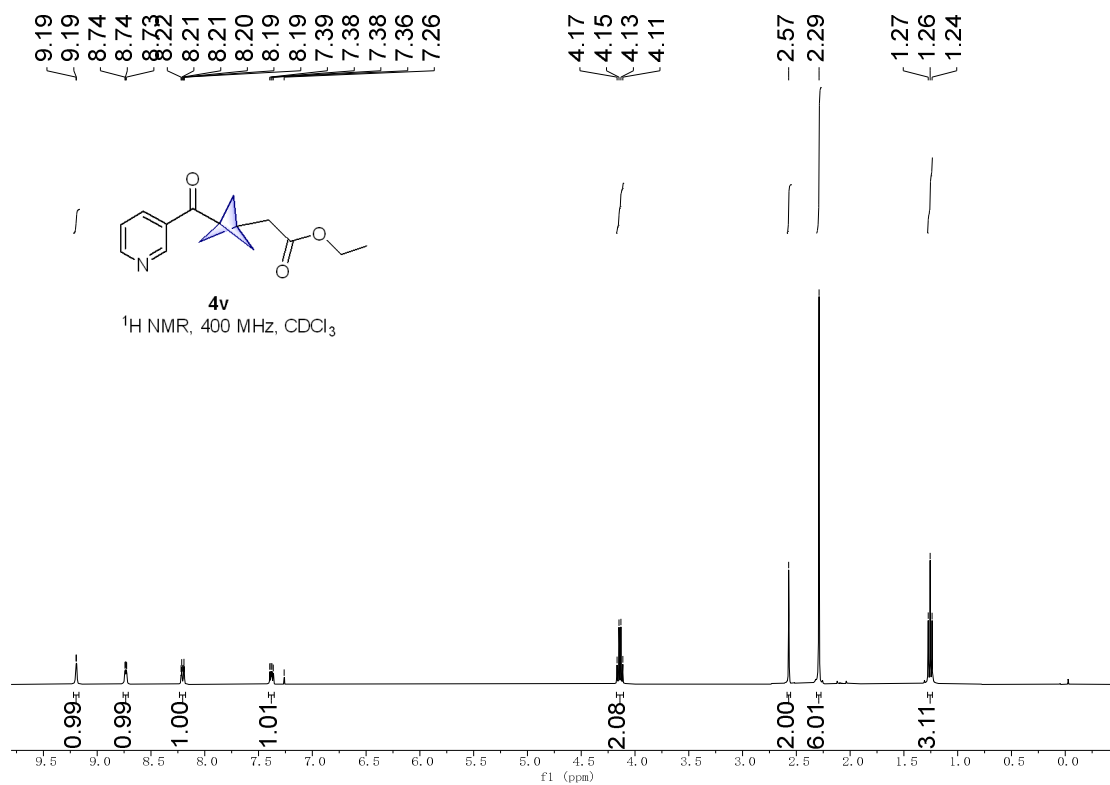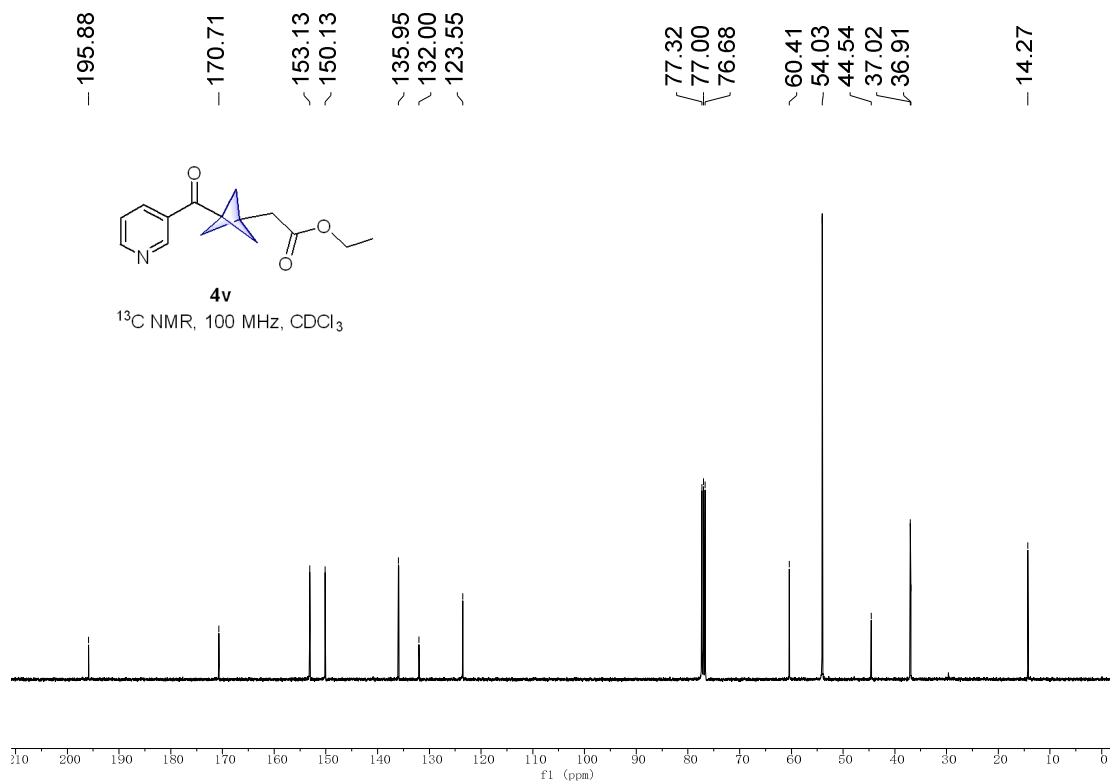

**Ethyl 2-(3-(1-methyl-1H-pyrazole-3-carbonyl)bicyclo[1.1.1]pentan-1-yl)acetate (4w)**

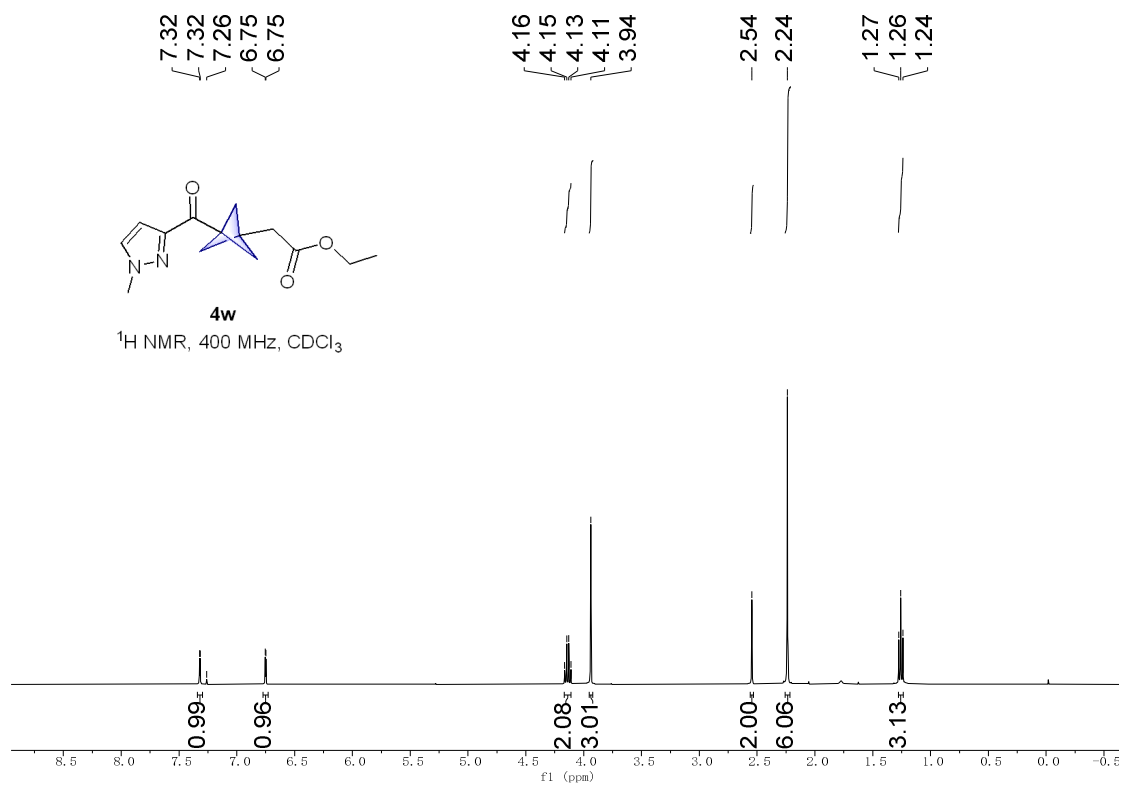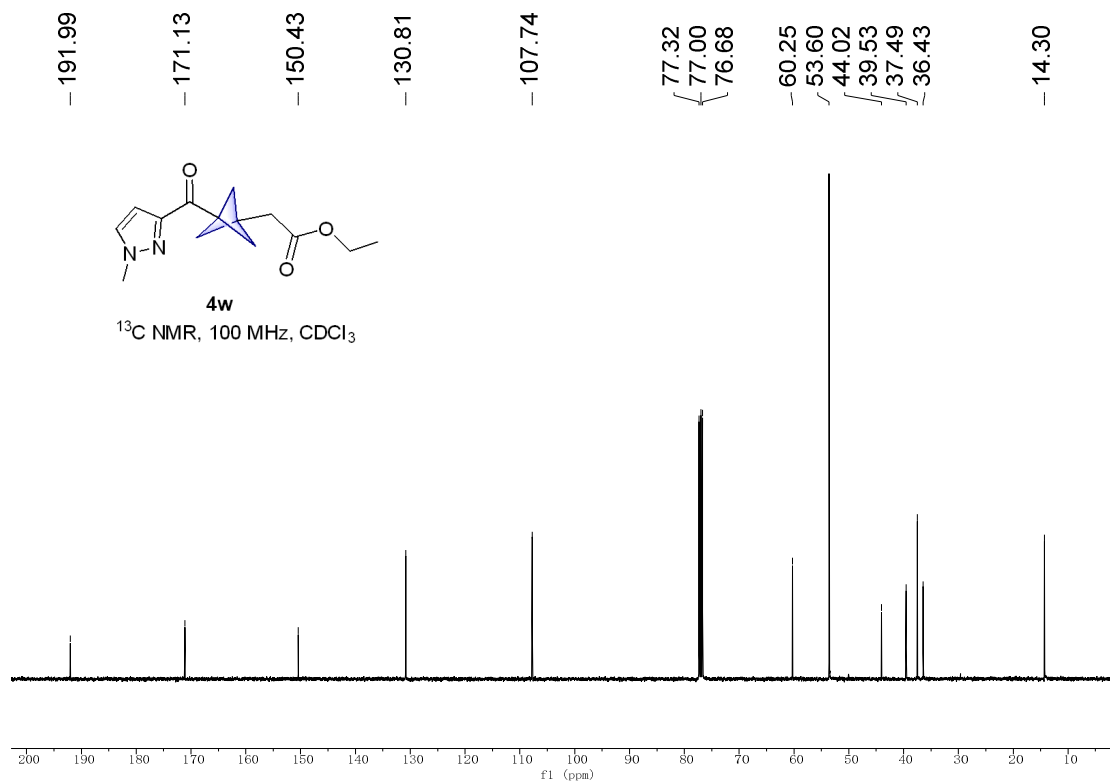

**Adamantan-1-yl 2-(3-(4-fluorobenzoyl)bicyclo[1.1.1]pentan-1-yl)acetate (4x)**

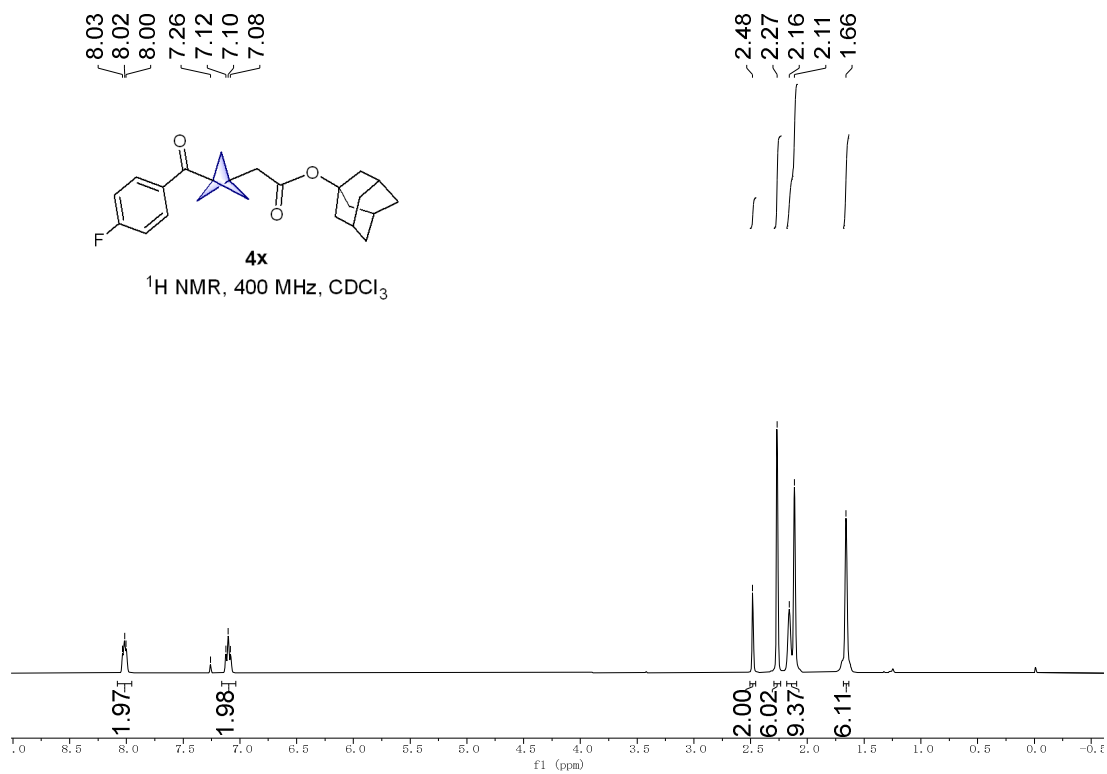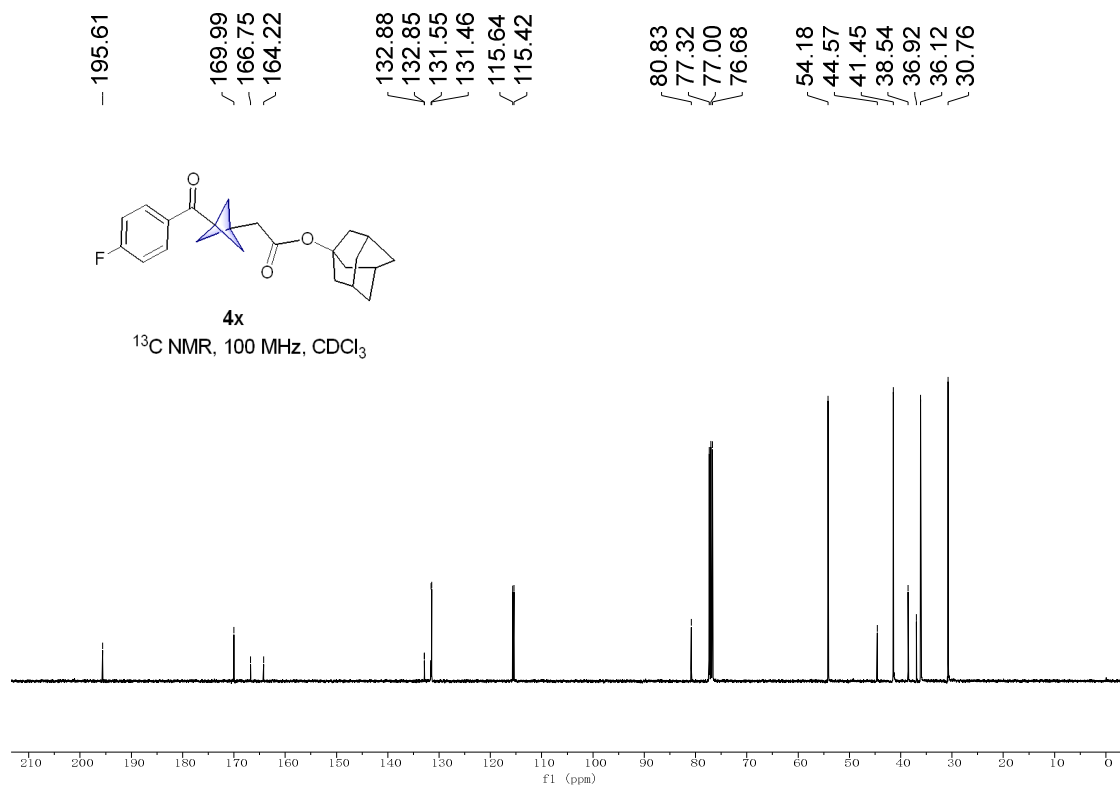

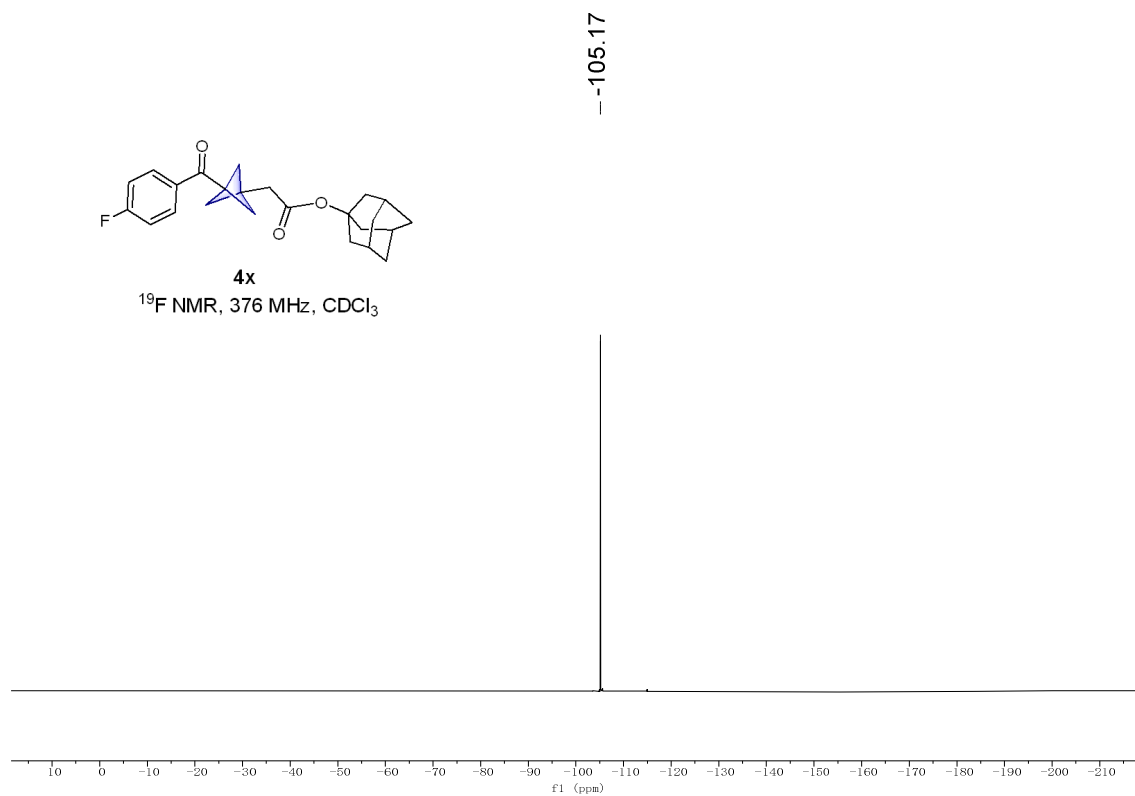

**Tert-butyl 2-(3-(4-fluorobenzoyl)bicyclo[1.1.1]pentan-1-yl)acetate (4y)**

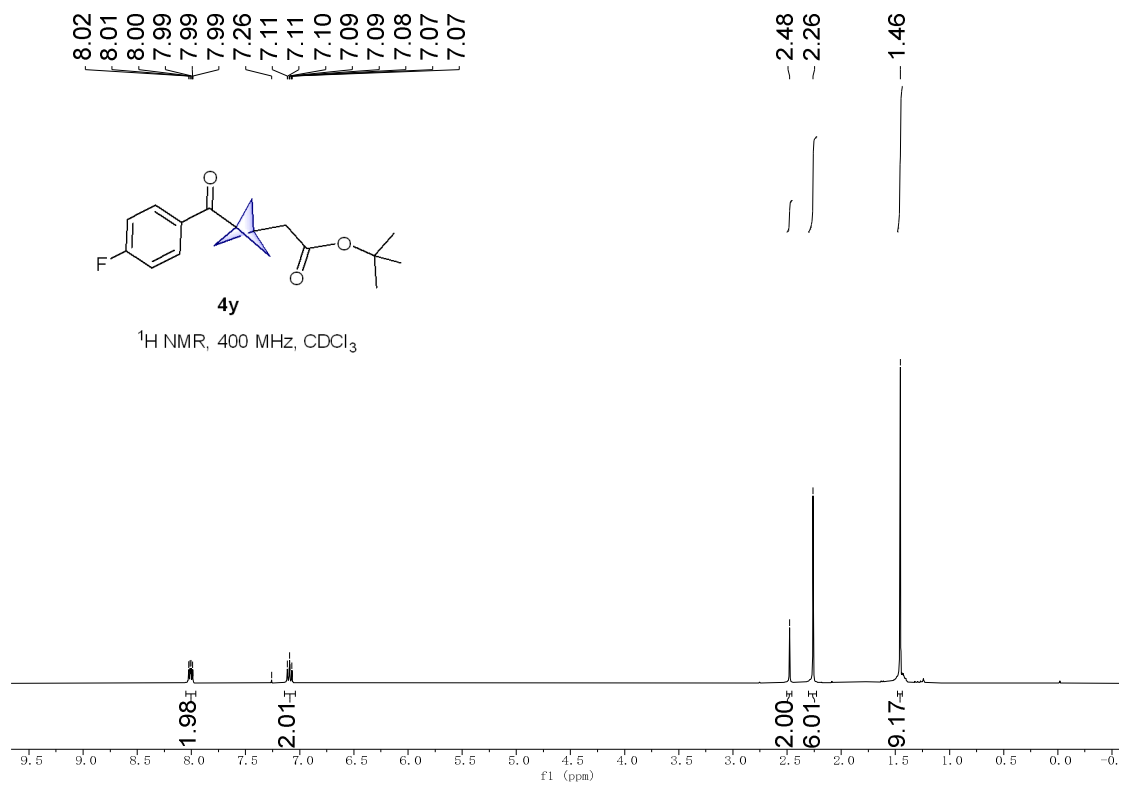

- 195.51

170.19  
166.77  
164.24

132.95  
132.92  
131.53  
131.44  
115.63  
115.41

80.66  
77.32  
77.00  
76.68

54.20  
44.56  
38.44  
36.93  
28.17

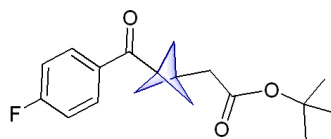

4y

<sup>13</sup>C NMR, 100 MHz, CDCl<sub>3</sub>

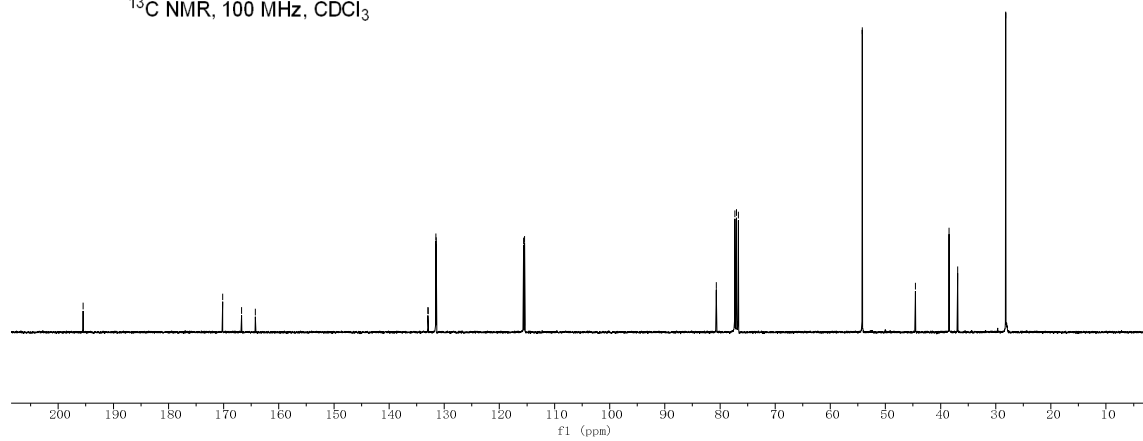

-- 105.23

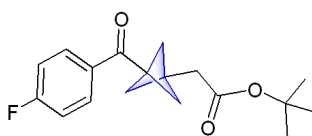

4y

<sup>19</sup>F NMR, 376 MHz, CDCl<sub>3</sub>

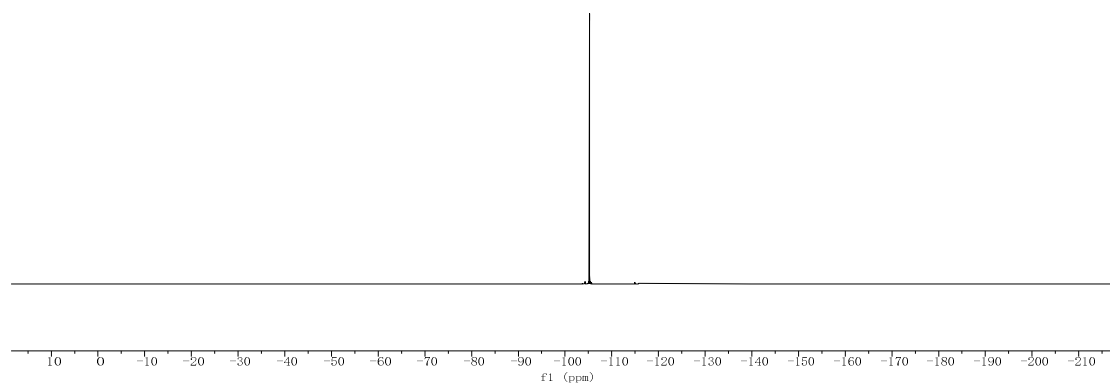

2,4-dimethylpentan-3-yl 2-(3-(4-fluorobenzoyl)bicyclo[1.1.1]pentan-1-yl)acetate (4z)

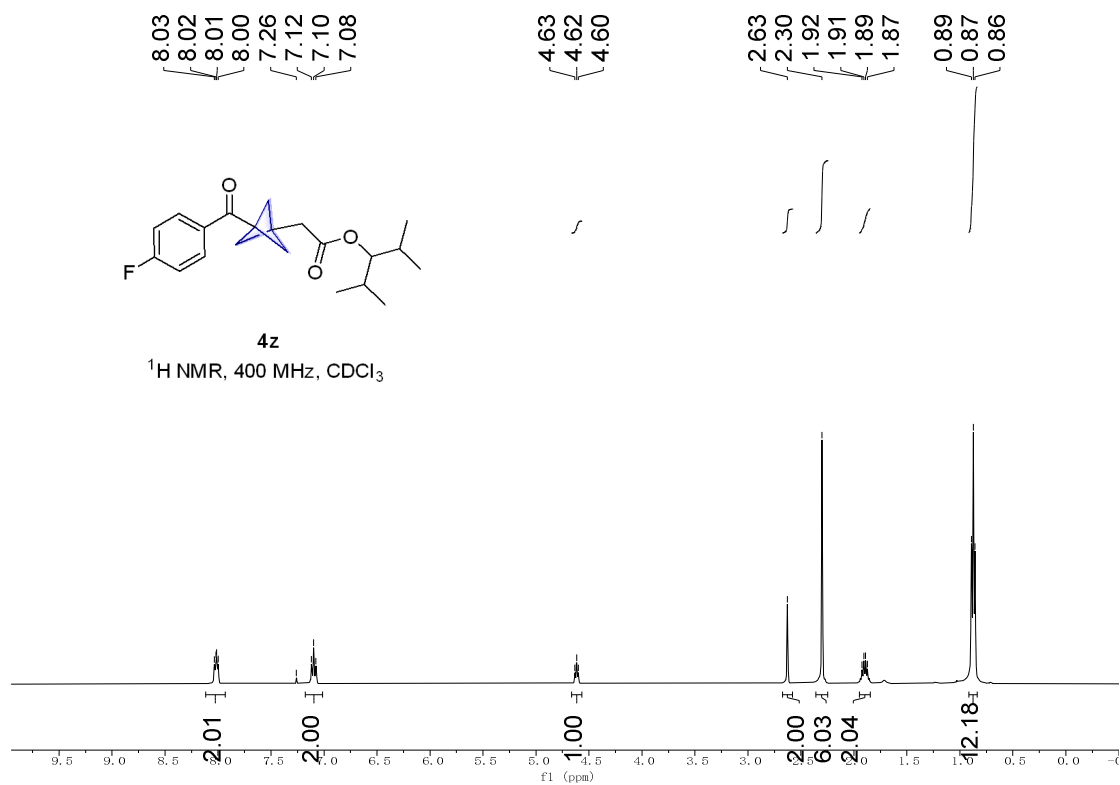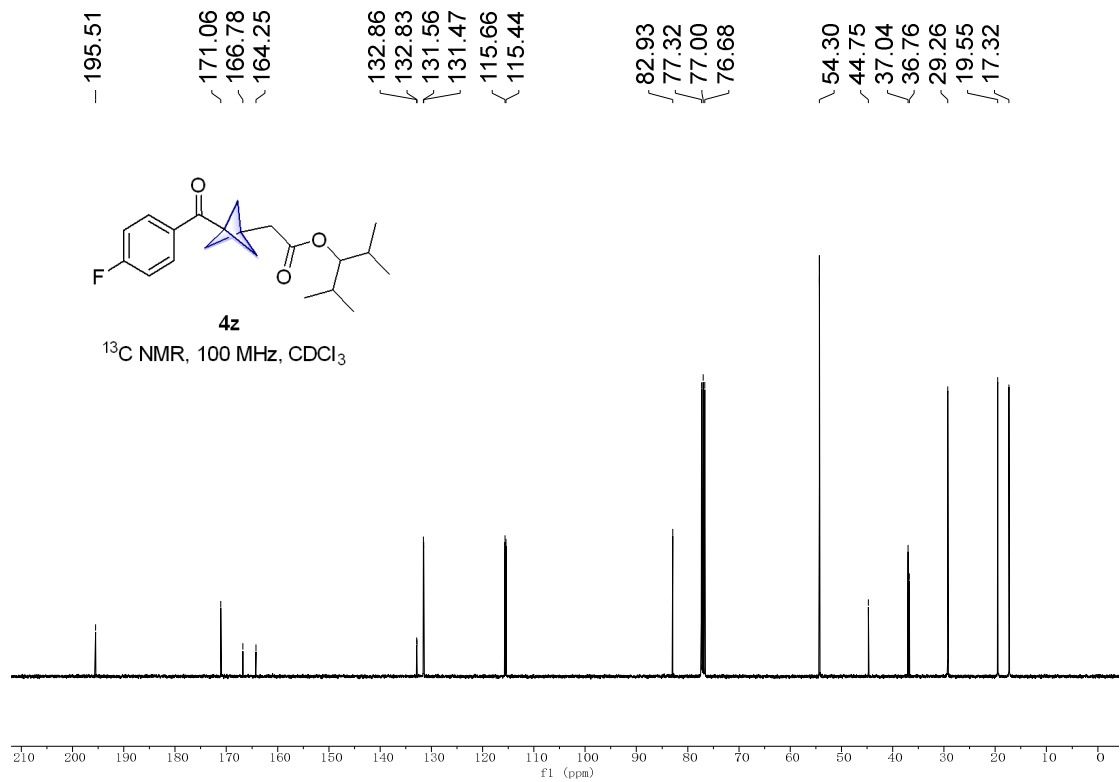



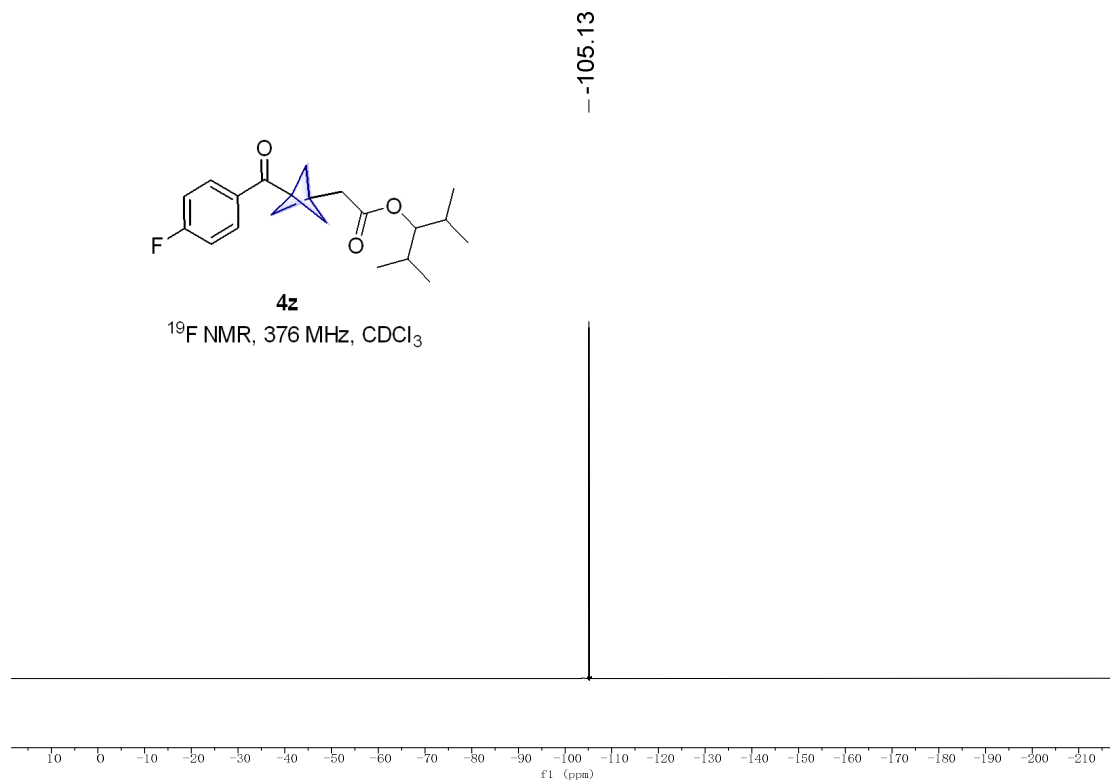

**Cyclohexyl 2-(3-(4-fluorobenzoyl)bicyclo[1.1]pentan-1-yl)acetate (4aa)**

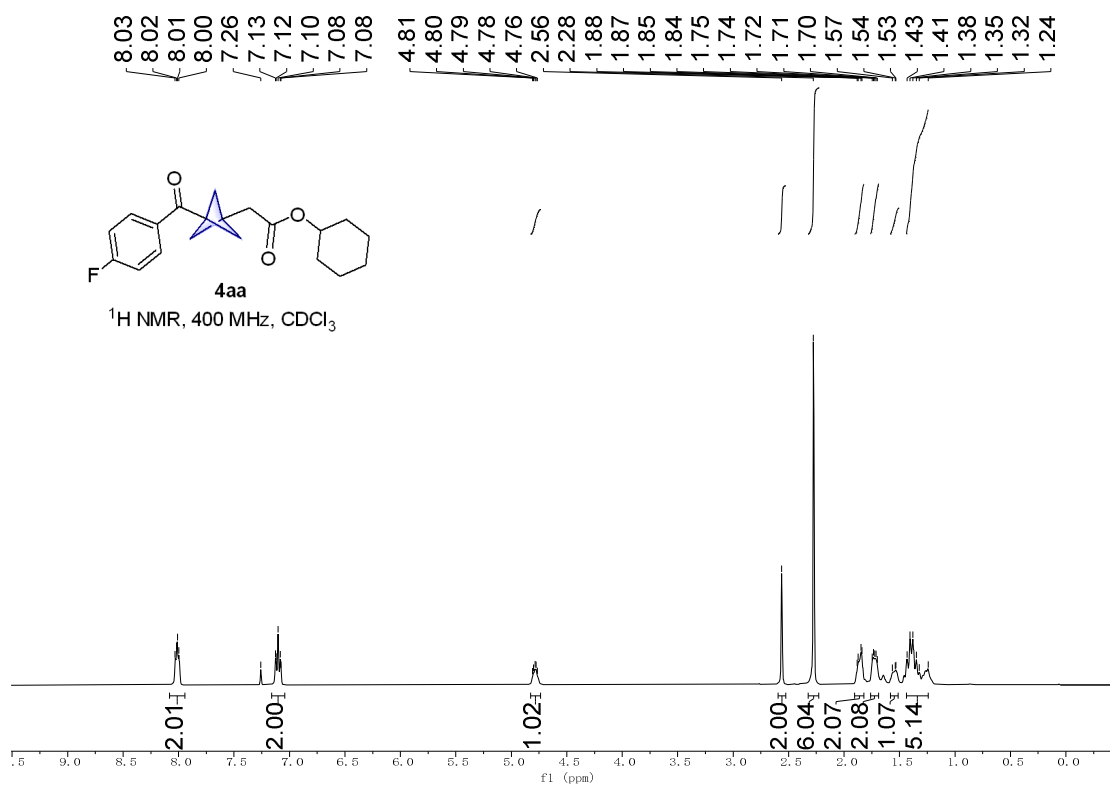

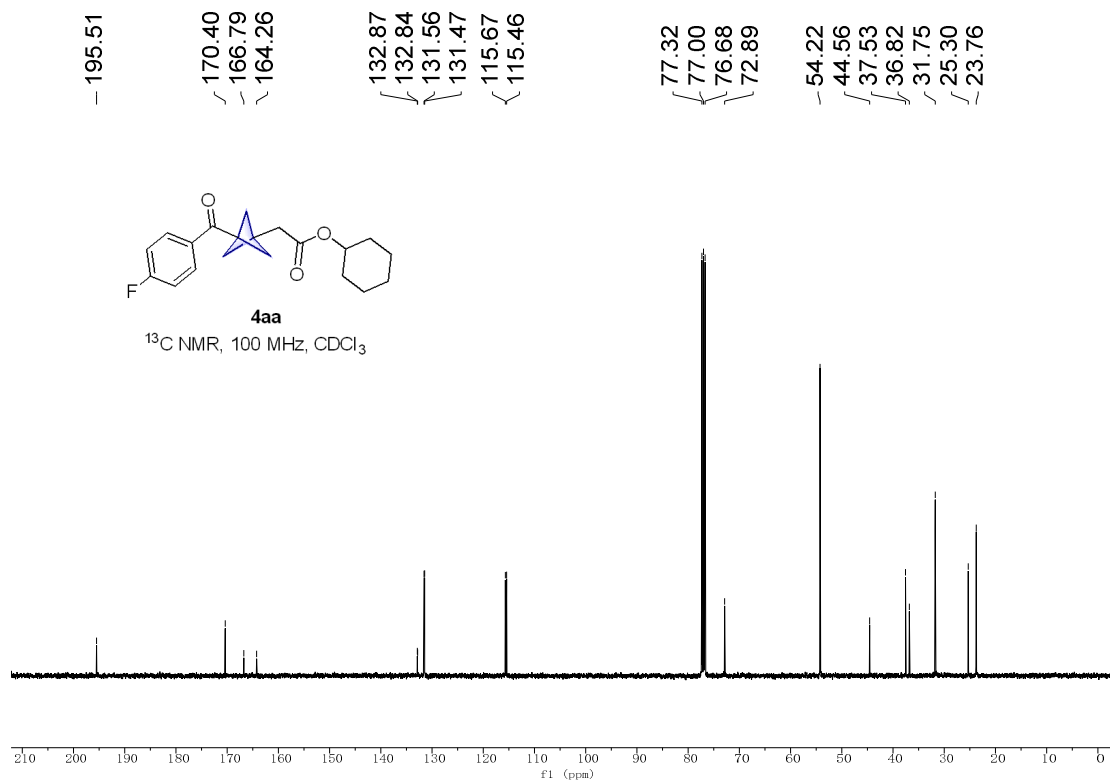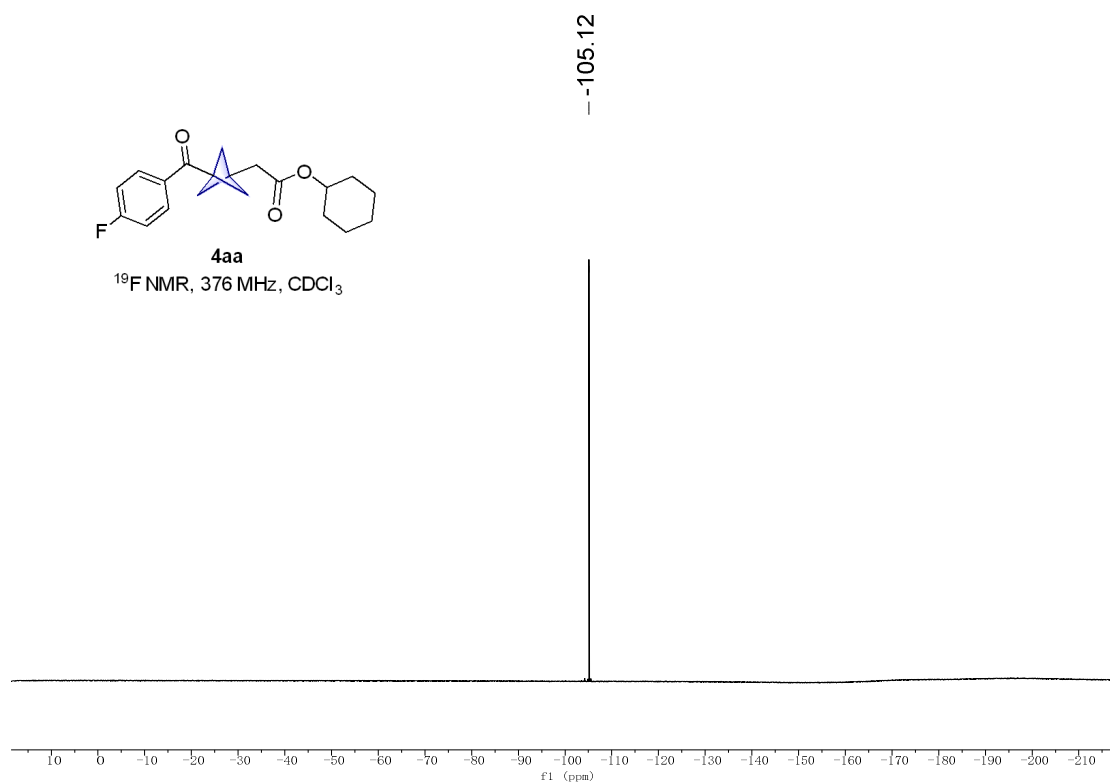

### Benzyl 2-(3-(4-fluorobenzoyl)bicyclo[1.1.1]pentan-1-yl)acetate (4ab)

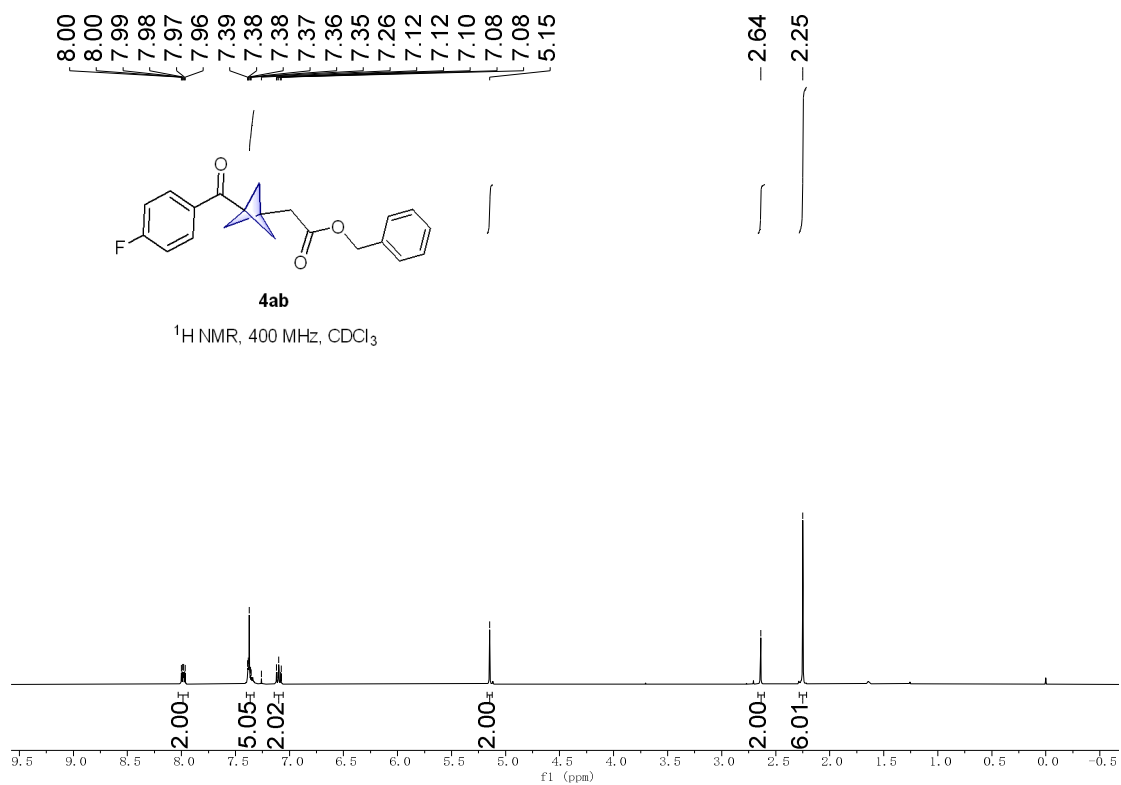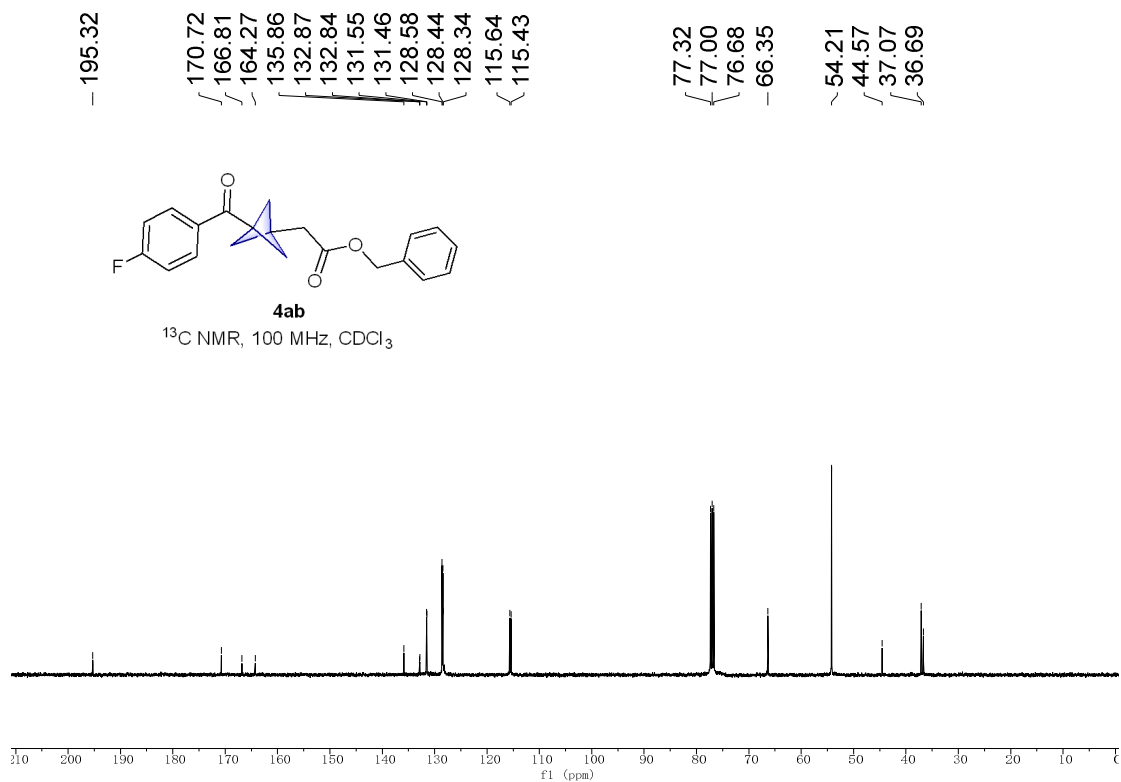

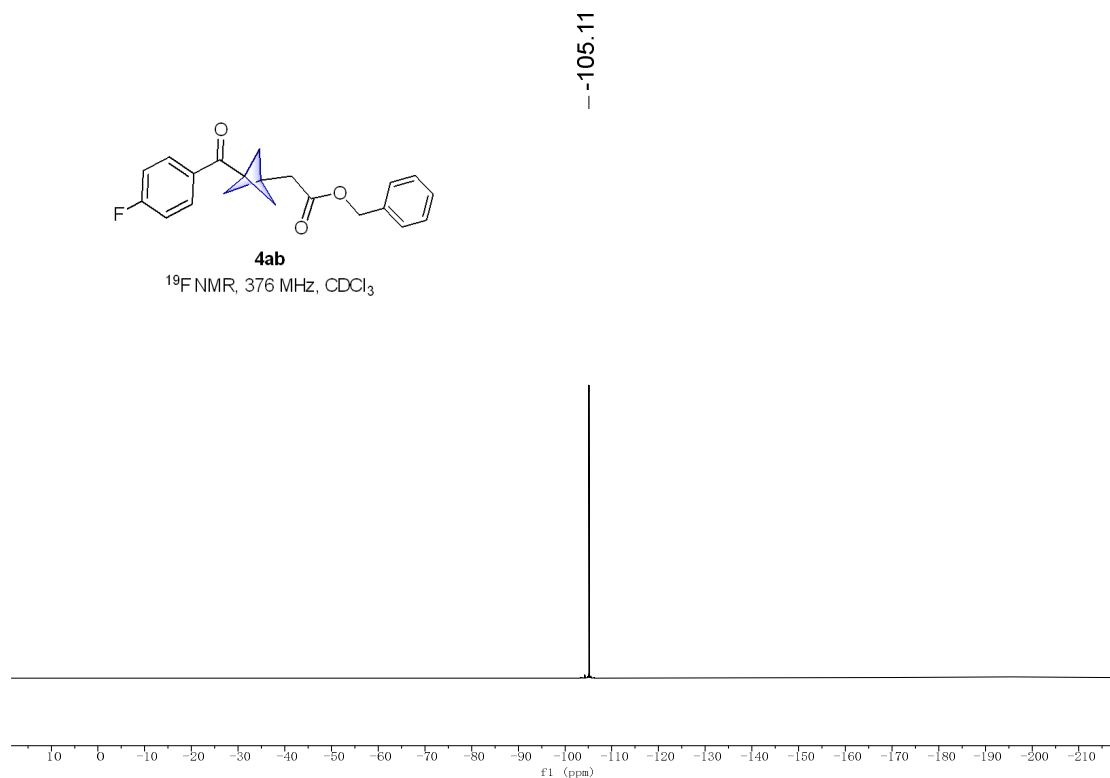

**1-phenylethyl 2-(3-(4-fluorobenzoyl)bicyclo[1.1.1]pentan-1-yl)acetate (4ac)**

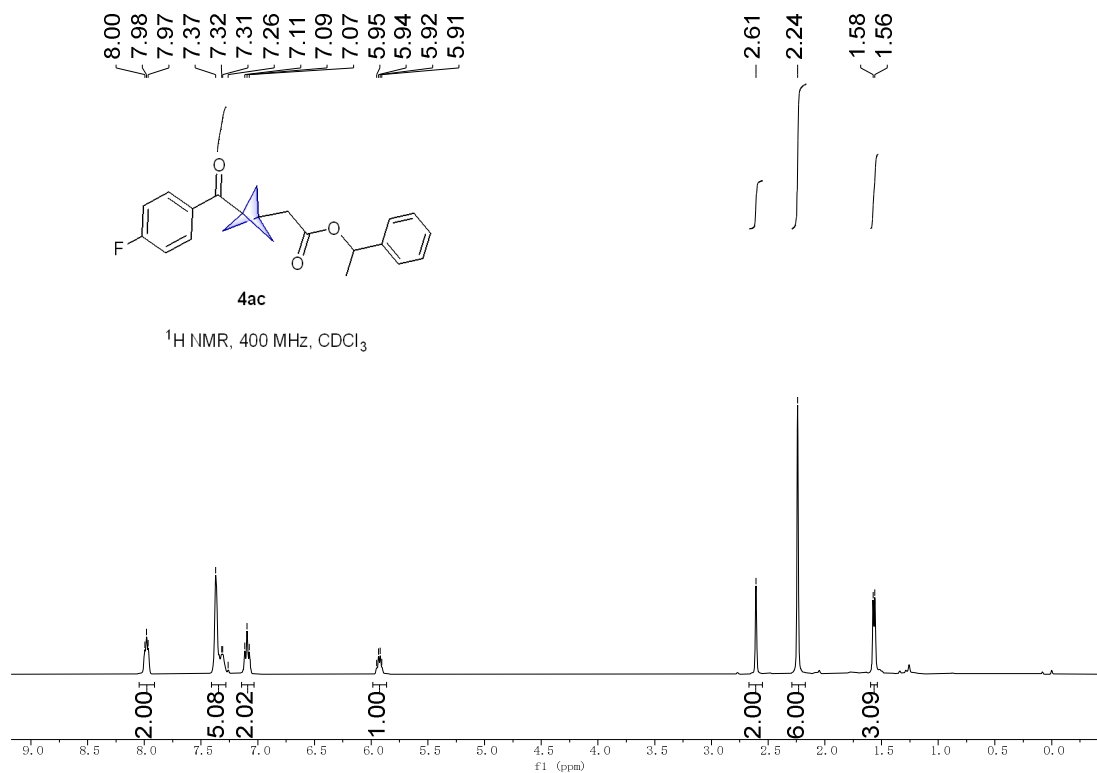

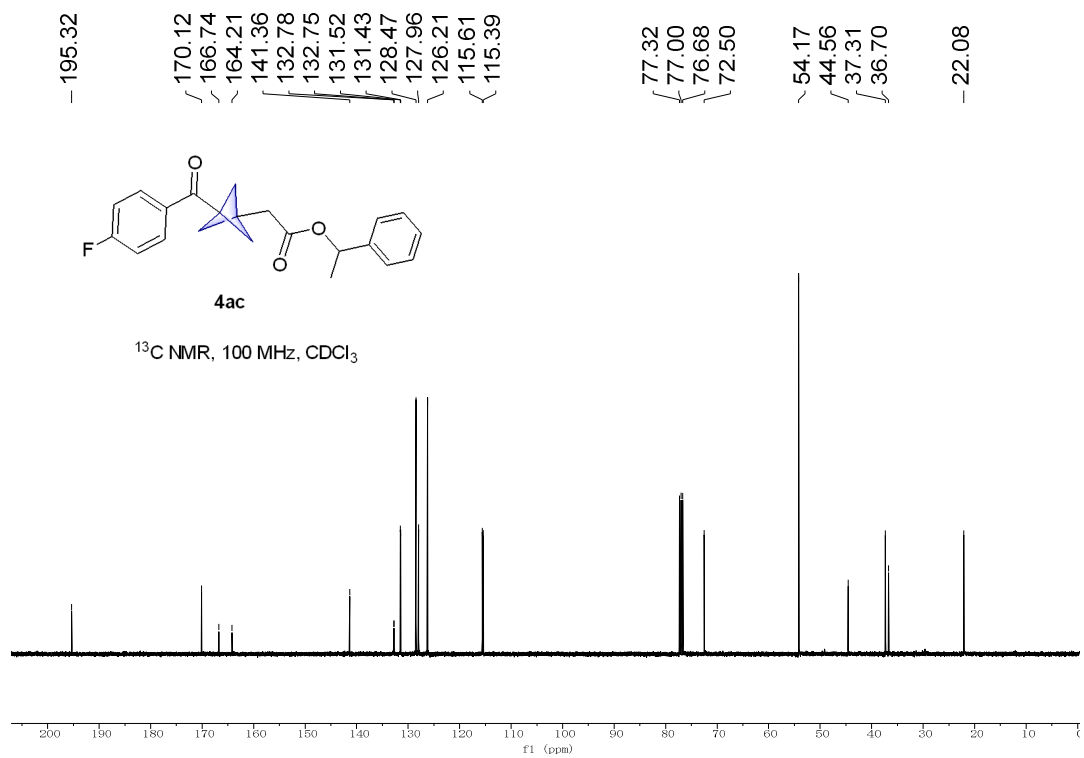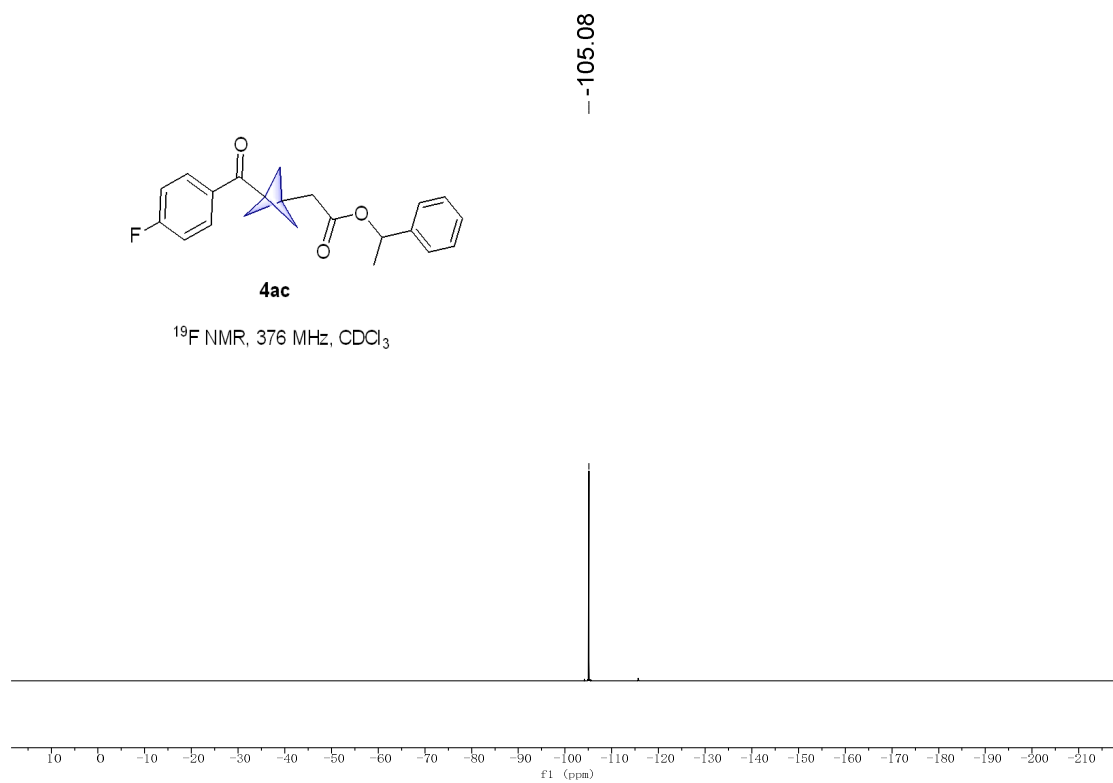

**Thiophen-2-ylmethyl 2-(3-(4-fluorobenzoyl)bicyclo[1.1.1]pentan-1-yl)acetate (4ad)**

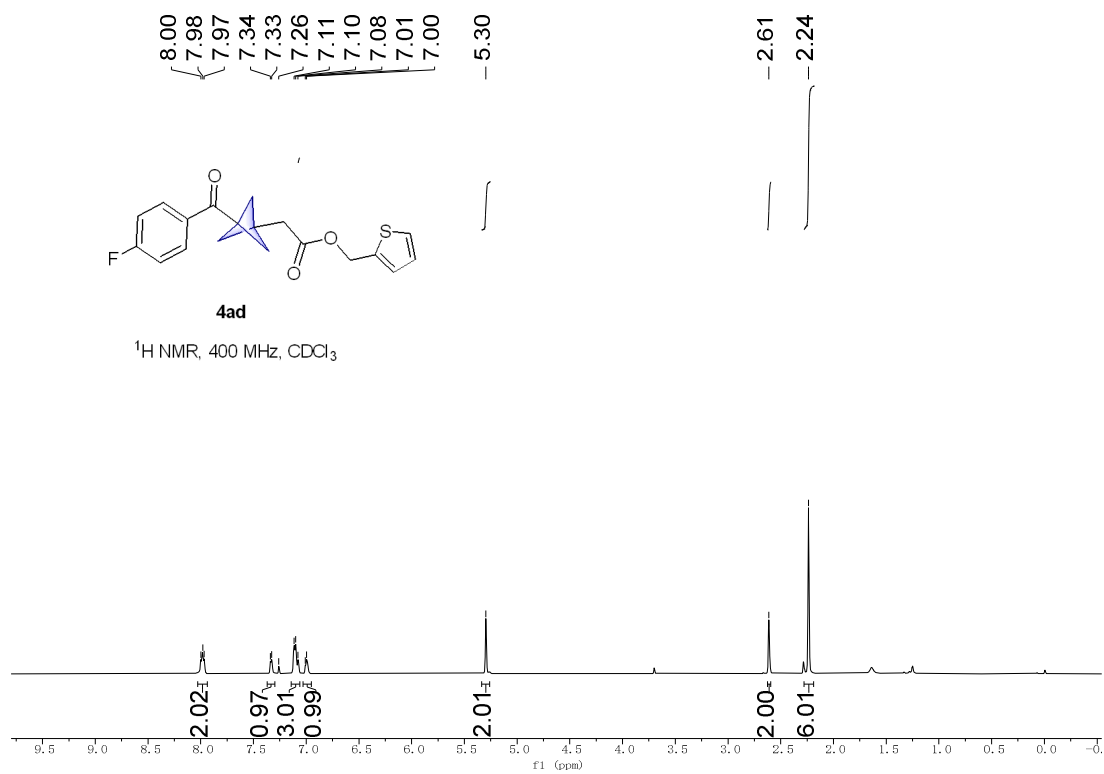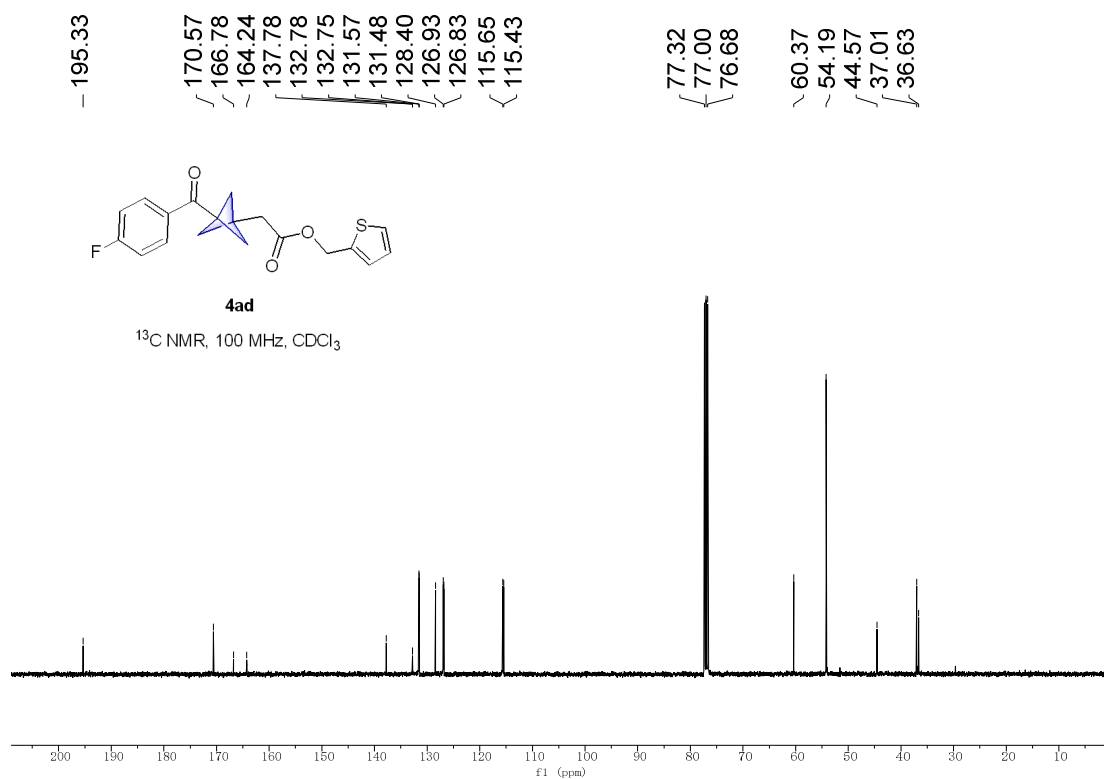

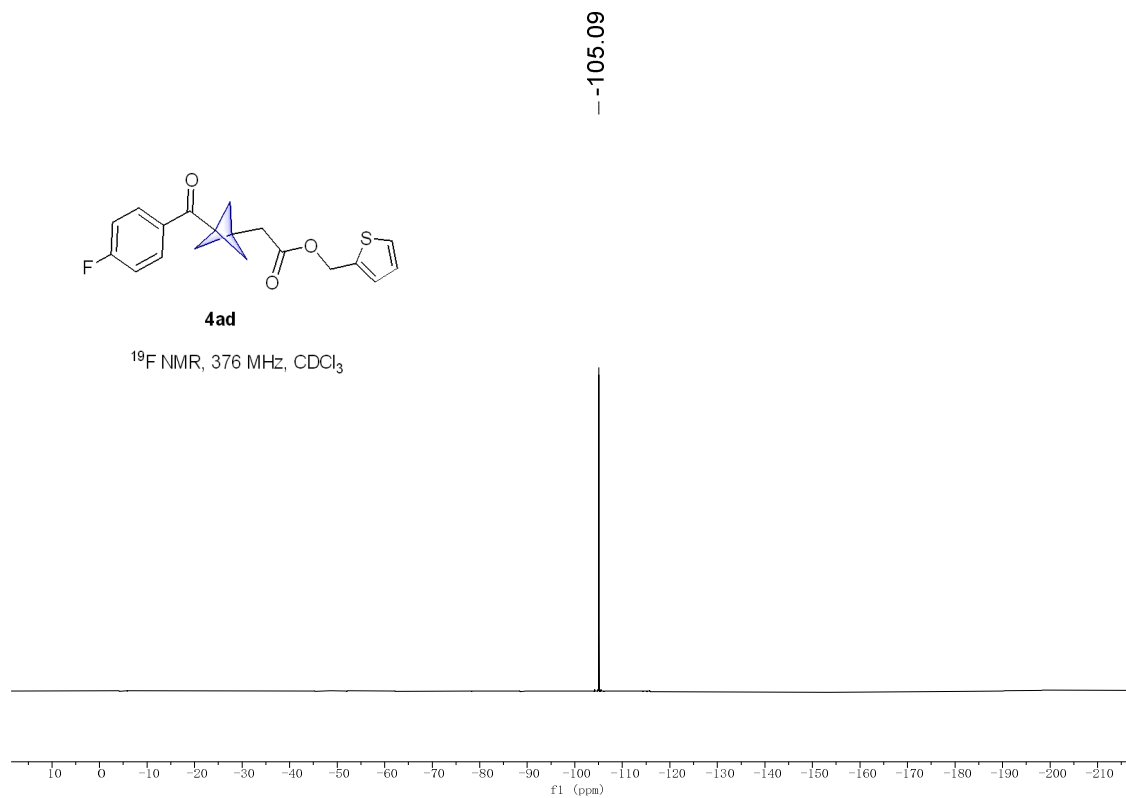

**Tetrahydrofuran-3-yl 2-(3-(4-fluorobenzoyl)bicyclo[1.1.1]pentan-1-yl)acetate (4ae)**

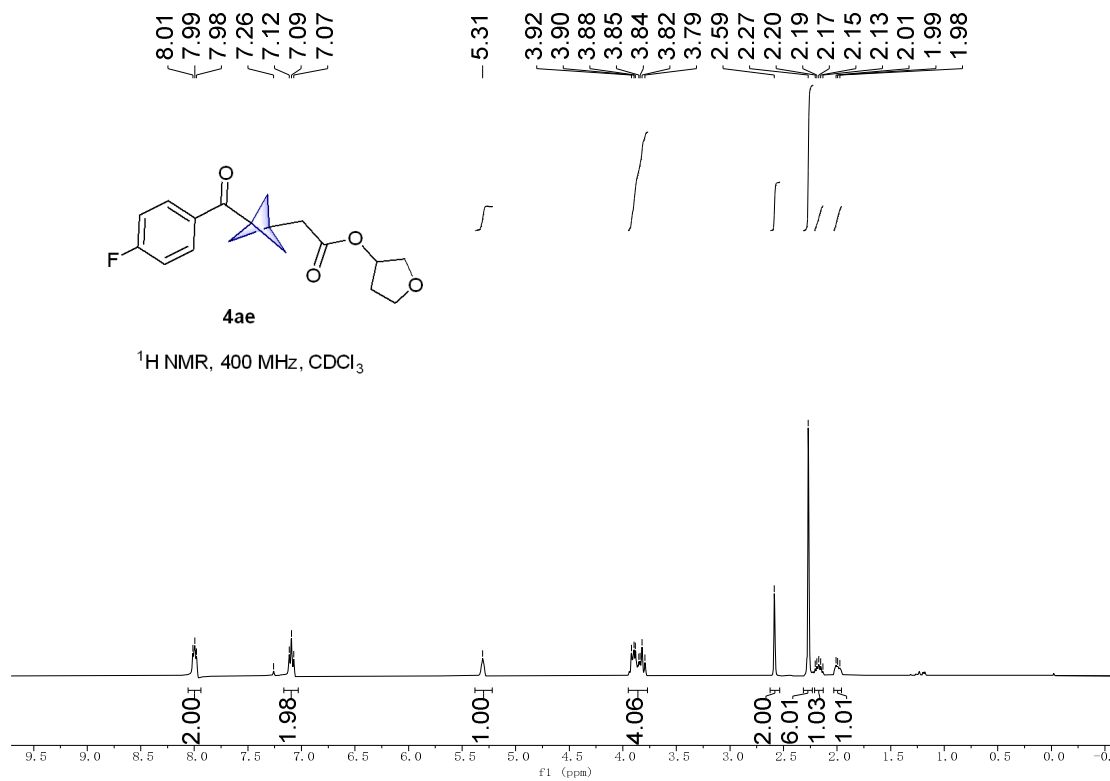

- 195.27

170.68  
166.76  
164.23

132.77  
132.74  
131.52  
131.43  
115.66  
115.44

77.32  
77.00  
76.68  
74.92  
73.14  
66.94  
54.17  
44.58  
37.00  
36.57  
32.72

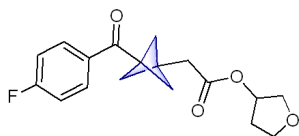

**4ae**

<sup>13</sup>C NMR, 100 MHz, CDCl<sub>3</sub>

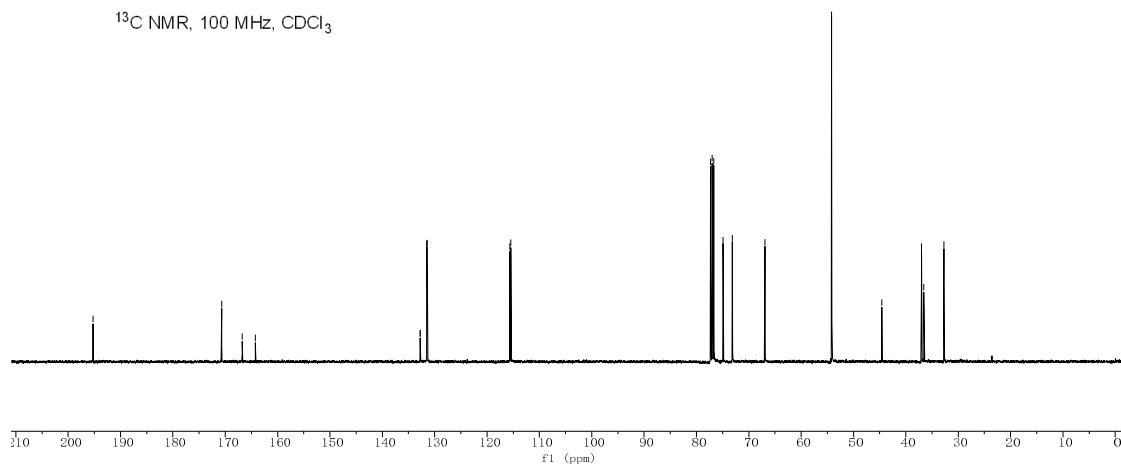

- -105.03

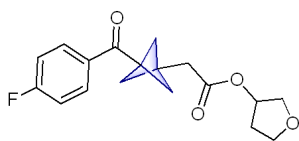

**4ae**

<sup>19</sup>F NMR, 376 MHz, CDCl<sub>3</sub>

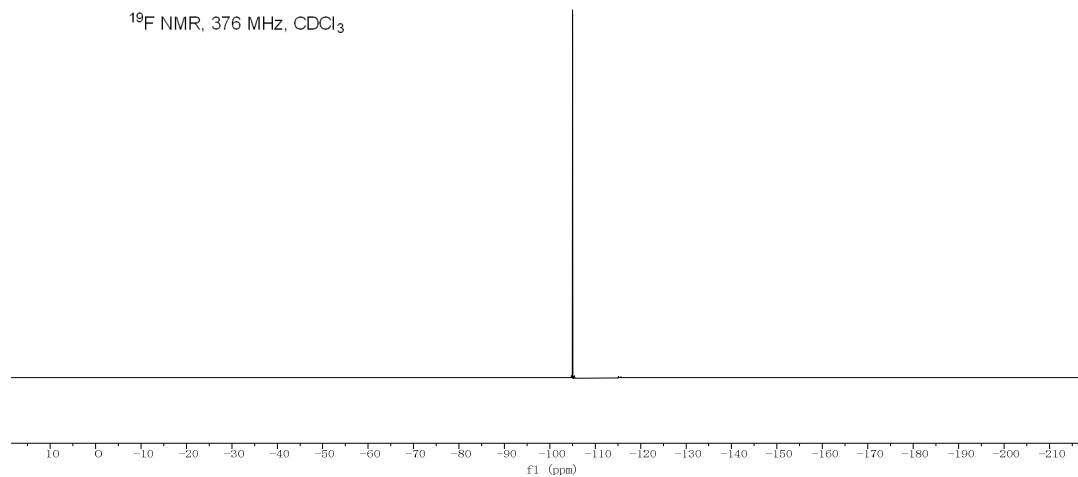



**3,3,4,4,5,5,6,6,7,7,8,8,8-tridecafluorooctyl 2-(3-(4-fluorobenzoyl)bicyclo[1.1.1]pentan-1-yl)acetate (4af)**

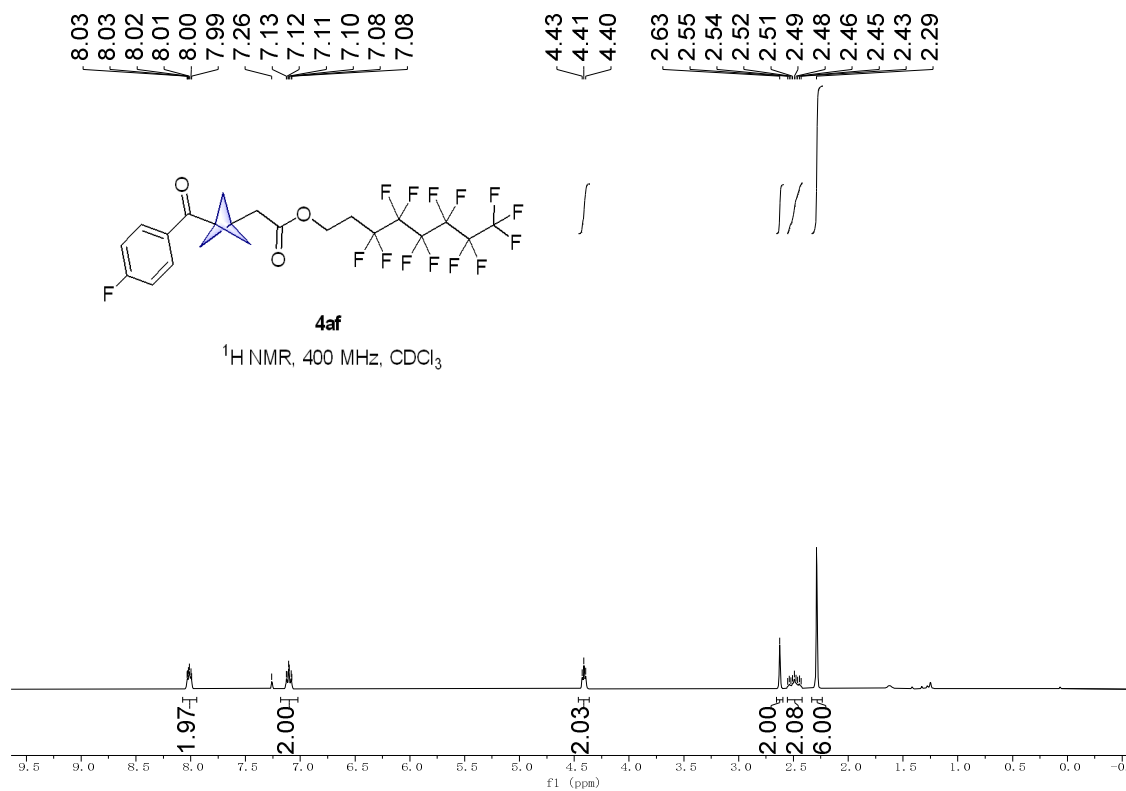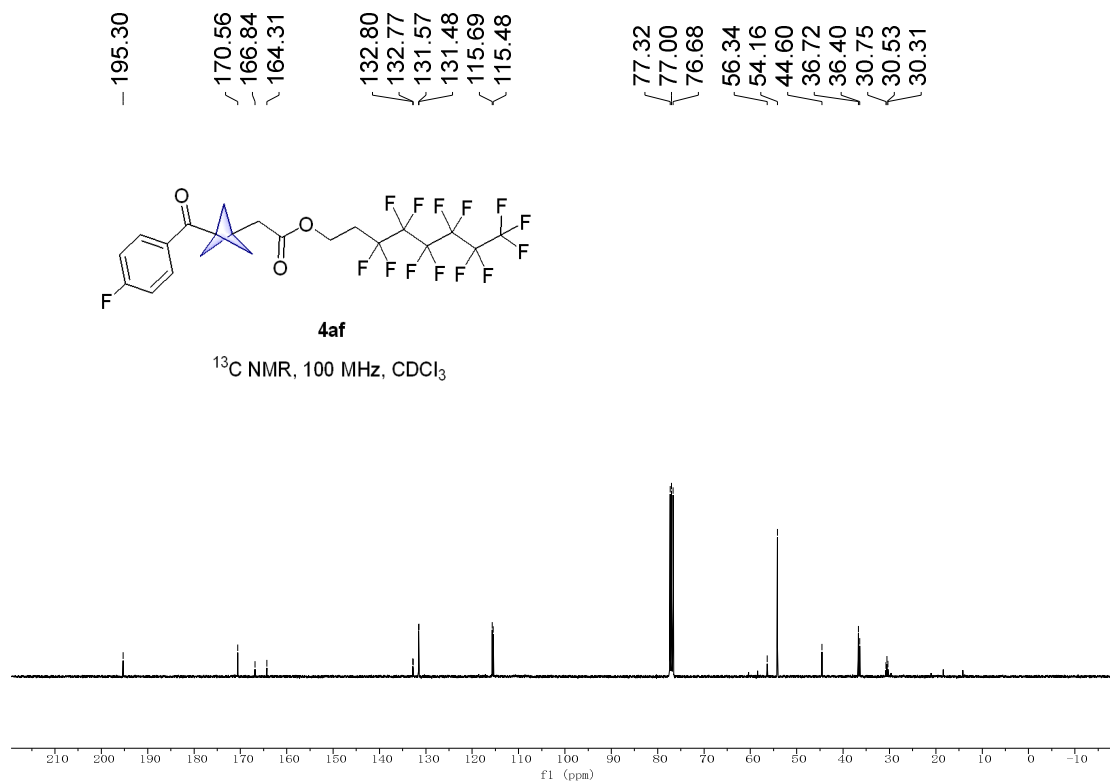



- 195.41  
 ~ 171.08  
 ~ 166.74  
 ~ 164.21  
 { 132.82  
 { 132.79  
 { 131.54  
 { 131.45  
 { 115.62  
 { 115.40  
 { 77.32  
 { 77.00  
 { 76.68  
 ~ 62.64  
 ~ 54.17  
 ~ 44.57  
 ~ 37.10  
 ~ 36.68  
 - 17.45  
 - -1.57

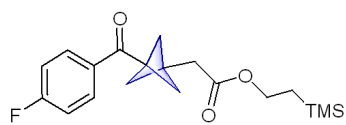

**4ag**  
 $^{13}\text{C}$  NMR, 100 MHz,  $\text{CDCl}_3$

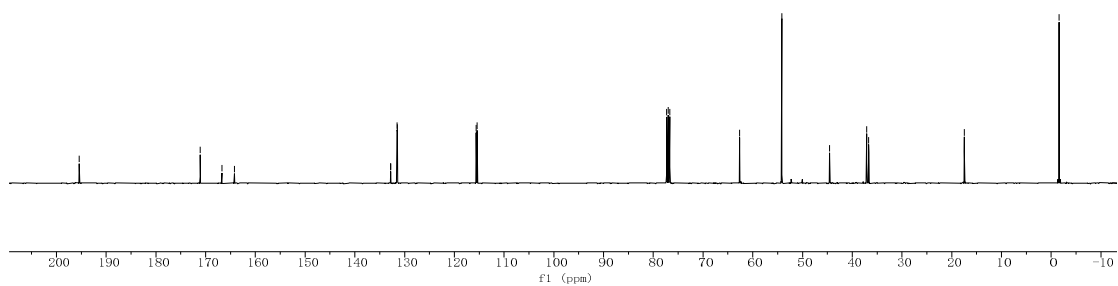

- -105.12

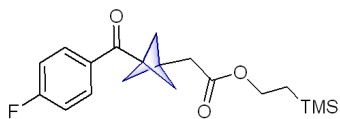

**4ag**  
 $^{19}\text{F}$  NMR, 376 MHz,  $\text{CDCl}_3$

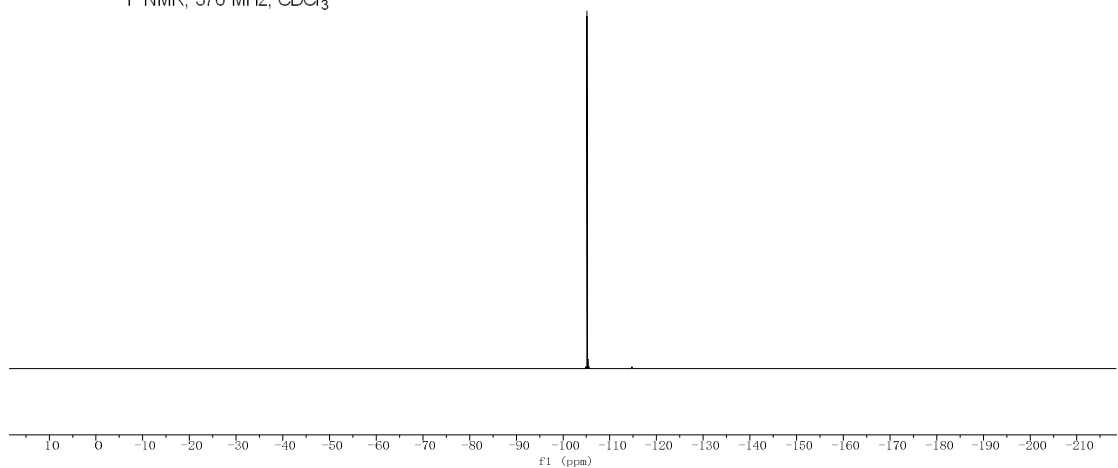

**But-2-yn-1-yl 2-(3-(4-fluorobenzoyl)bicyclo[1.1.1]pentan-1-yl)acetate (4ah)**

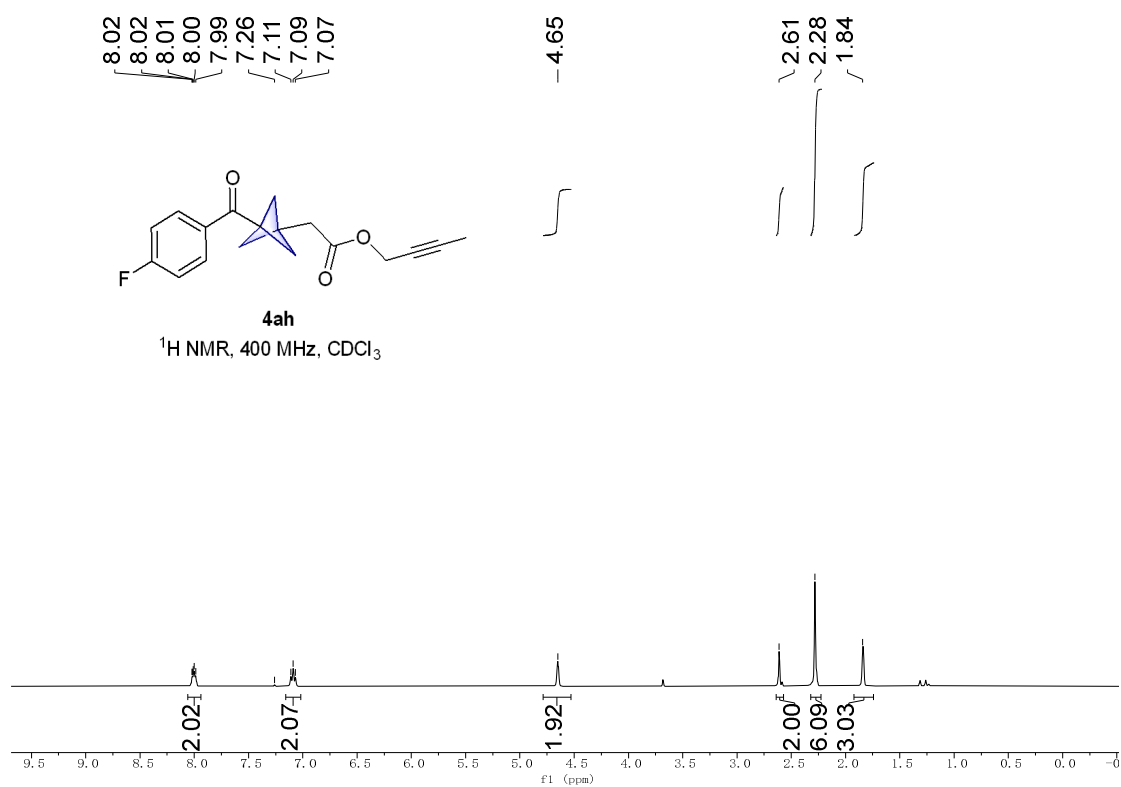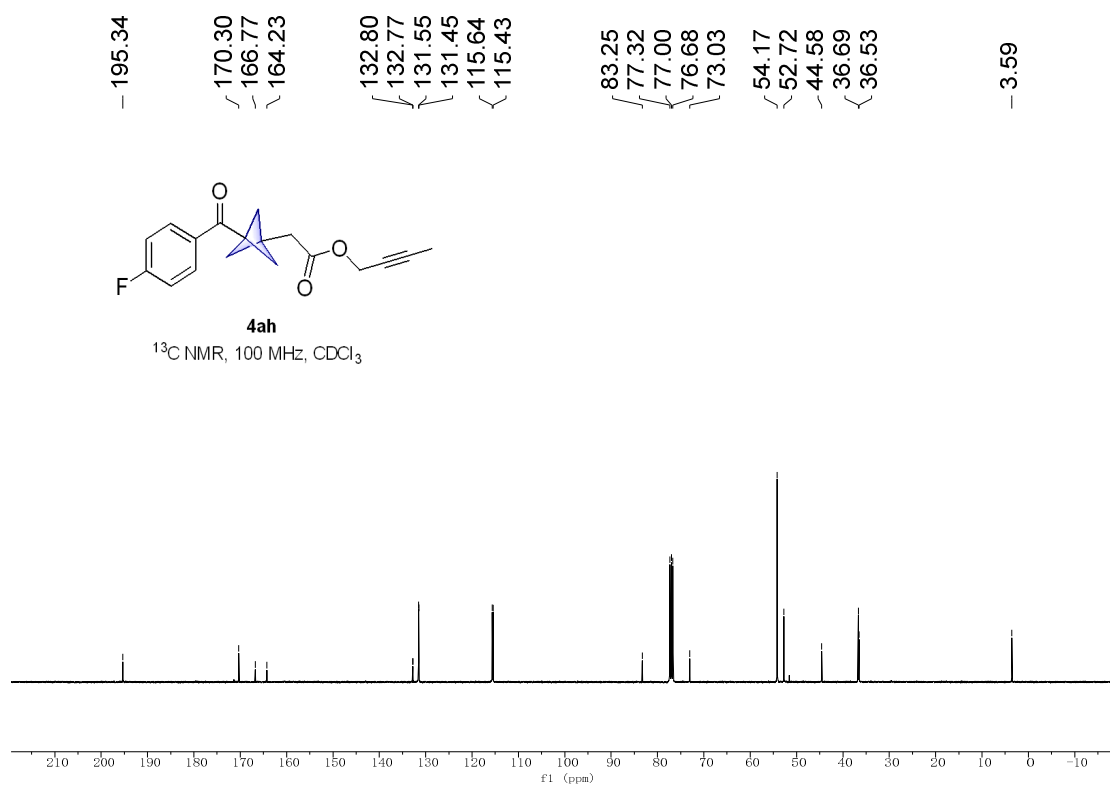

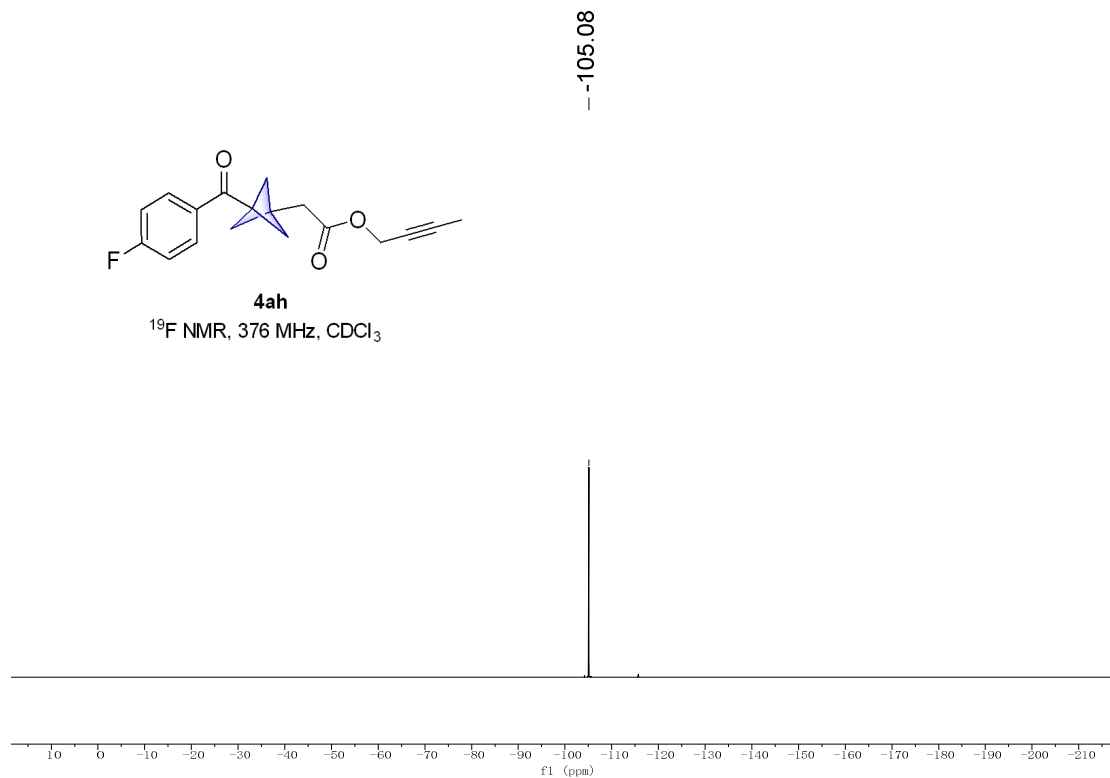

**(3R,5S,8R,9S,10S,13S,14S)-10,13-dimethyl-17-oxohexadecahydro-1H-cyclopenta[a]phenanthren-3-yl 2-(3-(4-fluorobenzoyl)bicyclo[1.1.1]pentan-1-yl)acetate (4am)**

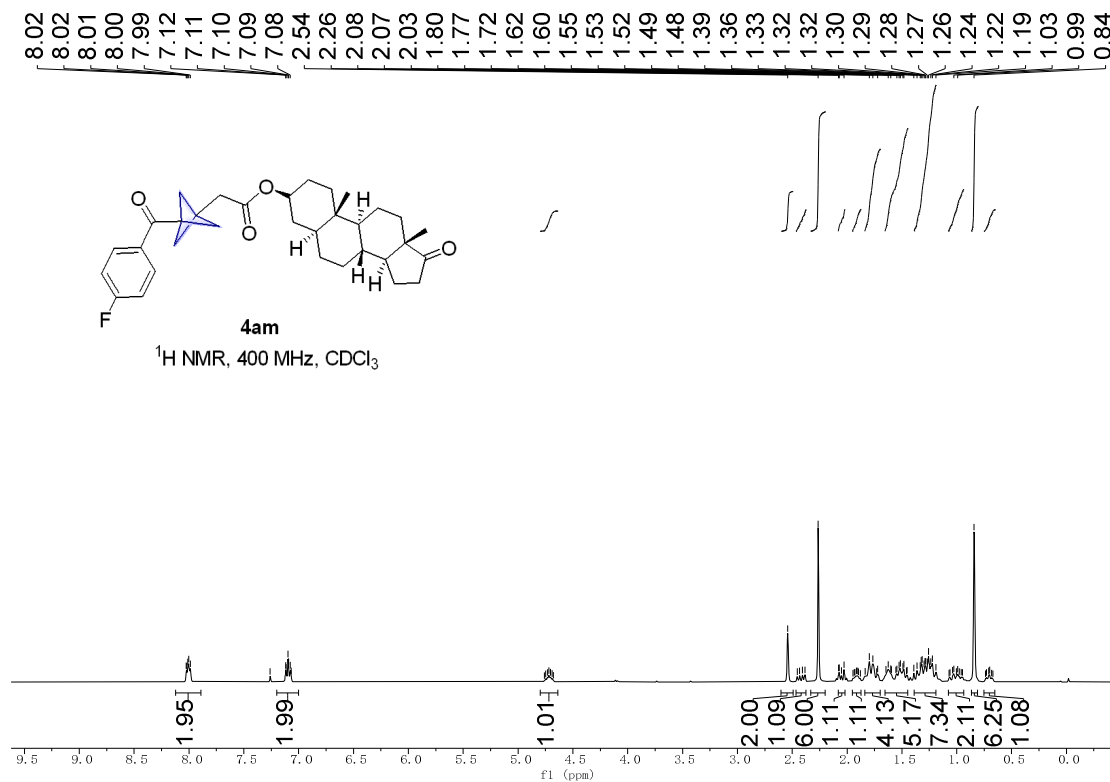

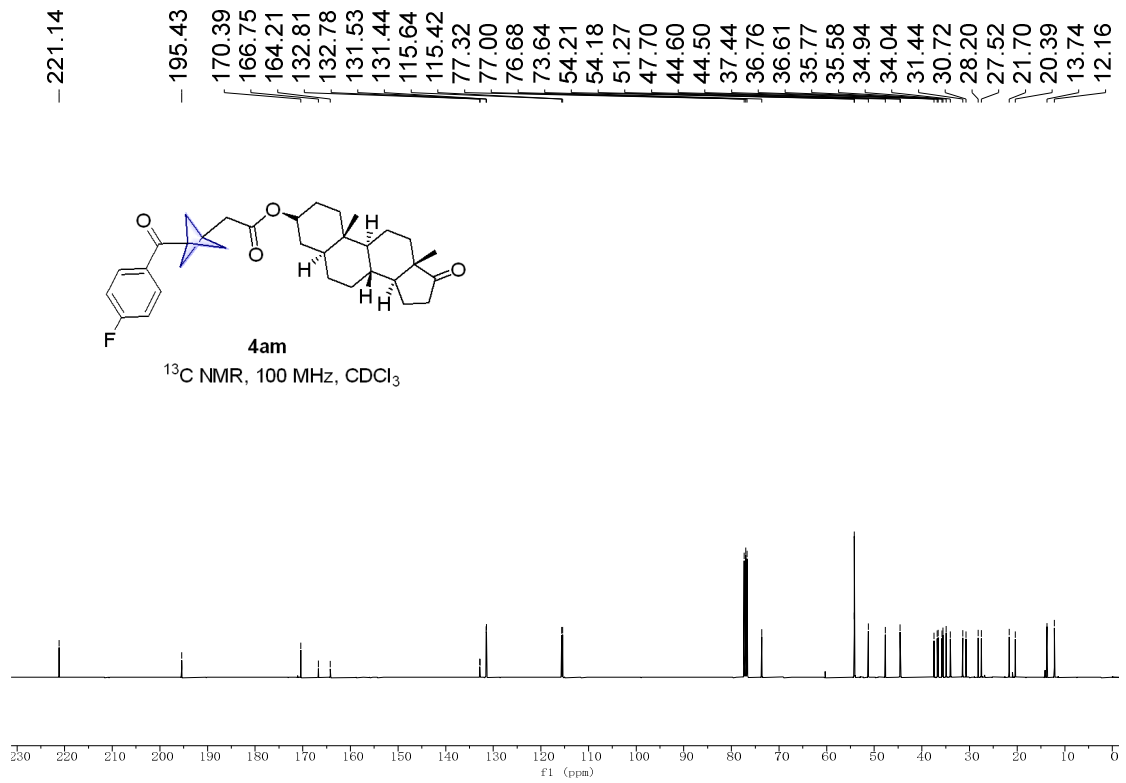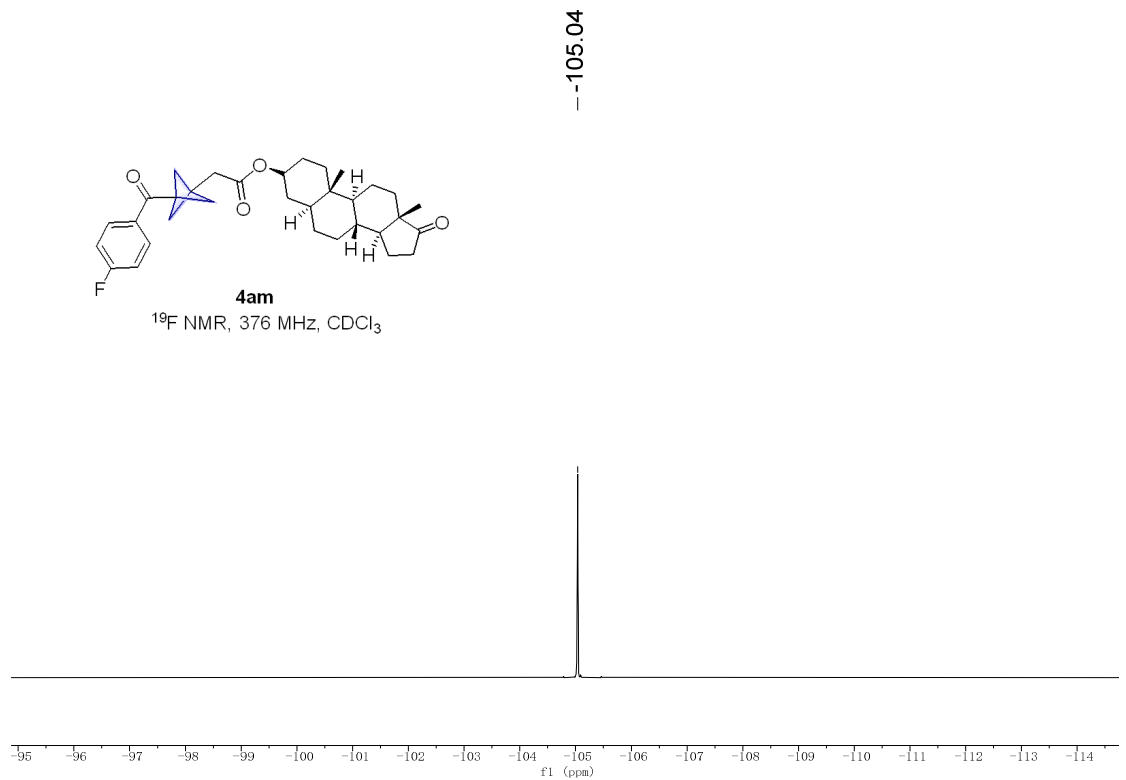

**(E)-3,7-dimethylocta-2,6-dien-1-yl 2-(3-(4-fluorobenzoyl)bicyclo[1.1.1]pentan-1-yl)acetate**  
**(4an)**

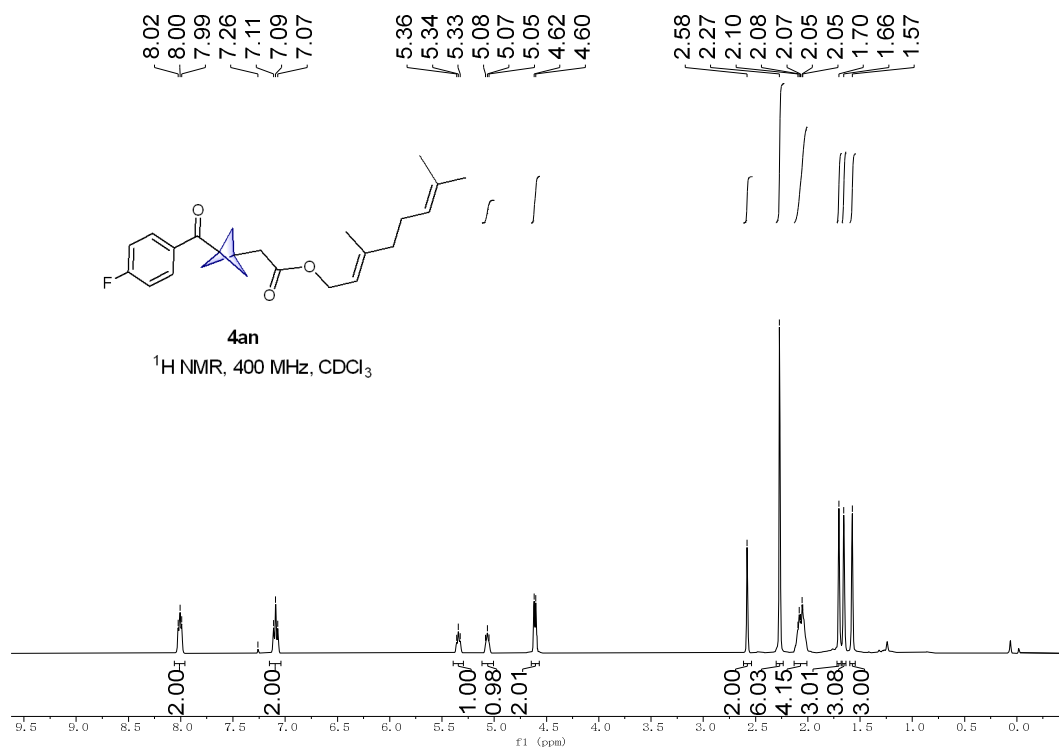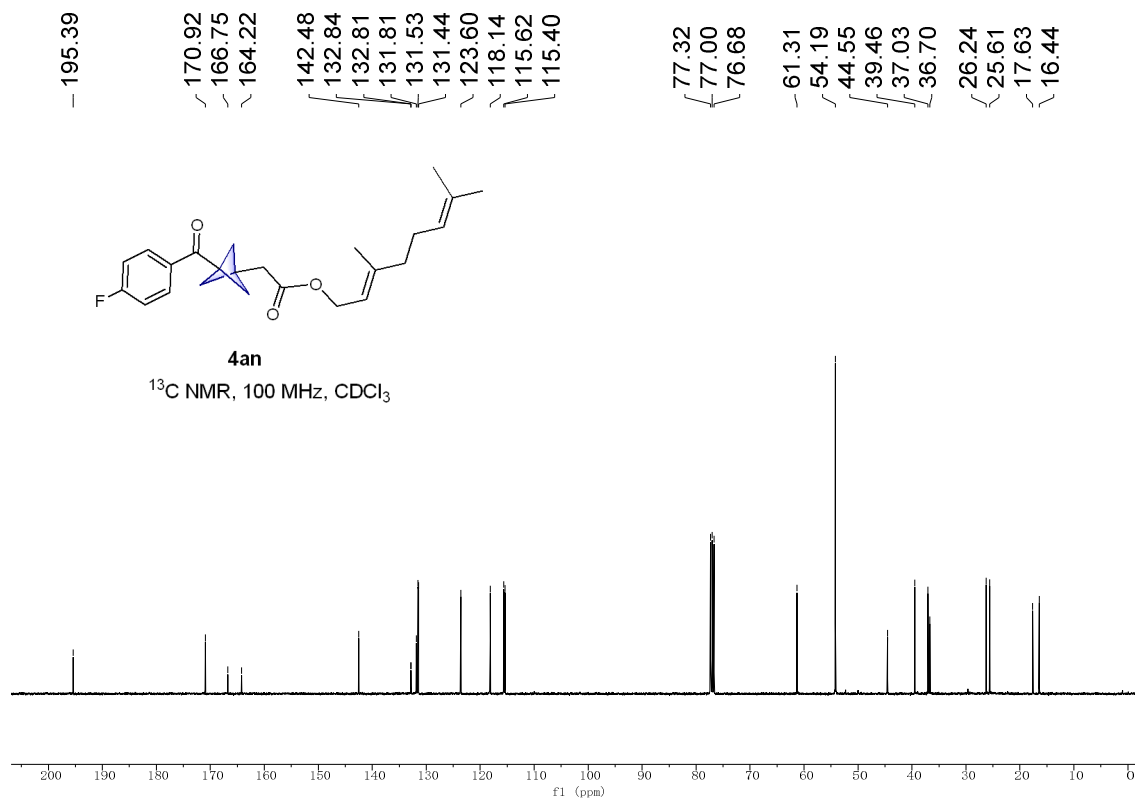

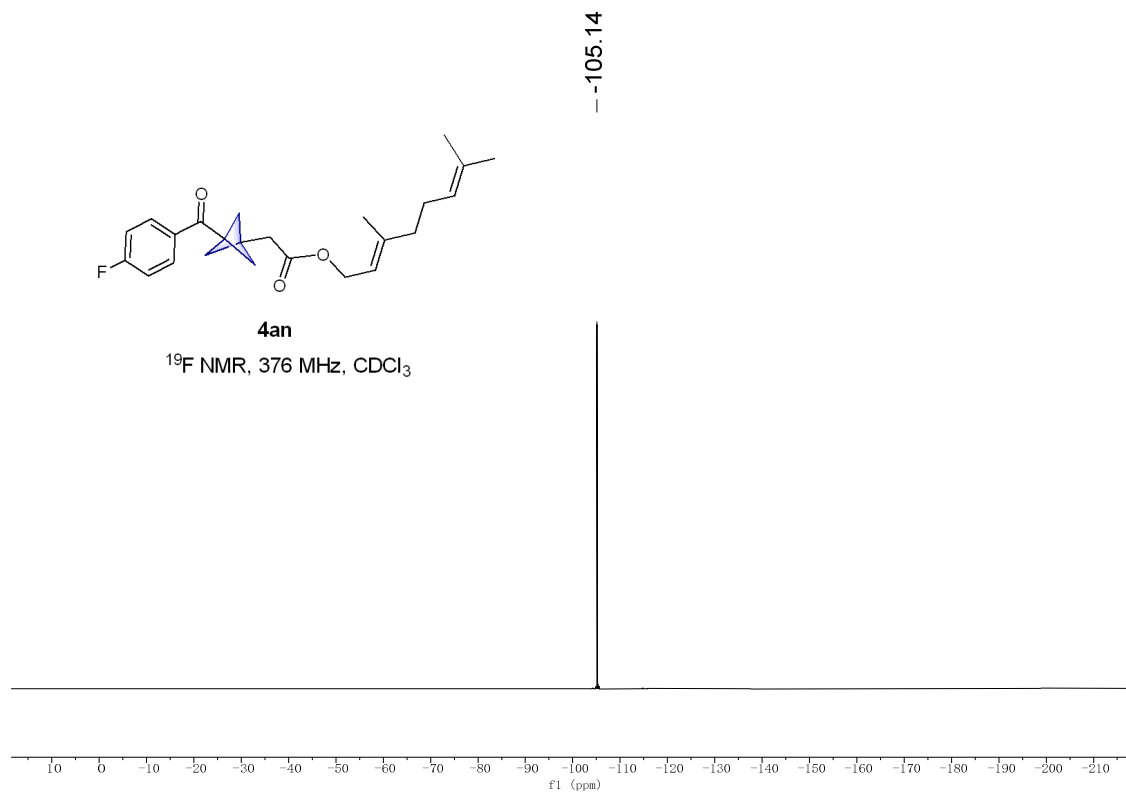

**2-((1R,5S)-6,6-dimethylbicyclo[3.1.1]hept-2-en-2-yl)ethyl  
 fluorobenzoyl)bicyclo[1.1.1]pentan-1-yl)acetate (4ao)**

**2-(3-(4-**

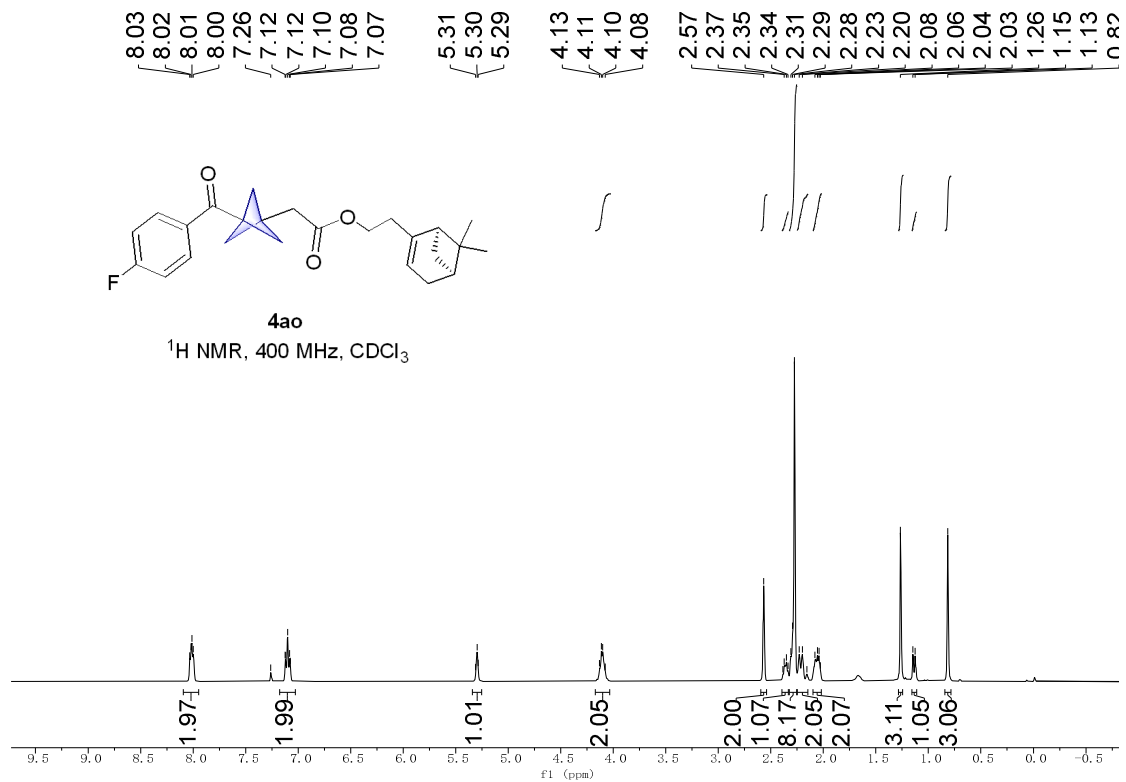



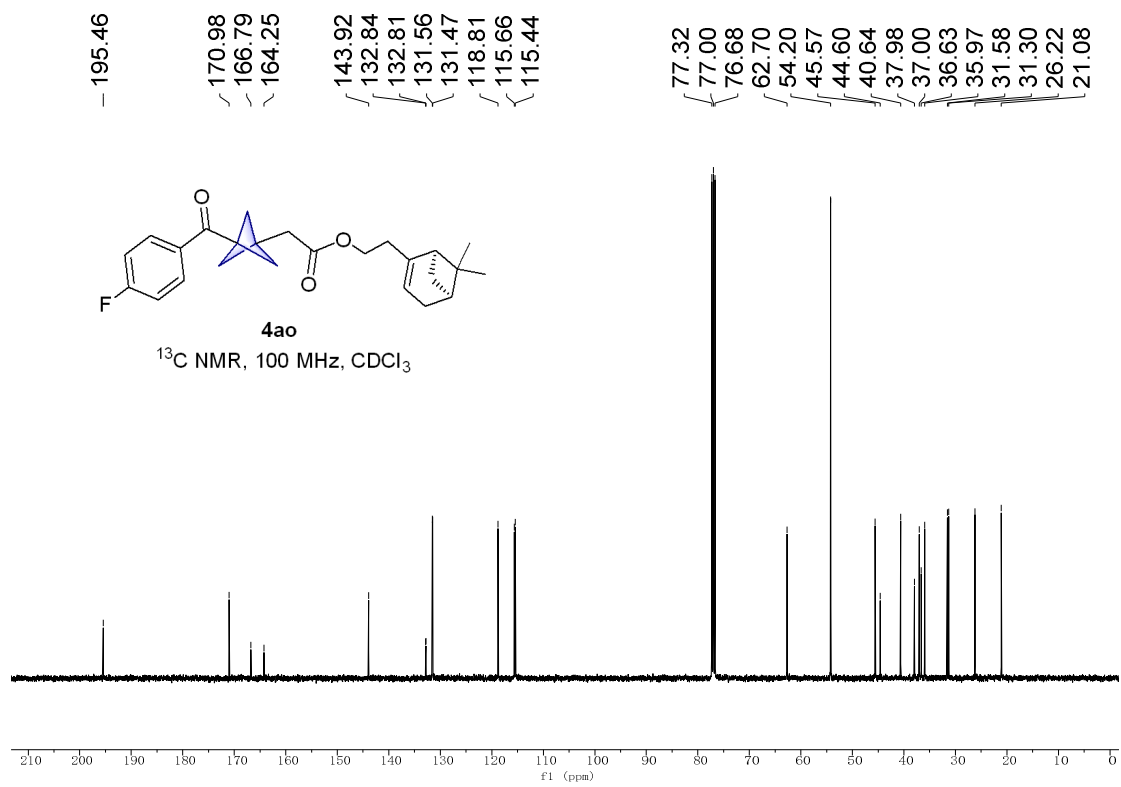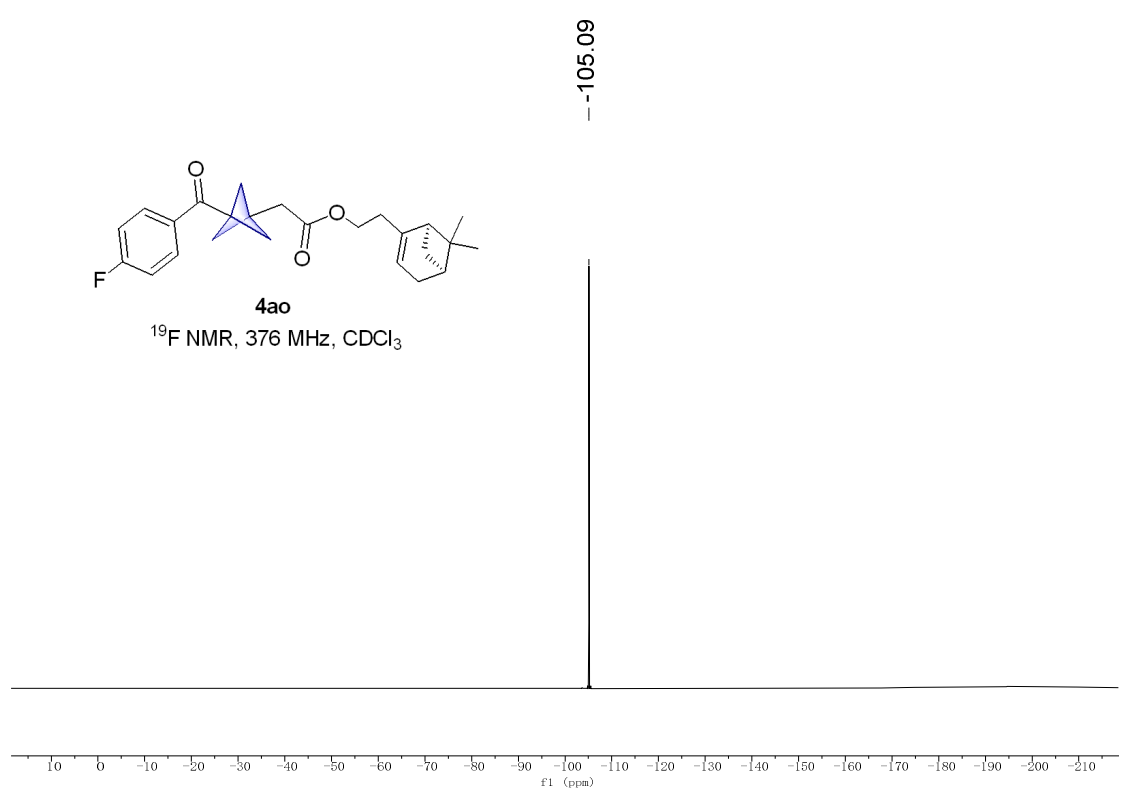

**4-(3-(2-ethoxy-2-oxoethyl)bicyclo[1.1.1]pentane-1-carbonyl)phenyl  
methoxynaphthalen-2-yl)propanoate (4ap)**

**(S)-2-(6-**

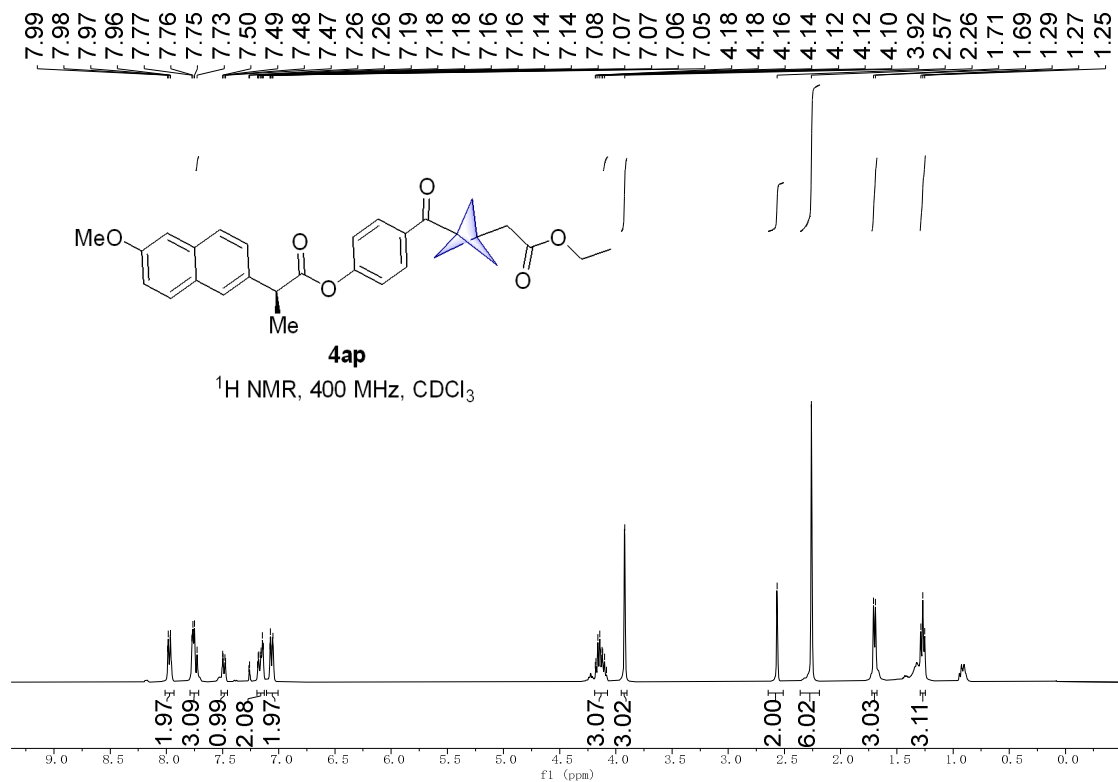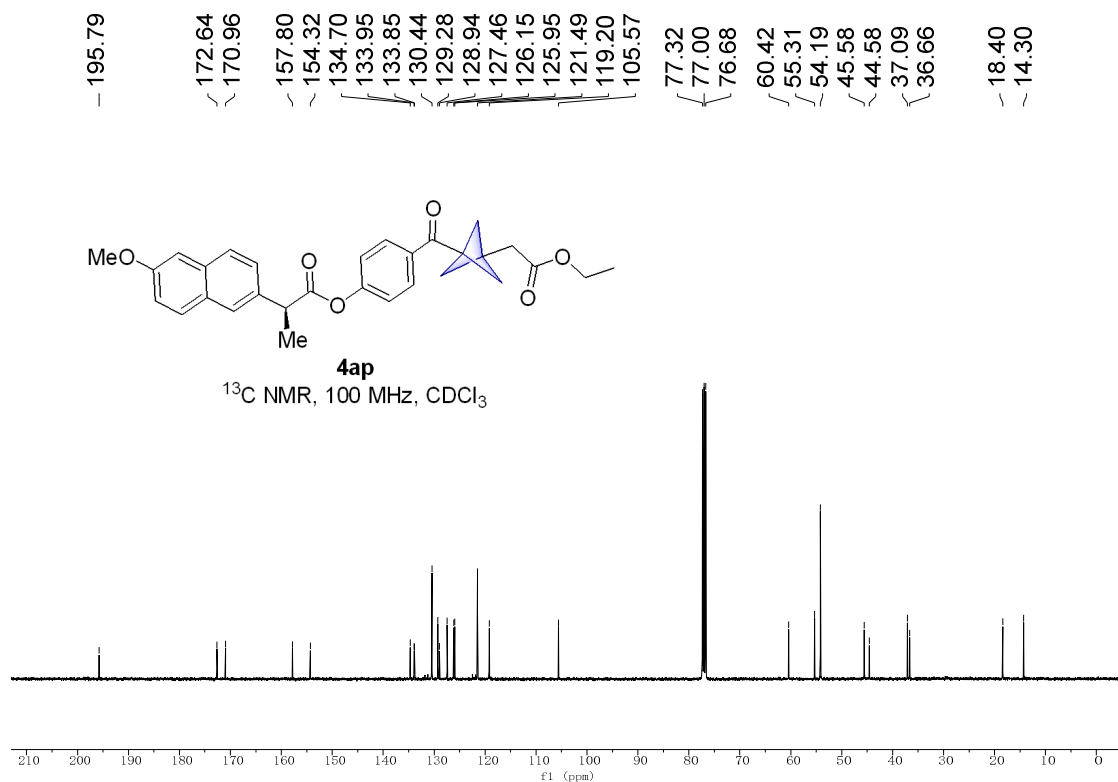

4-(3-(2-ethoxy-2-oxoethyl)bicyclo[1.1.1]pentane-1-carbonyl)phenyl  
isobutylphenyl)propanoate (4aq)

(S)-2-(4-

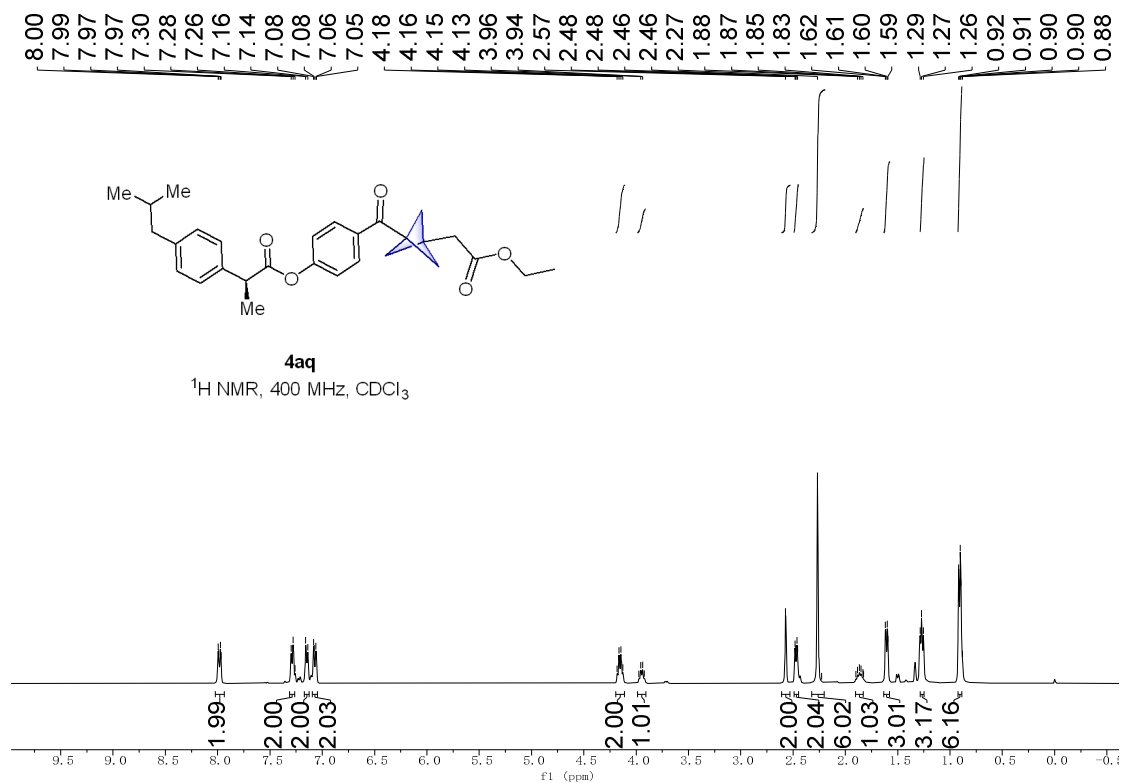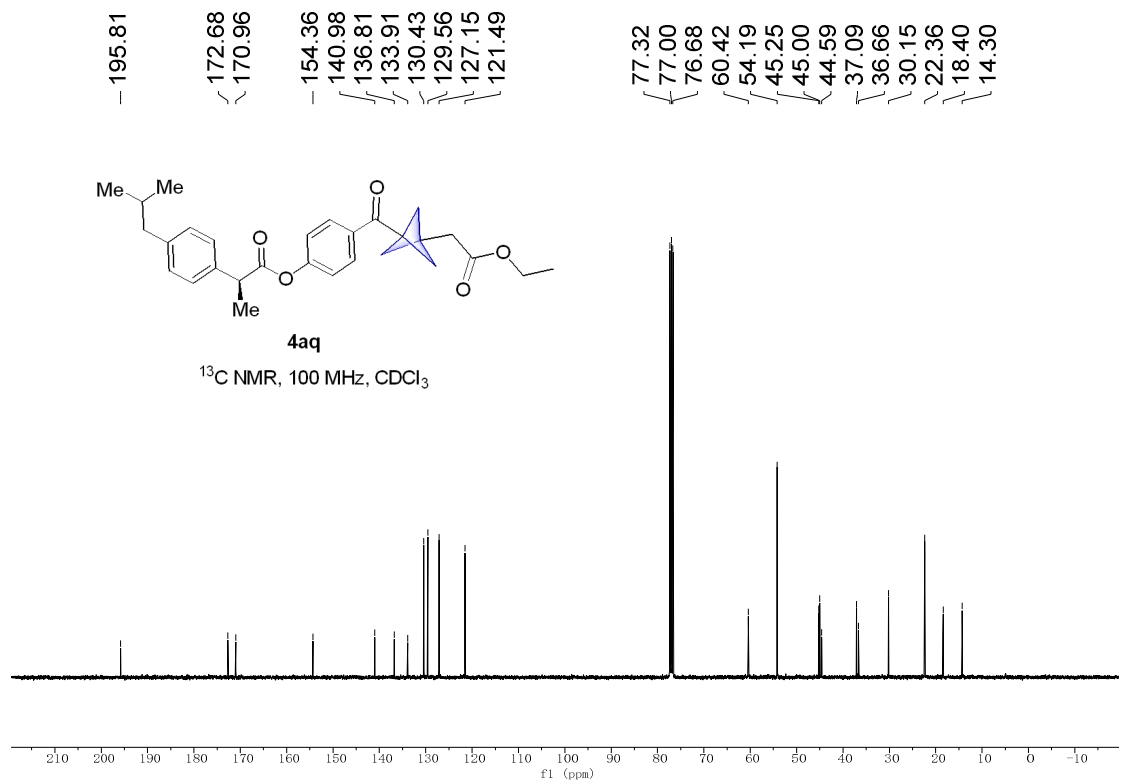

Supplement: d3gc00643c1.pdf [file d3gc00643c1.pdf]
